# Supplementary material
Source: PubMed Central journal article supplement (PMC2921852)
Supplement: NIHMS220753-supplement-1_si_001.pdf [file NIHMS220753-supplement-1_si_001.pdf]

## SUPPORTING INFORMATION

### Scope of the Ring Opening Metathesis Polymerization (ROMP) Reaction of 1-Substituted Cyclobutenes

Airong Song, Jae Chul Lee, Kathlyn A. Parker\* and Nicole S. Sampson\*  
*Department of Chemistry, Stony Brook University, Stony Brook, NY 11794-3400*

#### Table of Contents

|                                                                                                             |     |
|-------------------------------------------------------------------------------------------------------------|-----|
| Materials and Methods. ....                                                                                 | S4  |
| Figure S1. ROMP of secondary amides <b>2</b> . ....                                                         | S14 |
| Figure S2. ROM of esters <b>3</b> and tertiary amides <b>4</b> . ....                                       | S15 |
| Figure S3. <sup>1</sup> H-NMR spectra of ROM of monomer <b>3b</b> in CD <sub>2</sub> Cl <sub>2</sub> . .... | S16 |
| Figure S4. ROM of esters <b>4</b> . ....                                                                    | S17 |
| Figure S5. <sup>1</sup> H-NMR spectra of ROM of monomer <b>4a</b> in CD <sub>2</sub> Cl <sub>2</sub> . .... | S18 |
| Figure S6. <sup>1</sup> H-NMR spectrum of the 1-mer reaction products <b>9a</b> and <b>10a</b> . ....       | S19 |
| Figure S7. ROMP of carbinol esters <b>5</b> . ....                                                          | S20 |
| Figure S8. <sup>1</sup> H-NMR spectrum of <b>13</b> . ....                                                  | S21 |
| Figure S9. Structures of possible intermediates and ring opened products. ....                              | S22 |
| Table S1. ....                                                                                              | S23 |
| Table S2. ....                                                                                              | S24 |
| References.....                                                                                             | S25 |
| <sup>1</sup> H-NMR spectrum of <b>2b</b> .....                                                              | S27 |
| <sup>13</sup> C-NMR spectrum of <b>2b</b> .....                                                             | S28 |
| <sup>1</sup> H-NMR spectrum of <b>2c</b> .....                                                              | S29 |

|                                                     |     |
|-----------------------------------------------------|-----|
| <sup>13</sup> C-NMR spectrum of <b>2c</b> -----     | S30 |
| <sup>1</sup> H-NMR spectrum of <b>2d</b> -----      | S31 |
| <sup>13</sup> C-NMR spectrum of <b>2d</b> -----     | S32 |
| <sup>1</sup> H-NMR spectrum of <b>2e</b> -----      | S33 |
| <sup>13</sup> C-NMR spectrum of <b>2e</b> -----     | S34 |
| <sup>1</sup> H-NMR spectrum of <b>3a</b> -----      | S35 |
| <sup>13</sup> C-NMR spectrum of <b>3a</b> -----     | S36 |
| <sup>1</sup> H-NMR spectrum of <b>3b</b> -----      | S37 |
| <sup>13</sup> C-NMR spectrum of <b>3b</b> -----     | S38 |
| <sup>1</sup> H-NMR spectrum of <b>4b</b> -----      | S39 |
| <sup>13</sup> C-NMR spectrum of <b>4b</b> -----     | S40 |
| <sup>1</sup> H-NMR spectrum of <b>5a</b> -----      | S41 |
| <sup>13</sup> C-NMR spectrum of <b>5a</b> -----     | S42 |
| <sup>1</sup> H-NMR spectrum of <b>5b</b> -----      | S43 |
| <sup>13</sup> C-NMR spectrum of <b>5b</b> -----     | S44 |
| <sup>1</sup> H-NMR spectrum of <b>7</b> -----       | S45 |
| <sup>13</sup> C-NMR spectrum of <b>7</b> -----      | S46 |
| <sup>1</sup> H-NMR spectrum of <b>13</b> -----      | S47 |
| <sup>1</sup> H-NMR spectrum of <b>14</b> -----      | S48 |
| <sup>13</sup> C-NMR spectrum of <b>14</b> -----     | S49 |
| <sup>13</sup> C-APT NMR spectrum of <b>14</b> ----- | S50 |

|                                                                |           |
|----------------------------------------------------------------|-----------|
| $^1\text{H}$ - $^1\text{H}$ -gCOSY-NMR spectrum of <b>14</b>   | ----- S51 |
| $^1\text{H}$ - $^{13}\text{C}$ -HMQC-NMR spectrum of <b>14</b> | ----- S52 |
| $^1\text{H}$ -NMR spectrum of <b>19</b>                        | ----- S53 |
| $^1\text{H}$ -NMR spectrum of <b>20</b>                        | ----- S54 |
| $^1\text{H}$ -NMR spectrum of <b>21</b>                        | ----- S55 |
| $^1\text{H}$ -NMR spectrum of <b>22</b>                        | ----- S56 |

## Materials and Methods

**Materials and General Procedures.** Amino acids and coupling agents used were purchased from Advanced Chem Tech. (Louisville, KY) or PerSeptive Biosystems (Framingham, MA). Solvents and chemical reagents were obtained from Fisher Scientific, Inc. (Springfield, NJ) or Sigma-Aldrich (Milwaukee, WI). Second generation Grubbs' catalyst  $[(H_2IMes)(Pcy_3)Cl_2Ru=CHPh]$  and ethyl 1-bromocyclobutanecarboxylate were purchased from Aldrich (Cat # 569747 and 197297).  $(H_2IMes)(3-Brpyr)_2Cl_2Ru=CHPh$  was prepared according to the literature.<sup>1</sup> Cyclobut-1-enecarboxylic acid was synthesized according to the literature.<sup>2,3</sup>  $CH_2Cl_2$  and  $CH_3OH$  were dried in a GlassContour solvent pushstill system; benzene, pentane and  $Et_2O$  were used without further purification. All reactions were carried out under an Ar atmosphere in oven-dried glassware unless otherwise specified. Analytical thin layer chromatography (TLC) was performed on precoated silica gel plates (60F254), flash chromatography on silica gel-60 (230–400 mesh) and Combi-Flash chromatography on RediSep normal phase silica columns (silica gel-60, 230–400 mesh). TLC spots were detected by UV light and by staining with phosphomolybdic acid (PMA). Inova400, Inova500 and Inova600 MHz NMR Instruments were used to perform NMR analysis, and spectra were recorded in  $CDCl_3$  or  $CD_2Cl_2$  unless otherwise noted.  $^1H$ -NMR spectra are reported as chemical shift in parts per million (multiplicity, coupling constant in Hz, integration).  $^1H$ -NMR data are assumed to be first order. The usual workup for ester or amide coupling reactions was three washes of the  $CH_2Cl_2$  solution with 5%  $NaHCO_3$ , followed by three washes with 1 N HCl and drying of the  $CH_2Cl_2$  over  $Na_2SO_4$ . After evaporation of solvent, the final product was purified by flash silica chromatography or Combi-Flash chromatography

instrument (Teledyne Isco company). LC-MS spectra were acquired on a Waters ACQUITY Ultra Performance Liquid Chromatography system with an SQD detector using a 10 cm×2.1 mm ACQUITY™ BEH C18 (particle size = 1.7  $\mu$ m) column (Waters Corp, Milford, USA) with elution by a linear gradient of 20-100% *B* at 0.5 mL/min, where *A* = water and *B* = methanol.

**PDI (Polydispersity Index) determination.** The polymers (before flash column chromatography purification) were dissolved in THF (0.5 mg/mL). An aliquot (100  $\mu$ L) of the polymer solution was injected and analyzed by gel permeation chromatography using a Phenogel column (300 x 7.80 mm, 5  $\mu$ m, linear mixed bed, 0-40k MW range). Elution was performed at 0.7 mL/min with THF and detection at 220 nm at 30 °C. Narrowly dispersed polystyrene standards from Aldrich were used as molecular weight calibrants. The number average and weighted average molecular weights were calculated from the chromatogram.

**Cyclobut-1-enecarboxylic Acid, 6.** The acid was prepared according to the literature (42% yield).<sup>2,3</sup> <sup>1</sup>H-NMR (400 MHz)  $\delta$  10.23 (bs, 1H), 6.94 (t, *J*=1.2 Hz, 1H), 2.76 (t, *J*=3.2 Hz, 2H), 2.51 (td, *J*=3.2 Hz, 1.2 Hz, 2H). <sup>13</sup>C-NMR (100 MHz, CDCl<sub>3</sub>)  $\delta$  162.7, 146.5, 138.8, 51.2, 29.3, 27.3.

**CB-GlyOMe, 2a.** The amide was prepared as previously described (40% yield).<sup>3</sup> <sup>1</sup>H-NMR (400 MHz)  $\delta$  6.66 (s, 1H), 6.04 (s, 1H), 4.10 (d, *J*=5.2 Hz, 2H), 3.77 (s, 3H), 2.73 (m, 2H), 2.47 (m, 2H). <sup>13</sup>C-NMR (100 MHz, CDCl<sub>3</sub>)  $\delta$  170.6, 162.7, 141.5, 140.9, 52.5, 40.9, 28.6, 26.5.

**CB-AlaOMe, 2b.** H-Ala-OMe·HCl (0.61 mmol, 77 mg), cyclobut-1-enecarboxylic acid **6** (0.51 mmol, 50 mg) and 1-ethyl-3-(3-dimethylaminopropyl) carbodiimide hydrochloride (EDC·HCl) (0.61 mmol, 117 mg) were dissolved in 2 mL CH<sub>2</sub>Cl<sub>2</sub>. Diisopropylethyl amine (DIEA) (1.0 mmol, 181  $\mu$ L) was added at 0 °C, and the reaction was stirred for 12 h at rt. The usual workup and chromatography

(EtOAc:CH<sub>2</sub>Cl<sub>2</sub>/2:8) yielded amide **2b** (43 mg, 33%) as a white powder. <sup>1</sup>H-NMR (400 MHz) δ 6.65 (s, 1H), 6.11 (s, 1H), 4.66 (m, 1H), 3.76 (s, 3H), 2.72 (m, 2H), 2.47 (m, 2H), 1.44 (d, J=7.2, 3H). <sup>13</sup>C-NMR (100 MHz, CDCl<sub>3</sub>) δ 173.9, 162.3, 141.8, 141.2, 52.9, 48.2, 29.1, 26.8, 18.7. HRMS (ESI) calcd. for C<sub>9</sub>H<sub>14</sub>NO<sub>3</sub> [M+H]<sup>+</sup> 184.0974, found 184.0973.

**CB-CONHCH<sub>2</sub>CH<sub>2</sub>OMe, 2c.** NH<sub>2</sub>CH<sub>2</sub>CH<sub>2</sub>OCH<sub>3</sub> (0.61 mmol, 46 mg), cyclobut-1-enecarboxylic acid **6** (0.51 mmol, 50 mg) and EDC·HCl (0.61 mmol, 117 mg) were dissolved in 2 mL CH<sub>2</sub>Cl<sub>2</sub>. DIEA (1.0 mmol, 181 μL) was added at 0 °C, and the reaction was stirred for 12 h at rt. The usual workup and chromatography (EtOAc: CH<sub>2</sub>Cl<sub>2</sub>/3:7) yielded **2c** (29 mg, 44%) as a white powder. <sup>1</sup>H-NMR (400 MHz) δ 6.60 (s, 1H), 5.92 (s, 1H), 3.50 (m, 4H), 3.36 (s, 3H), 2.69 (m, 2H), 2.45 (m, 2H). <sup>13</sup>C-NMR (100 MHz, CDCl<sub>3</sub>) δ 162.9, 141.6, 140.6, 71.4, 59.0, 38.9, 28.7, 26.3. HRMS (ESI) calcd. for C<sub>8</sub>H<sub>14</sub>NO<sub>2</sub> [M+H]<sup>+</sup> 156.1025, found 156.1028.

**CB-Glu(OtBu)OMe, 2d.** H-Glu(OtBu)-OMe·HCl (0.61 mmol, 155 mg), cyclobut-1-enecarboxylic acid **6** (0.51 mmol, 50 mg) and EDC·HCl (0.61 mmol, 117 mg) were dissolved in 2 mL CH<sub>2</sub>Cl<sub>2</sub>. DIEA (1.0 mmol, 181 μL) was added at 0 °C, and the reaction was stirred for 4 h at rt. The usual workup and chromatography (EtOAc:CH<sub>2</sub>Cl<sub>2</sub>/3:7) yielded **2d** (64 mg, 42 %) as a white powder. <sup>1</sup>H-NMR (500 MHz) δ 6.67 (s, 1H), 6.44 (d, J=7 Hz, 1H), 4.65 (m, 1H), 3.78 (s, 3H), 2.74 (t, J=3.0 Hz, 2H), 2.48 (d, J=2.5 Hz, 2H), 2.34 (m, 2H), 2.17 (m, 1H), 2.03 (m, 1H), 1.46 (s, 9H). <sup>13</sup>C-NMR (100 MHz, CD<sub>2</sub>Cl<sub>2</sub>) δ 172.8, 163.7, 142.3, 140.8, 81.1, 52.2, 51.7, 31.7, 28.5, 27.6, 26.5, 26.3. HRMS (ESI) calcd. for C<sub>15</sub>H<sub>24</sub>NO<sub>5</sub> [M+H]<sup>+</sup> 298.1654, found 298.1663.

**CB-CONHCH<sub>2</sub>CH<sub>2</sub>CH<sub>2</sub>Ph(*p*-CH<sub>3</sub>), 2e.** NH<sub>2</sub>CH<sub>2</sub>CH<sub>2</sub>CH<sub>2</sub>Ph(*p*-CH<sub>3</sub>) (0.61 mmol, 91 mg), cyclobut-1-enecarboxylic acid **6** (0.51 mmol, 50 mg) and EDC·HCl (0.61 mmol, 117 mg) were

dissolved in 2 mL CH<sub>2</sub>Cl<sub>2</sub>. DIEA (1.0 mmol, 181 μL) was added at 0 °C, and the reaction was stirred for 4 h at rt. The usual workup and chromatography (acetone:CH<sub>2</sub>Cl<sub>2</sub>/1:9) yielded **2e** (29 mg, 25%) as a white powder. <sup>1</sup>H-NMR (400 MHz) δ 7.10 (d, J=1.2 Hz, 4H), 6.49 (s, 1H), 3.29 (m, 2H), 2.61-2.64 (m, 4H), 2.43 (m, 2H), 2.31 (s, 3H), 1.82 (m, 2H). <sup>13</sup>C-NMR (100 MHz, CD<sub>2</sub>Cl<sub>2</sub>) δ 162.5, 142.1, 139.6, 138.8, 135.7, 129.4, 129.2, 128.5, 38.9, 33.1, 31.5, 29.9, 28.6, 26.2, 20.9. HRMS (ESI) calcd. for C<sub>15</sub>H<sub>20</sub>NO [M+H]<sup>+</sup> 230.1545, found 230.1543.

**CB-CON(CH<sub>3</sub>)CH<sub>2</sub>CO<sub>2</sub>Me, 3a.** NH(CH<sub>3</sub>)CH<sub>2</sub>CO<sub>2</sub>CH<sub>3</sub>·HCl (0.61 mmol, 85 mg), cyclobut-1-enecarboxylic acid **6** (0.51 mmol, 50 mg), DMAP (0.10 mmol, 13 mg) and EDC·HCl (0.61 mmol, 117 mg) were dissolved in 2 mL CH<sub>2</sub>Cl<sub>2</sub>. DIEA (1.0 mmol, 181 μL) was added at 0 °C, and the reaction was stirred for 16 h at rt. The usual workup and chromatography (EtOAc:CH<sub>2</sub>Cl<sub>2</sub>/1:9) yielded **3a** (12 mg, 13%) as a white powder. <sup>1</sup>H-NMR (400 MHz) δ 6.53 (s, 1H), 6.33 (s, 0.47H), 4.22-4.11 (m, 2H+0.94 H), 3.77 (s, 0.94H), 3.74 (s, 2H), 3.22 (s, 3H), 3.03 (s, 1.41H), 2.85 (t, J=3.2 Hz, 2H), 2.78 (t, J=3.2 Hz, 0.94H), 2.48 (t, J=3.2 Hz, 2H), 2.45 (t, J=3.2 Hz, 0.94H). <sup>13</sup>C-NMR (100 MHz, CDCl<sub>3</sub>) δ 170.0, 169.9, 164.5, 164.1, 142.9, 141.1, 140.8, 52.3, 49.9, 37.1, 35.2, 31.6, 27.4. HRMS (ESI) calcd. for C<sub>9</sub>H<sub>14</sub>NO<sub>3</sub> [M+H]<sup>+</sup> 184.0974, found 184.0975.

**CB-CO-piperidine, 3b.** Bis(2-oxo-3-oxazolidinyl)phosphinic chloride (BOP-Cl) (0.83 mmol, 211 mg) and cyclobut-1-enecarboxylic acid **6** (0.75 mmol, 74 mg) were dissolved in 3 mL CH<sub>2</sub>Cl<sub>2</sub>. DIEA (0.75 mmol, 134 μL) was added at 0 °C, and the reaction was stirred for 2 h at rt. Piperidine (0.91 mmol, 77 mg) and diisopropylethyl amine (DIEA) (0.75 mmol, 134 μL) were added into the solution, which was stirred for another 20 h. The usual workup and chromatography (acetone:CH<sub>2</sub>Cl<sub>2</sub>/1:9) yielded **3b** (76 mg, 61%) as a white powder. <sup>1</sup>H-NMR (500 MHz) δ 6.40 (s, 1H), 3.62 (t, J=2.5 Hz,

4H), 2.85 (t, J=2.5 Hz, 2H), 2.49 (t, J=2.5 Hz, 2H), 1.69-1.58 (m, 6H). <sup>13</sup>C-NMR (100 MHz, CDCl<sub>3</sub>) δ 162.9, 141.5, 139.8, 47.0, 43.0, 32.0, 27.4, 24.8. HRMS (ESI) calcd. for C<sub>10</sub>H<sub>16</sub>NO [M+H]<sup>+</sup> 166.1232, found 166.1233.

**CB-CO<sub>2</sub>Me, 4a.** The methyl ester was prepared as previously described (45% yield).<sup>4</sup> <sup>1</sup>H-NMR (400 MHz) δ 6.74 (s, 1H), 3.68 (s, 3H), 2.69 (m, 2H), 2.46 (m, 2H). <sup>13</sup>C-NMR (100 MHz) δ 162.7, 146.5, 138.8, 51.2, 29.3, 27.3. HRMS (EI) calcd. for C<sub>6</sub>H<sub>8</sub>O<sub>2</sub> [M]<sup>+</sup> 112.05243, found 112.05228.

**CB-CO<sub>2</sub>CH<sub>2</sub>CO<sub>2</sub>Me, 4b.** Cyclobut-1-enecarboxylic acid **6** (0.51 mmol, 50 mg) and BrCH<sub>2</sub>CO<sub>2</sub>CH<sub>3</sub> were dissolved in 2 mL dry CH<sub>2</sub>Cl<sub>2</sub>. KI (0.10 mmol, 17 mg) and DIEA (0.61 mmol, 108 μL) were added into the solution at 0 °C. The reaction was stirred for 17 h at rt. The usual workup and chromatography (EtOAc:CH<sub>2</sub>Cl<sub>2</sub>/0.5:9.5) yielded **4b** (46 mg, 53%) as a sticky oil. <sup>1</sup>H-NMR (500 MHz) δ 6.92 (s, 1H), 4.69 (s, 2H), 3.79 (s, 3H), 2.80 (m, 2H), 2.53 (m, 2H). <sup>13</sup>C-NMR (100 MHz, CD<sub>2</sub>Cl<sub>2</sub>) δ 168.4, 161.1, 148.4, 137.8, 60.3, 52.2, 29.2, 27.6. HRMS (ESI) calcd. for C<sub>8</sub>H<sub>10</sub>O<sub>4</sub>Na [M+Na]<sup>+</sup> 193.0477, found 193.0485.

**1-Cyclobutenemethanol, 7.** 1-Cyclobutenemethanol, **7** was obtained by synthetic procedures previously described in the literature<sup>5</sup> with major modifications using DIBAL-H. Dry Et<sub>2</sub>O (4.58 mL) was added to a solution of **4a** (302 mg, 2.70 mmol) in dry CH<sub>2</sub>Cl<sub>2</sub> (1.82 mL) and the solution was cooled to -78 °C. DIBAL-H (1.2 mL, 6.74 mmol) was added dropwise to the solution. After stirring at -78 °C for 4 h, the reaction mixture was poured slowly into a mixture of Et<sub>2</sub>O (18.0 mL) and saturated aqueous potassium sodium tartrate (70 mL). The mixture was stirred until both layers turned clear (30 min), and the Et<sub>2</sub>O layer was separated. Additional Et<sub>2</sub>O (18 mL × 2) was added to the separated aqueous solution to extract the product. The combined Et<sub>2</sub>O extracts were dried over anhydrous Na<sub>2</sub>SO<sub>4</sub>. The



solvent was carefully evaporated under reduced pressure (10 mm Hg) and the residue was further purified by vacuum distillation (25 °C, 0.01 mm Hg) using a Kugelrohr apparatus to yield **7** (92.4 mg, 45% yield). <sup>1</sup>H-NMR (400 MHz, CDCl<sub>3</sub>) δ 5.93 (m, 1H), 4.09 (m, 2H), 2.52 (m, 2H), 2.42 (m, 2H), 1.37 (t, J=6.0 z, 1H); <sup>13</sup>C-NMR (100 MHz, CDCl<sub>3</sub>) δ 148.7, 128.8, 61.6, 29.6, 27.1.

**1-Cyclobutenylmethyl acetate, 5a.** 3,3-Dimethylaminopyridine (DMAP) (29.1 mg, 0.238 mmol) and DIEA (1.18 mL, 7.14 mmol) were added to a solution of **7** (200 mg, 2.38 mmol) in dry CH<sub>2</sub>Cl<sub>2</sub> (5.0 mL) and cooled to 0 °C. Acetyl chloride (339 μL, 4.76 mmol) was added dropwise to the solution at 0 °C. The reaction mixture was stirred at rt for 2 h. After the reaction was complete, iced H<sub>2</sub>O (25 mL) was added slowly to the reaction mixture. The mixture was extracted with CH<sub>2</sub>Cl<sub>2</sub> (50 mL × 2) and the combined organic extracts were washed with 1N aq HCl (25 mL × 2), 5% aq NaHCO<sub>3</sub> (25 mL) and 10% aq NaCl (25 mL). The organic layer was dried over anhydrous Na<sub>2</sub>SO<sub>4</sub> and the solvent was evaporated under reduced pressure. The residue was purified by silica column chromatography with CH<sub>2</sub>Cl<sub>2</sub> to afford **5a** (258 mg, 86% yield). The purified fractions were concentrated and diluted with dry CH<sub>2</sub>Cl<sub>2</sub> and the solution was stored at -20 °C. <sup>1</sup>H-NMR (600 MHz, CDCl<sub>3</sub>) δ 5.86 (s, 1H), 4.42 (s, 2H), 2.44 (b, 2H), 2.34 (b, 2H), 2.00 (s, 3H); <sup>13</sup>C-NMR (100 MHz, CDCl<sub>3</sub>) δ 170.71, 143.61, 131.53, 62.06, 30.05, 27.23, 20.76.

**1-Cyclobutenylmethyl trimethyl acetate, 5b.** 3,3-Dimethylaminopyridine (DMAP) (13.4 mg, 0.109 mmol) and DIEA (495 μL, 2.84 mmol) were added to a solution of **7** (92 mg, 1.09 mmol) in dry CH<sub>2</sub>Cl<sub>2</sub> (4.5 mL) and cooled to 0 °C. Trimethyl acetyl chloride (175 μL, 1.42 mmol) was added dropwise to the solution at 0 °C. The reaction mixture was stirred at rt for 2 h. After the reaction was complete, iced H<sub>2</sub>O (25 mL) was added slowly to the reaction mixture. The mixture was extracted with

CH<sub>2</sub>Cl<sub>2</sub> (50 mL × 2) and the combined organic extracts were washed with 1N aq HCl (25 mL × 2), 5% aq NaHCO<sub>3</sub> (25 mL) and 10% aq NaCl (25 mL). The organic layer was dried over anhydrous Na<sub>2</sub>SO<sub>4</sub> and the solvent was evaporated under reduced pressure. The residue was purified by silica column chromatography with CH<sub>2</sub>Cl<sub>2</sub> to afford **5b** (172 mg, 94% yield). The purified fractions were concentrated and diluted with dry CH<sub>2</sub>Cl<sub>2</sub> and the solution was stored at -80 °C. <sup>1</sup>H-NMR (500 MHz, CDCl<sub>3</sub>) δ 5.91 (m, 1H), 4.52 (m, 2H), 2.50 (m, 2H), 2.42 (m, 2H), 1.23 (s, 9H); <sup>13</sup>C-NMR (100 MHz, CDCl<sub>3</sub>) δ 178.5, 144.2, 130.8, 62.2, 39.1, 30.1, 27.4, 26.7; LRMS (ESI) calcd for C<sub>10</sub>H<sub>17</sub>O<sub>2</sub> [M+H]<sup>+</sup> 169.12, found 169.10.

**ROM of Methyl cyclobut-1-enecarboxylate 4a: 9a and 10a.** A solution of **4a** (40.0 mg, 0.357 mmol) in dry CH<sub>2</sub>Cl<sub>2</sub> (4 mL) was added to a solution of precatalyst **1** (474 mg, 0.536 mmol) in dry CH<sub>2</sub>Cl<sub>2</sub> (4 mL) at rt. The solution was stirred at rt for 20 h and ethyl vinyl ether (5 mL, 52.2 mmol) was added to the reaction mixture. After 60 min, the solvent was evaporated and the residue was purified by silica column chromatography with CH<sub>2</sub>Cl<sub>2</sub>. The purified fractions were evaporated to afford the products **9a** and **10a** (42.1 mg, 55% yield) with *E/Z* molar ratio 2.3/1. <sup>1</sup>H-NMR (600 MHz, CD<sub>2</sub>Cl<sub>2</sub>) 1-mer **9a** *Z*-isomer δ 7.36-7.19 (m, 5H), 6.47 (d, J=12.6 Hz, 1H), 6.15 (s, 1H), 5.68 (dt, J=11.4, 7.8 Hz, 1H), 5.60 (s, 1H), 3.72 (s, 3H), 2.50 (m, 2H), 2.43 (m, 2H). 1-mer **10a** *E*-isomer δ 7.36-7.19 (m, 5H), 6.42 (d, J=16.2 Hz, 1H), 6.25 (dt, J=22.8, 6.0 Hz, 1H), 6.17 (s, 1H), 5.60 (s, 1H), 3.75 (s, 3H), 2.50 (m, 2H), 2.43 (m, 2H). <sup>13</sup>C-NMR (100 MHz, CD<sub>2</sub>Cl<sub>2</sub>) 1-mer **9a** *Z*-isomer δ 167.9, 140.6, 138.1, 132.1, 130.8, 130.0, 129.3, 128.6, 127.2, 125.5, 52.2, 32.6, 28.0. 1-mer **10a** *E*-isomer δ 168.0, 140.7, 138.1, 131.0, 130.3, 129.0, 128.7, 127.5, 126.5, 52.2, 32.4, 32.3. LC-MS (APCI): Peak time=2.18 min, m/z calcd for C<sub>14</sub>H<sub>16</sub>O<sub>2</sub> [M+H]<sup>+</sup> 217.12, found 217.21, m/z calcd for C<sub>14</sub>H<sub>15</sub>NaO<sub>2</sub> [M+Na]<sup>+</sup> 239.10,

found 239.26,  $m/z$  calcd for  $C_{13}H_{13}O$   $[M-CH_3O]^+$  185.10, found 185.14,  $m/z$  calcd for  $C_{12}H_{13}$   $[M-CO_2CH_3]^+$  157.11, found 157.15.

**ROMP of 5a: 13.** A solution of **5a** (7.6 mg, 0.06 mmol) in dry  $CD_2Cl_2$  (300  $\mu$ L) was added to a solution of precatalyst **1** (5.3 mg, 0.006 mmol) in dry  $CD_2Cl_2$  (300  $\mu$ L) at rt. The reaction was monitored by NMR spectroscopy at rt for 1.5 h and ethyl vinyl ether (300  $\mu$ L, 3.13 mmol) was added to the reaction mixture. After 30 min, the solvent was evaporated and the residue was purified by silica column chromatography with  $CH_2Cl_2$  and 2% MeOH/ $CH_2Cl_2$ . The purified fractions were evaporated to afford the product **13** (6 mg, 73% yield).  $^1H$ -NMR (600 MHz,  $CD_2Cl_2$ )  $\delta$  7.34-7.20 (m, 5H), 6.58 (m, 0.4H), 6.42(m, 0.6H), 6.24 (m, 0.6H), 5.43 (m, 10H), 5.03 (m, 1H), 4.94 (m, 1H), 4.66-4.48 (, 20H), 2.35-1.92 (m, 70H). HRMS (ESI) calcd. for  $C_7H_{11}O_2$   $[M+H]^+$  127.0754, found 127.0752.

**ROMP of 1-cyclobutenylmethyl trimethyl acetate 5b: 14.** A solution of **5b** (47.4 mg, 0.282 mmol) in dry  $CH_2Cl_2$  (600  $\mu$ L) was added to a solution of precatalyst **1** (25 mg, 0.0282 mmol) in dry  $CH_2Cl_2$  (2.82 mL) at rt. The solution was stirred at rt for 3 h and ethyl vinyl ether (300  $\mu$ L, 3.13 mmol) was added to the reaction mixture. After 30 min, the solvent was evaporated and the residue was purified by silica column chromatography with  $CH_2Cl_2$  and 1-2% MeOH/ $CH_2Cl_2$ . The purified fractions were evaporated to afford the product **14** (30 mg, 60% yield).  $^1H$ -NMR (500 MHz,  $CD_2Cl_2$ )  $\delta$  7.38-7.12 (m, 10H), 6.62-6.50 (br s, with max. at 6.57, 2H), 6.46-6.32 (br d, with max. at 6.42 and 6.38, 2H), 6.28~6.14 (br m, with max. at 6.24, 2H), 5.62-5.24 (br m, with max. at 5.43, 19H), 4.72~4.95 (br m, with max. at 4.64, 14H), 4.95~4.50 (br m, with max. at 4.57, 8H), 4.50~4.36 (br m, with max. at 4.46, 10H), 2.40~1.94 (br m, with max. at 2.17, 64H), 1.30~1.04 (br s, with max. at 1.18, 144H);  $^{13}C$ -NMR (100 MHz,  $CD_2Cl_2$ )  $\delta$  139.0-136.5 (with max. at 138.1 and 137.6), 136.0-134.0 (with max. at

135.1), 131.5-129.3 (with max. at 130.0), 129.3-126.3 (styrenyl carbons), 69.2-67.9 (with max. at 68.4), 64.2-62.8 (with max. at 63.4), 62.8-61.6 (with max. at 62.1), 39.2, 36.4-34.6 (with max. at 35.9 and 35.6), 32.6-30.6 (with max. at 31.4), 29.6-28.2 (with max. at 28.7), 27.5, 27.2-25.8 (with max. at 27.0).  $^1\text{H}$ - $^{13}\text{C}$  gHMQC spectrum, see Table S1.

**General Procedure for NMR Tube Reactions.** An NMR tube was evacuated for 15 min, and then was purged with Ar for another 15 min. Under an Ar atmosphere, a solution of monomer in  $\text{CD}_2\text{Cl}_2$  (300  $\mu\text{L}$ ) was added to the NMR tube. A solution of precatalyst  $(\text{H}_2\text{IMes})(3\text{-Br-Py})_2(\text{Cl})_2\text{Ru}=\text{CHPh}$  in  $\text{CD}_2\text{Cl}_2$  (300  $\mu\text{L}$ ) was added to the NMR tube. The stoichiometries of the reactions are indicated in Table S2. After complete mixing of the solution, the NMR tube was placed into the 400 MHz, 500 MHz or 600 MHz NMR spectrometer, and the reaction was monitored for several hours at 25 °C until almost all of the monomer had been consumed. Then the reaction was quenched with ethyl vinyl ether (50  $\mu\text{L}$ ), and was monitored for an additional 1 h.

**Computational Methods.** All the structure optimizations were performed using the hybrid DFT method at the B3LYP level, a combination of Becke's three-parameter hybrid exchange function (B3)<sup>6,7</sup> with the Lee-Yang-Parr correlation function<sup>8</sup> as implemented in Gaussian 03W. The basis sets for the optimization of monomers and their corresponding ring-opened ruthenium carbenes were 6-31G\* and LANL2DZ, respectively (Figure 7a). The NBO charge calculations were performed using Hartree-Fock with the 6-31G++\* basis set (for cyclobutene monomers) and the LANL2DZ basis set (for ruthenium carbenes). The AIM (atoms in molecule) electron density analysis was performed using the AIMPAC package.<sup>9</sup>

The initial ruthenium-carbene structure was obtained from the crystal structure of  $(\text{H}_2\text{IMes})(\text{pyridine})_2\text{Cl}_2\text{Ru}=\text{CHPh}$ ,<sup>10</sup> and was modified with GaussianView 3.0. The geometry optimization of the ruthenium-carbenes was performed using the B3LYP/LANL2DZ method (Figure 8).<sup>11-24</sup> To simplify the computation, a methyl and a  $\text{CONHCH}_3$  group represented the polymer chain and the 1-carbonyl amide group, respectively (Figure 8). The structures of the metallacyclobutane intermediates (Figure 8) were optimized using B3LYP/LANL2DZ in the following way: only one bond in the metallocyclobutane ring was optimized while the other three bond lengths were kept constant, and the partial optimization was continued optimizing each bond in turn until the optimized structure changed little in energy ( $\Delta E < 6.3 \times 10^{-4}$  kcal/mol). Vibrational frequency calculations using B3LYP/LANL2DZ were performed for all model compounds, and there were no imaginary vibrations present in any of the final structures (Figures 7 and S9). Free energies computed for structures (Figure 8) in solvent ( $\text{CH}_2\text{Cl}_2$ ) include the electronic energy plus the solvation free energy from the CPCM solvation model based on the UAKS radii using Gaussian 03W.

**Figure S1.** ROMP of secondary amides **2**. Conversion yield represents the molar ratio of consumed monomer to the initial monomer before ROMP. All the data were collected by comparing the integration of the signals for monomer and the signals for the propagating polymer chains in the  $^1\text{H}$  NMR spectra.

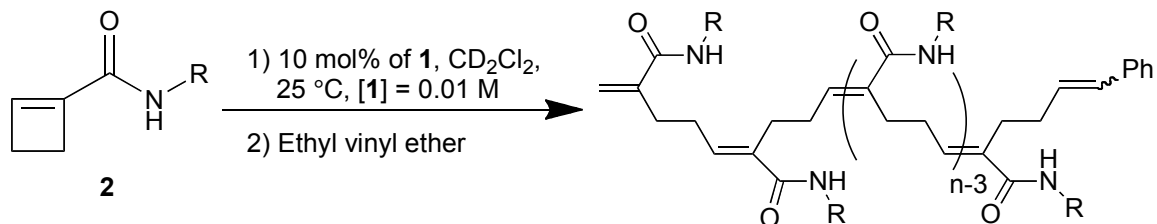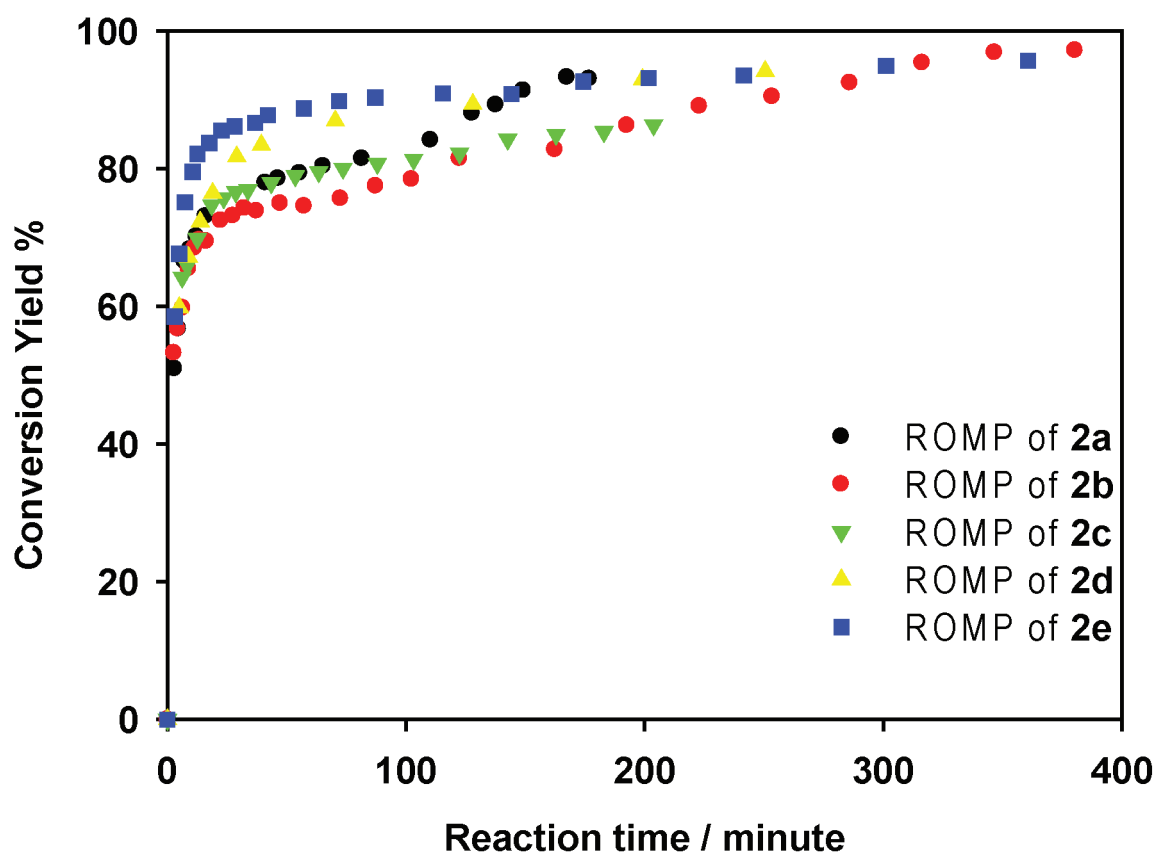

**Figure S2.** ROM of esters **3** and tertiary amides **4**. Conversion yield represents the molar ratio of consumed monomer to the initial monomer before ROM. All the data were collected by comparing the integration of the signals for monomer and the signals for the propagating polymer chains in the  $^1\text{H}$  NMR spectra.

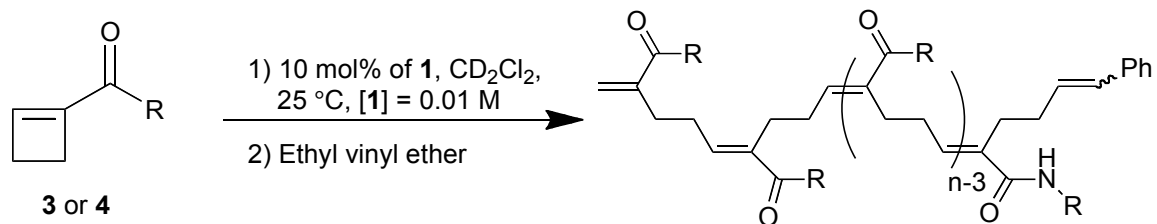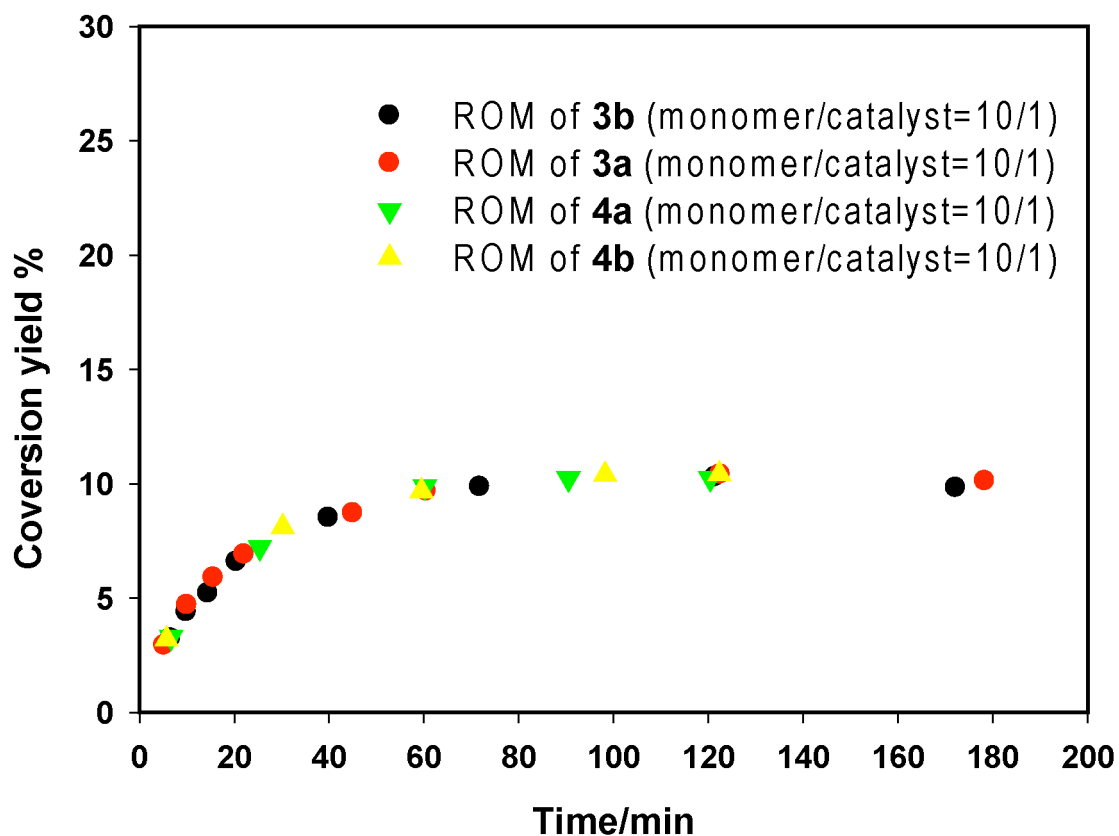

**Figure S3.**  $^1\text{H-NMR}$  spectra of ROM of monomer **3b** in  $\text{CD}_2\text{Cl}_2$  ( $[\mathbf{3b}] = 0.1 \text{ M}$ ,  $[\mathbf{1}] = 0.01 \text{ M}$ ,  $25^\circ\text{C}$ ).

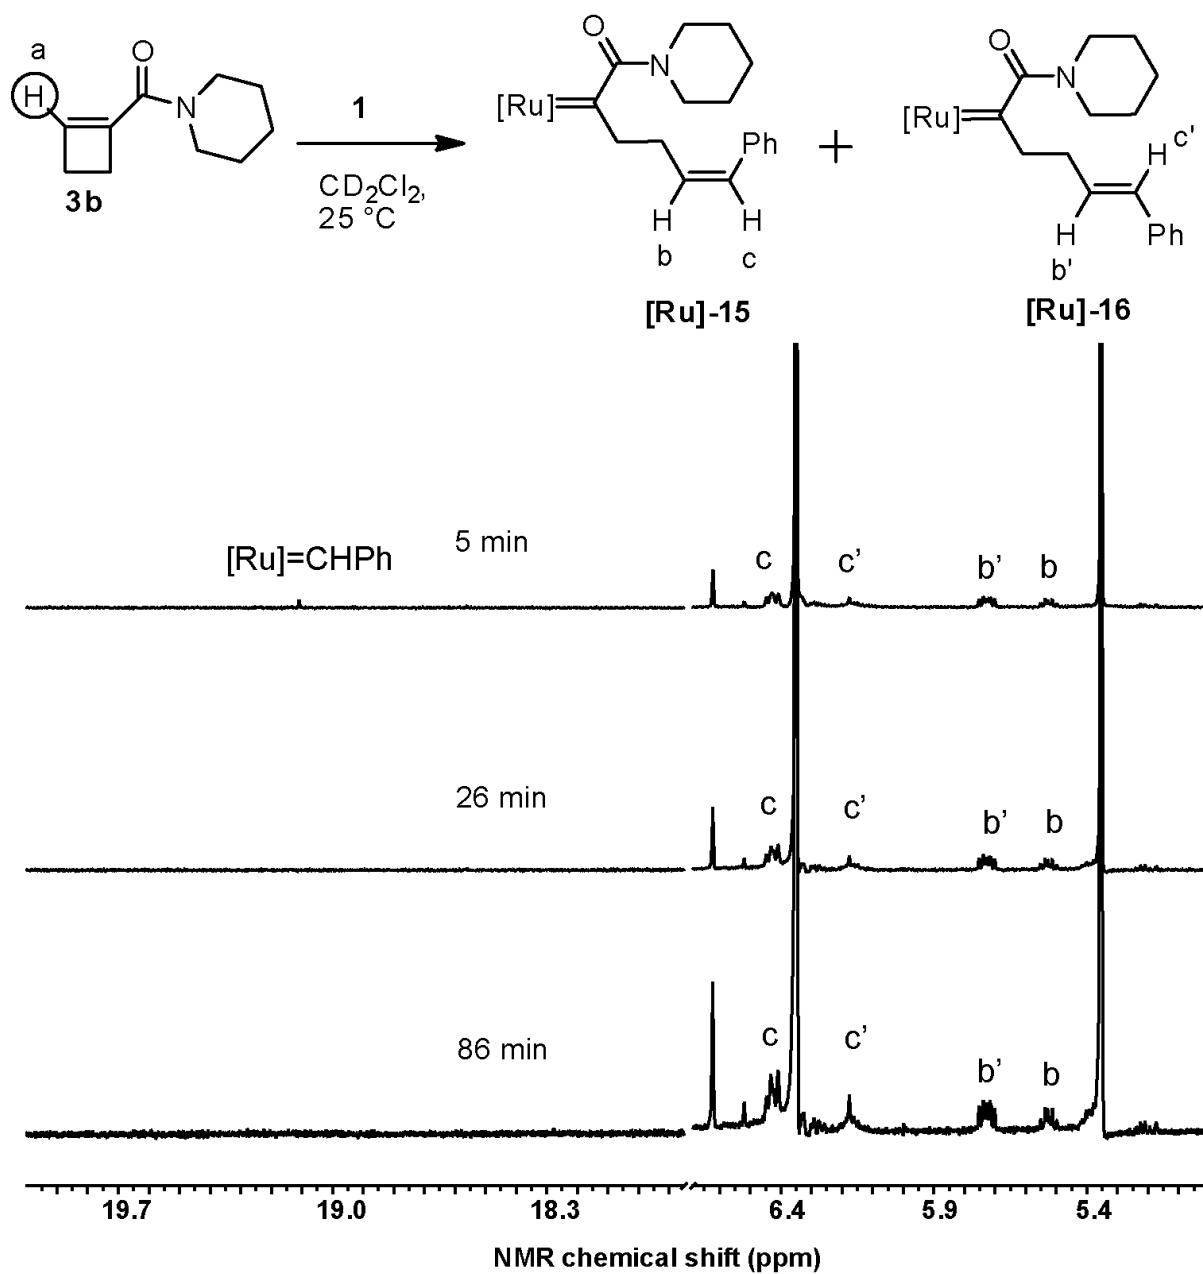



**Figure S4.** ROM of esters **4**. Conversion yield represents the molar ratio of consumed monomer to the initial monomer before ROM. All the data were collected by comparing the integration of the signals for monomer and the signals for the propagating polymer chains in the  $^1\text{H}$  NMR spectra.

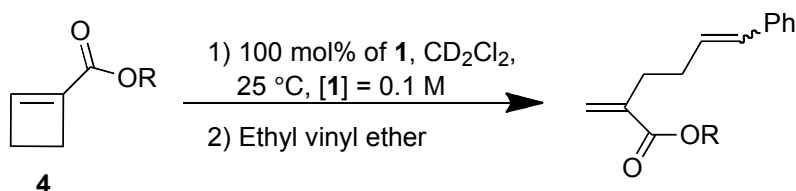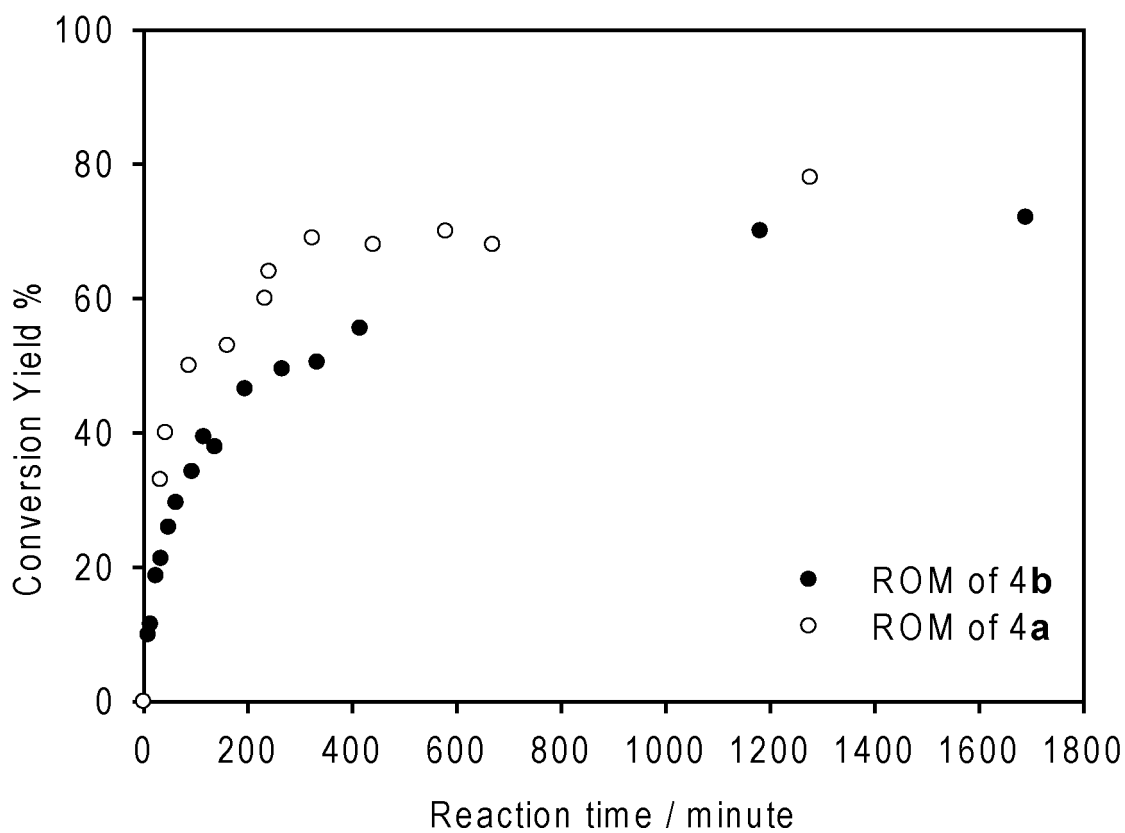

**Figure S5.**  $^1\text{H-NMR}$  spectra of ROM of monomer **4a** in  $\text{CD}_2\text{Cl}_2$  ( $[\mathbf{4a}] = 0.1 \text{ M}$ ,  $[\mathbf{1}] = 0.1 \text{ M}$ ,  $25^\circ\text{C}$ ).

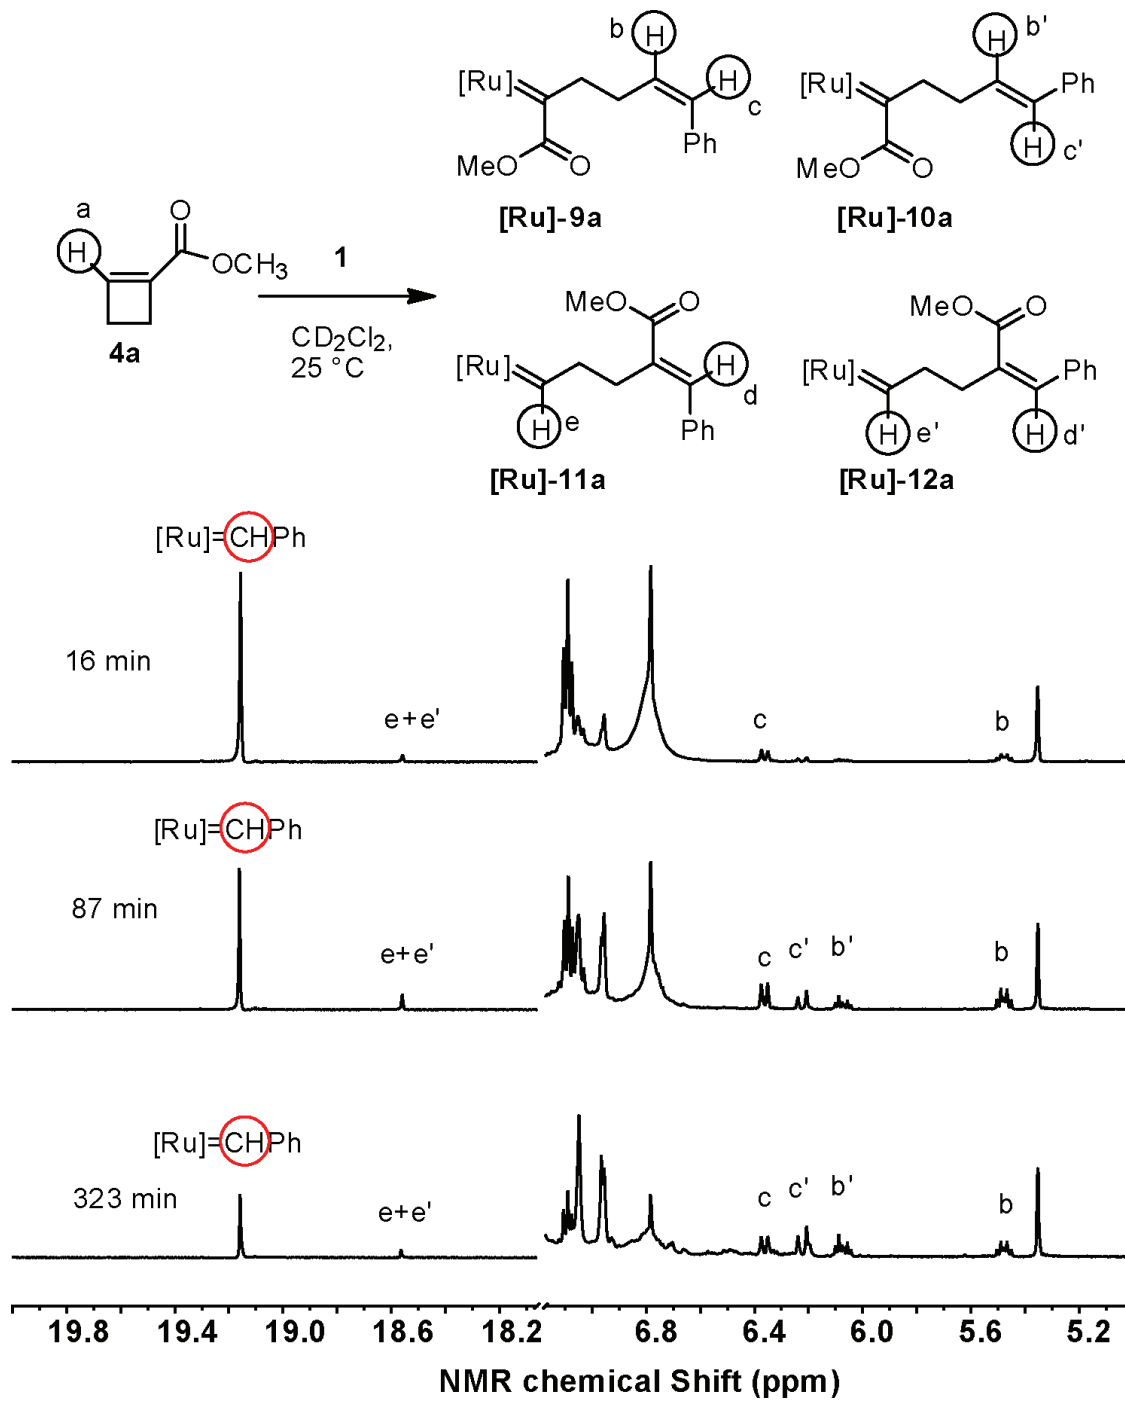

**Figure S6.**  $^1\text{H}$ -NMR spectrum of the 1-mer reaction products **9a** and **10a**.

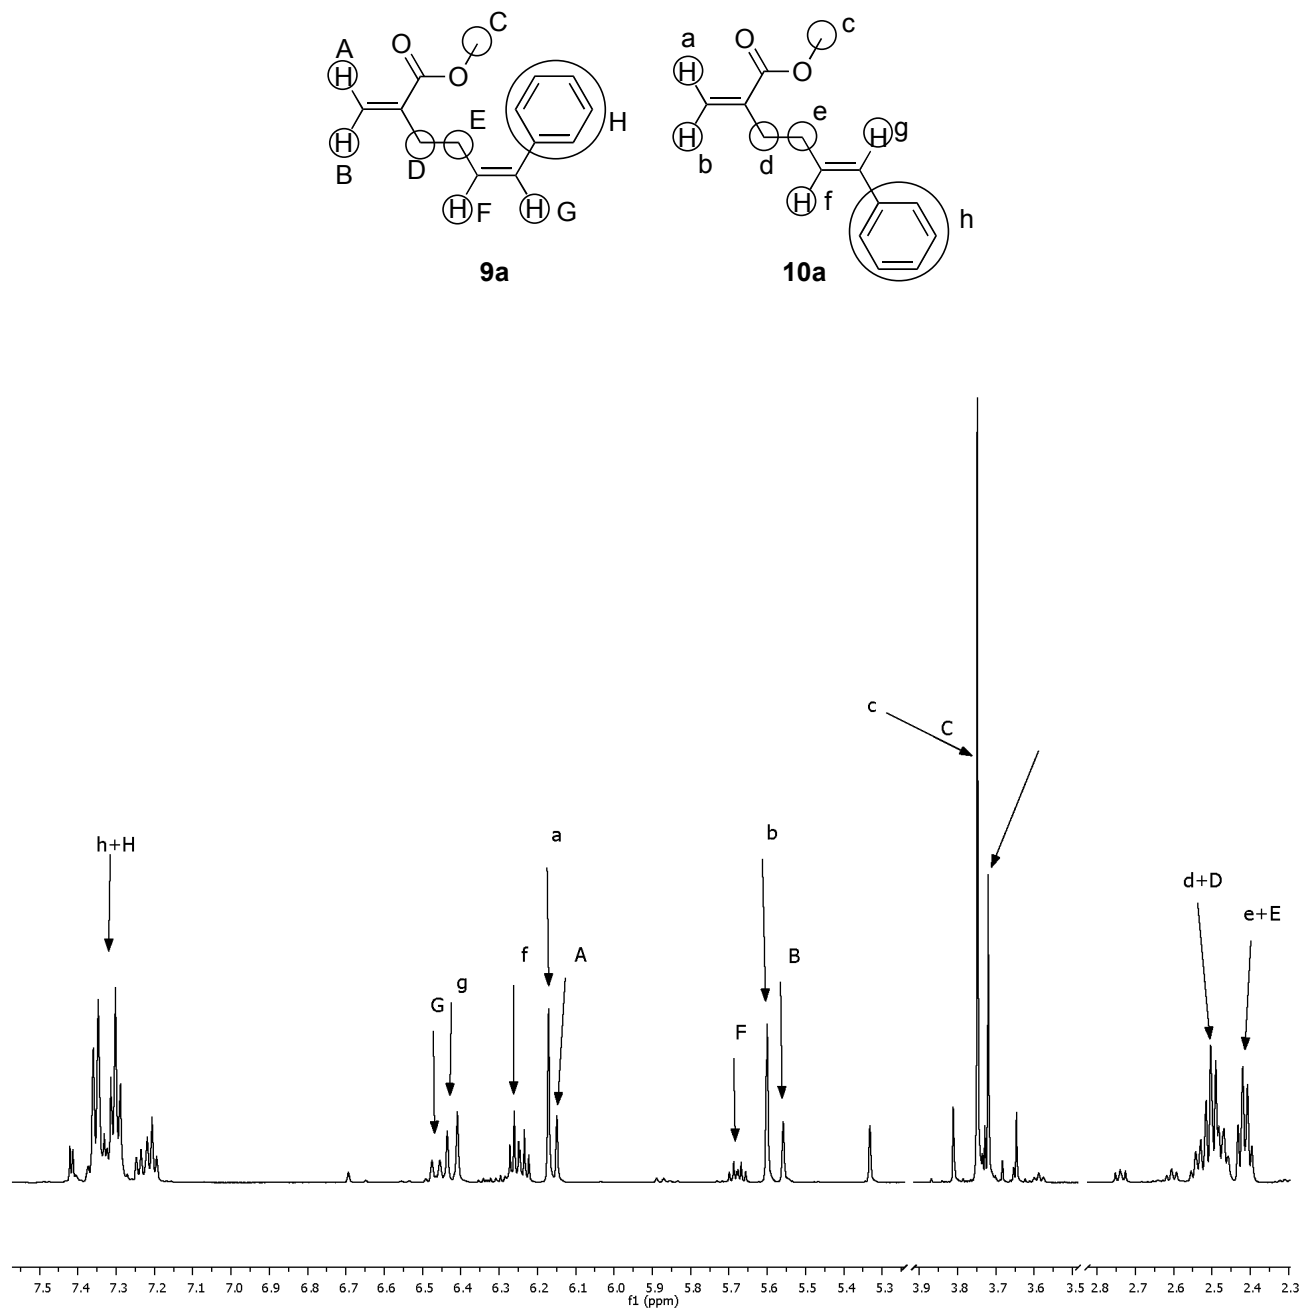

**Figure S7.** ROMP of carbinol esters **5**. Conversion yield represents the molar ratio of consumed monomer to the initial monomer before ROMP. All the data were collected by comparing the integration of the signals for monomer and the signals for the propagating polymer chains in the  $^1\text{H}$  NMR spectra.

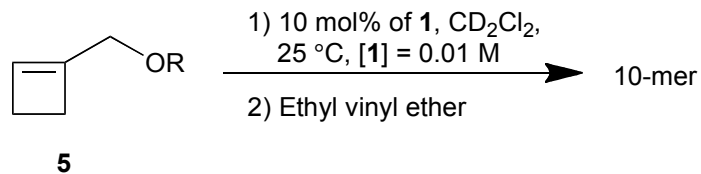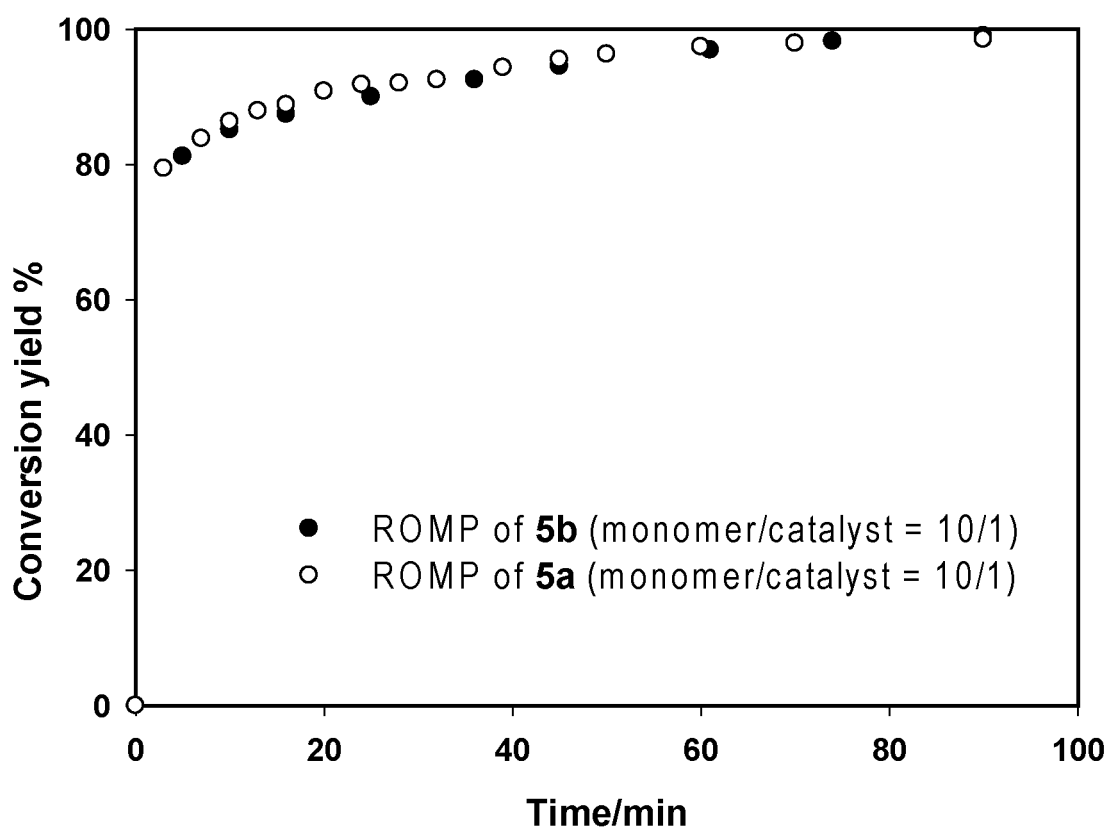

**Figure S8.**  $^1\text{H-NMR}$  spectrum of polymer **13** ( $\text{R} = \text{Ac}$ ). The letters indicate the protons in the structure. E, Z: *E*-configuration and *Z*-configuration in the olefins of the structure.

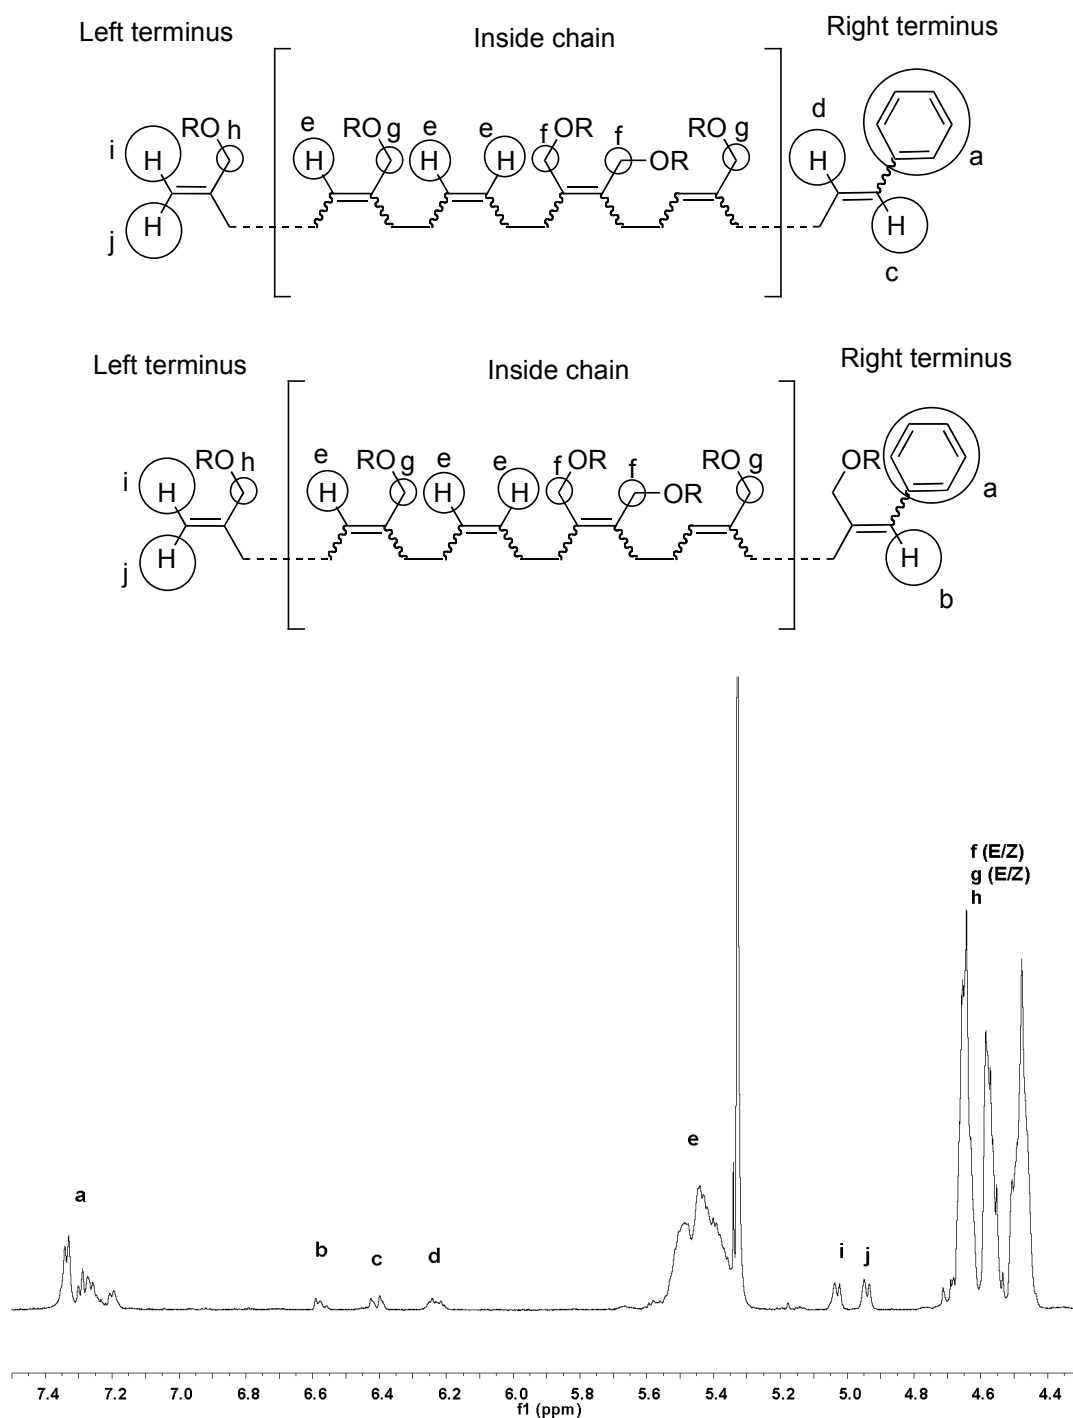

**Figure S9.** Structures of possible intermediates and ring opened products for ROMP of secondary amides and carbinol esters. To simplify the calculations, the polymer chain and the 1-carbonyl amide group, were modeled as a methyl group and a CONHCH<sub>3</sub> substituent, respectively.

### Secondary Amide

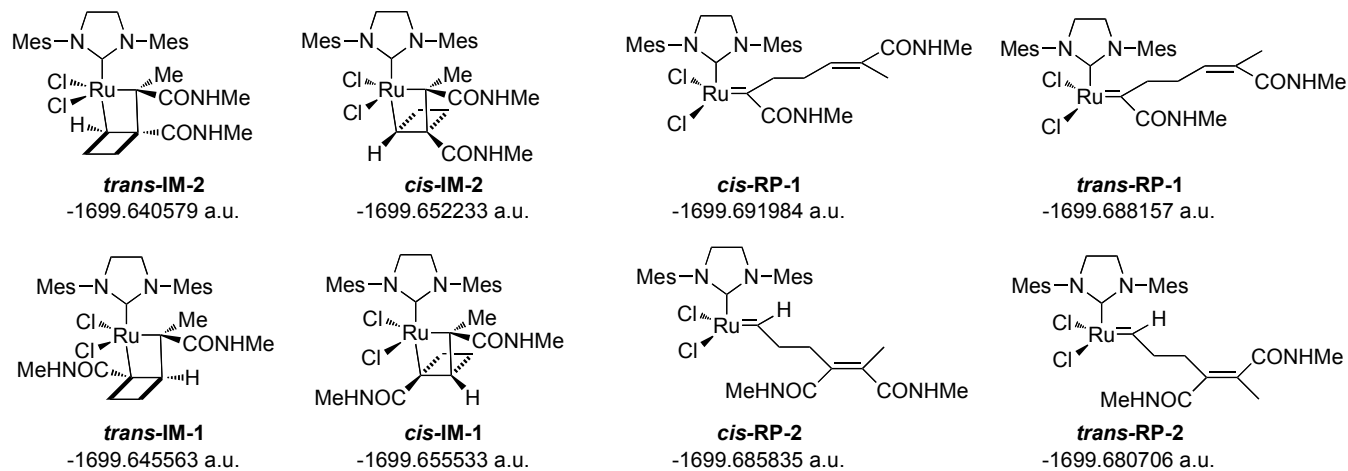

### Carbinol Ester

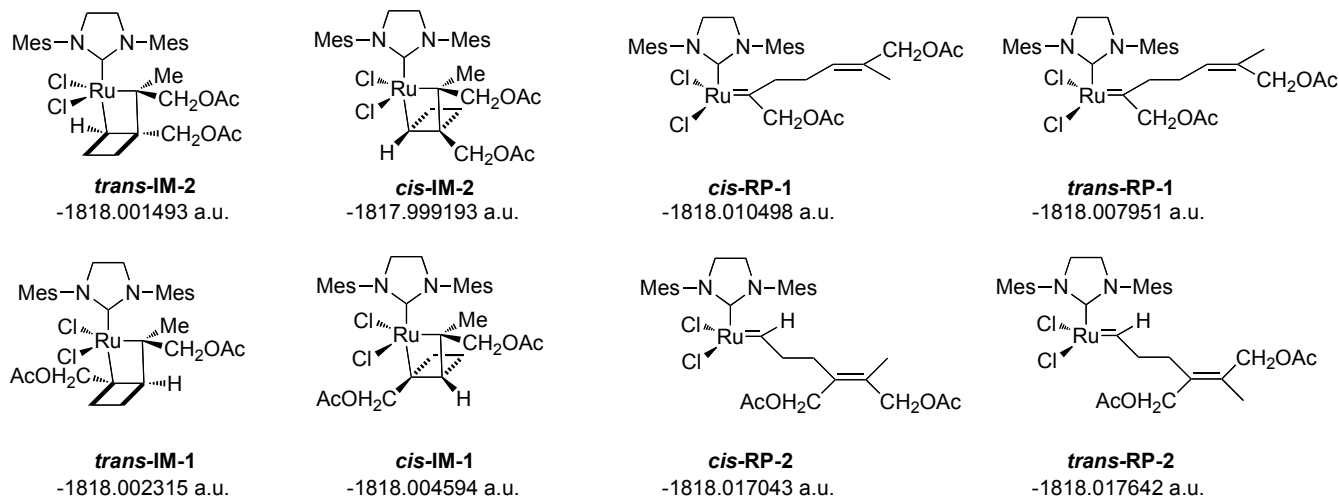

**Table S1.** gHMQC-derived  $^1\text{H}$ - $^{13}\text{C}$  NMR correlation of the 10-mer reaction product **14**.

| Assignment                        | $^1\text{H}$ -NMR ( $\delta$ ) | $^{13}\text{C}$ -NMR ( $\delta$ ) |
|-----------------------------------|--------------------------------|-----------------------------------|
| Phenyl group                      | 7.27                           | 129.0                             |
| Inside vinyl group                | 5.44                           | 130.0                             |
|                                   | 4.64                           | 63.4                              |
| Methylene in the functional group | 4.57                           | 62.1                              |
|                                   | 4.46                           | 68.6                              |
| Methylene in the polymer backbone | 2.17 (2.40-1.94)               | 35.7, 31.4, 28.8, 27.0            |
| Trimethyl group                   | 1.18                           | 27.5                              |

**Table S2.** ROMP reactions monitored by <sup>1</sup>H-NMR spectroscopy.<sup>a</sup>

| Polymer        | Monomer<br>(0.06 mmol) | Catalyst <b>1</b> |
|----------------|------------------------|-------------------|
| <b>18</b>      | <b>2a</b>              | 0.006 mmol        |
| <b>19</b>      | <b>2b</b>              | 0.006 mmol        |
| <b>20</b>      | <b>2c</b>              | 0.006 mmol        |
| <b>21</b>      | <b>2d</b>              | 0.006 mmol        |
| <b>22</b>      | <b>2e</b>              | 0.006 mmol        |
| n/a            | <b>3a</b>              | 0.006 mmol        |
| n/a            | <b>3b</b>              | 0.006 mmol        |
| <b>9a, 10a</b> | <b>4a</b>              | 0.06 mmol         |
| n/a            | <b>4a</b>              | 0.006 mmol        |
| <b>9b, 10b</b> | <b>4b</b>              | 0.06 mmol         |
| n/a            | <b>4b</b>              | 0.006 mmol        |
| <b>13</b>      | <b>5a</b>              | 0.006 mmol        |
| <b>14</b>      | <b>5b</b>              | 0.006 mmol        |

<sup>a</sup>Reaction conditions: CD<sub>2</sub>Cl<sub>2</sub>, 25 °C, [**1**] = 0.1 M.



## References

- (1) Love, J. A.; Morgan, J. P.; Trnka, T. M.; Grubbs, R. H. *Angew. Chem. Int. Ed.* **2002**, 41, 4035-4037.
- (2) Campbell, A.; Rydon, H. N. *J. Chem. Soc.* **1953**, 3002-3008.
- (3) Lee, J. C.; Parker, K. A.; Sampson, N. S. *J. Am. Chem. Soc.* **2006**, 128, 4578-4579.
- (4) Song, A.; Parker, K. A.; Sampson, N. S. *J. Am. Chem. Soc.* **2009**, 131, 3444-5.
- (5) Griffin, R. J.; Arris, C. E.; Bleasdale, C.; Boyle, F. T.; Calvert, A. H.; Curtin, N. J.; Dalby, C.; Kanugula, S.; Lembicz, N. K.; Newell, D. R.; Pegg, A. E.; Golding, B. T. *J. Med. Chem.* **2000**, 43, 4071-4083.
- (6) Becke, A. D. *J. Chem. Phys.* **1996**, 104, 1040-1046.
- (7) Becke, A. D. *J. Chem. Phys.* **1993**, 98, 5648-5652.
- (8) Lee, C. T.; Yang, W. T.; Parr, R. G. *Phys. Rev. B* **1988**, 37, 785-789.
- (9) <http://www.chemistry.mcmaster.ca/aimpac/>.
- (10) Sanford, M. S.; Love, J. A.; Grubbs, R. H. *Organometallics* **2001**, 20, 5314-5318.
- (11) Adlhart, C.; Hinderling, C.; Baumann, H.; Chen, P. *J. Am. Chem. Soc.* **2000**, 122, 8204-8214.
- (12) Fomine, S.; Ortega, J. V.; Tlenkopatchev, M. A. *J. Mol. Catal. A-Chem.* **2007**, 263, 121-127.
- (13) Hofmann, P.; Volland, M. A. O.; Hansen, S. M.; Eisentrager, F.; Gross, J. H.; Stengel, K. *J. Organomet. Chem.* **2000**, 606, 88-92.
- (14) Hoffmann, M.; Marciniak, B. *J. Mol. Model.* **2007**, 13, 477-83.
- (15) Cornejo, A.; Fraile, J. M.; Garcia, J. I.; Gil, M. J.; Martinez-Merino, V.; Mayoral, J. A.; Salvatella, L. *Angew. Chem. Int. Ed.* **2005**, 44, 458-461.

- (16) Fomine, S.; Tlenkopatchev, M. A. *Appl. Catal. A-Gen.* **2009**, 355, 148-155.
- (17) Buchmeiser, M. R.; Wang, D. R.; Zhang, Y.; Naumov, S.; Wurst, K. *Eur. J. Inorg. Chem.* **2007**, 3988-4000.
- (18) Straub, B. F. *Adv. Synth. Catal.* **2007**, 349, 204-214.
- (19) Chou, H. H.; Lin, Y. C.; Huang, S. L.; Liu, Y. H.; Wang, Y. *Organometallics* **2008**, 27, 5212-5220.
- (20) Cantat, T.; Demange, M.; Mezailles, N.; Ricard, L.; Jean, Y.; Le Floch, P. *Organometallics* **2005**, 24, 4838-4841.
- (21) Occhipinti, G.; Bjorsvik, H. R.; Jensen, V. R. *J. Am. Chem. Soc.* **2006**, 128, 6952-6964.
- (22) Fomine, S.; Tlenkopatchev, M. A. *Organometallics* **2007**, 26, 4491-4497.
- (23) Cabeza, J. A.; Del Rio, I.; Miguel, D.; Perez-Carreno, E.; Sanchez-Vega, M. G. *Dalton Trans.* **2008**, 1937-42.
- (24) Wang, D.; Wurst, K.; Knolle, W.; Decker, U.; Prager, L.; Naumov, S.; Buchmeiser, M. R. *Angew. Chem. Int. Ed.* **2008**, 47, 3267-3270.

| Parameter                 | Value                                                  |
|---------------------------|--------------------------------------------------------|
| 1 Data File Name          | D:/ nmr01142008/ 400mhz/ CB-AlaOMe05162007.fid/<br>fid |
| 2 Title                   | CB-AlaOMe05162007                                      |
| 3 Origin                  | inova                                                  |
| 4 Owner                   |                                                        |
| 5 Solvent                 | CDCI3                                                  |
| 6 Pulse Sequence          | s2pul                                                  |
| 7 Acquisition Date        | 2007-06-16T08:59:36                                    |
| 8 Modification Date       |                                                        |
| 9 Temperature             | 25.0                                                   |
| 10 Number of Scans        | 480                                                    |
| 11 Spectrometer Frequency | 399.84                                                 |
| 12 Spectral Width         | 6000.6                                                 |
| 13 Lowest Frequency       | -1000.8                                                |
| 14 Nucleus                | 1H                                                     |

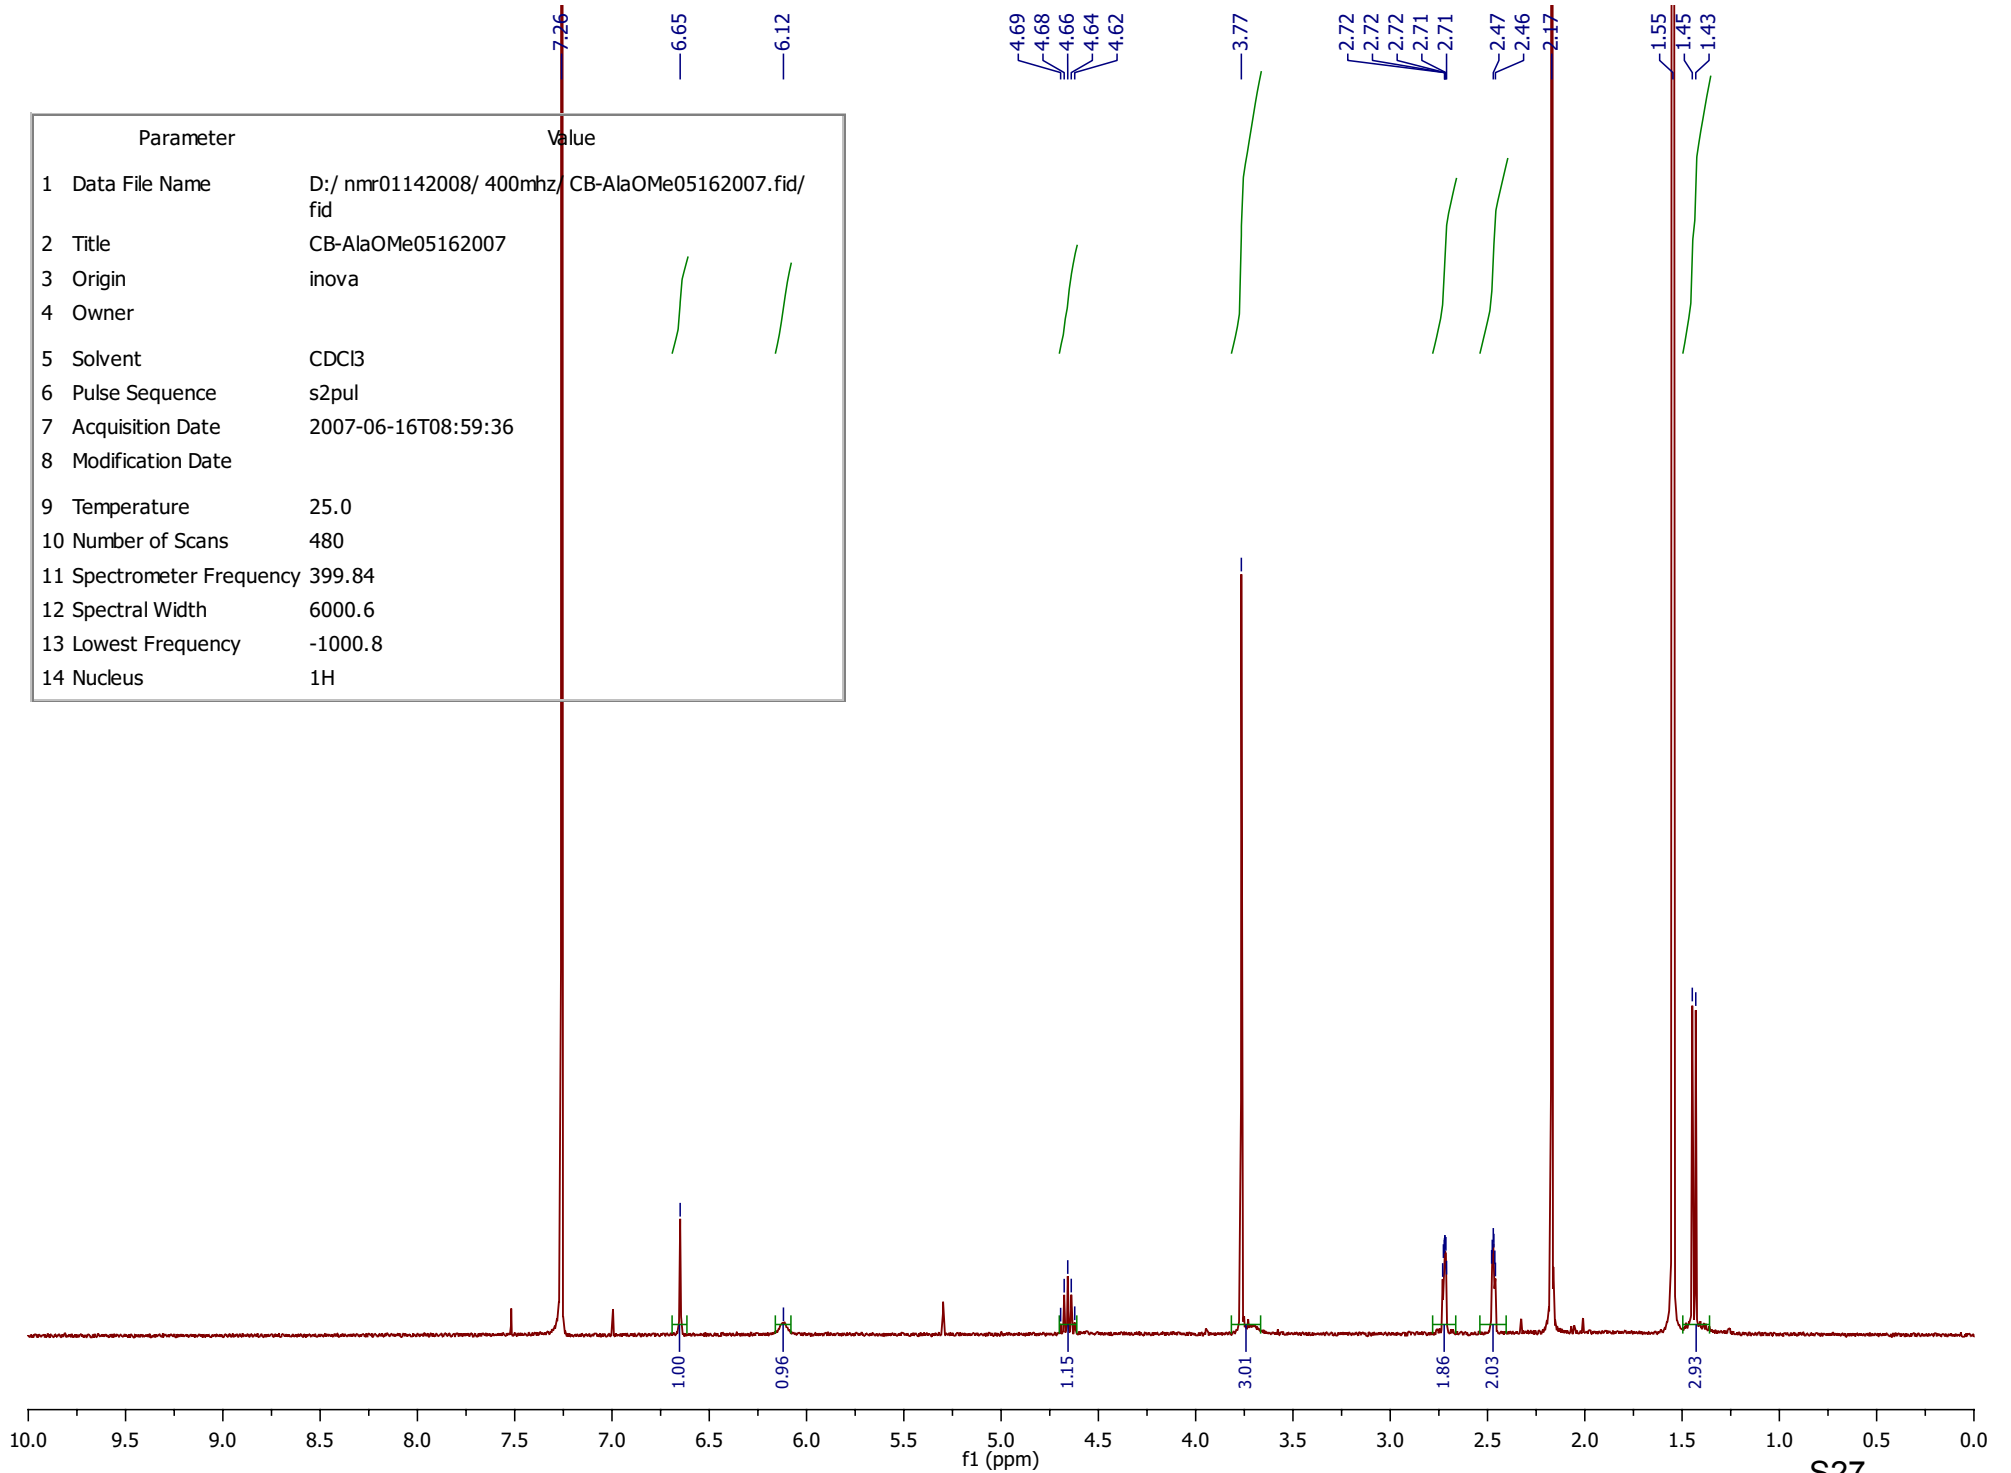

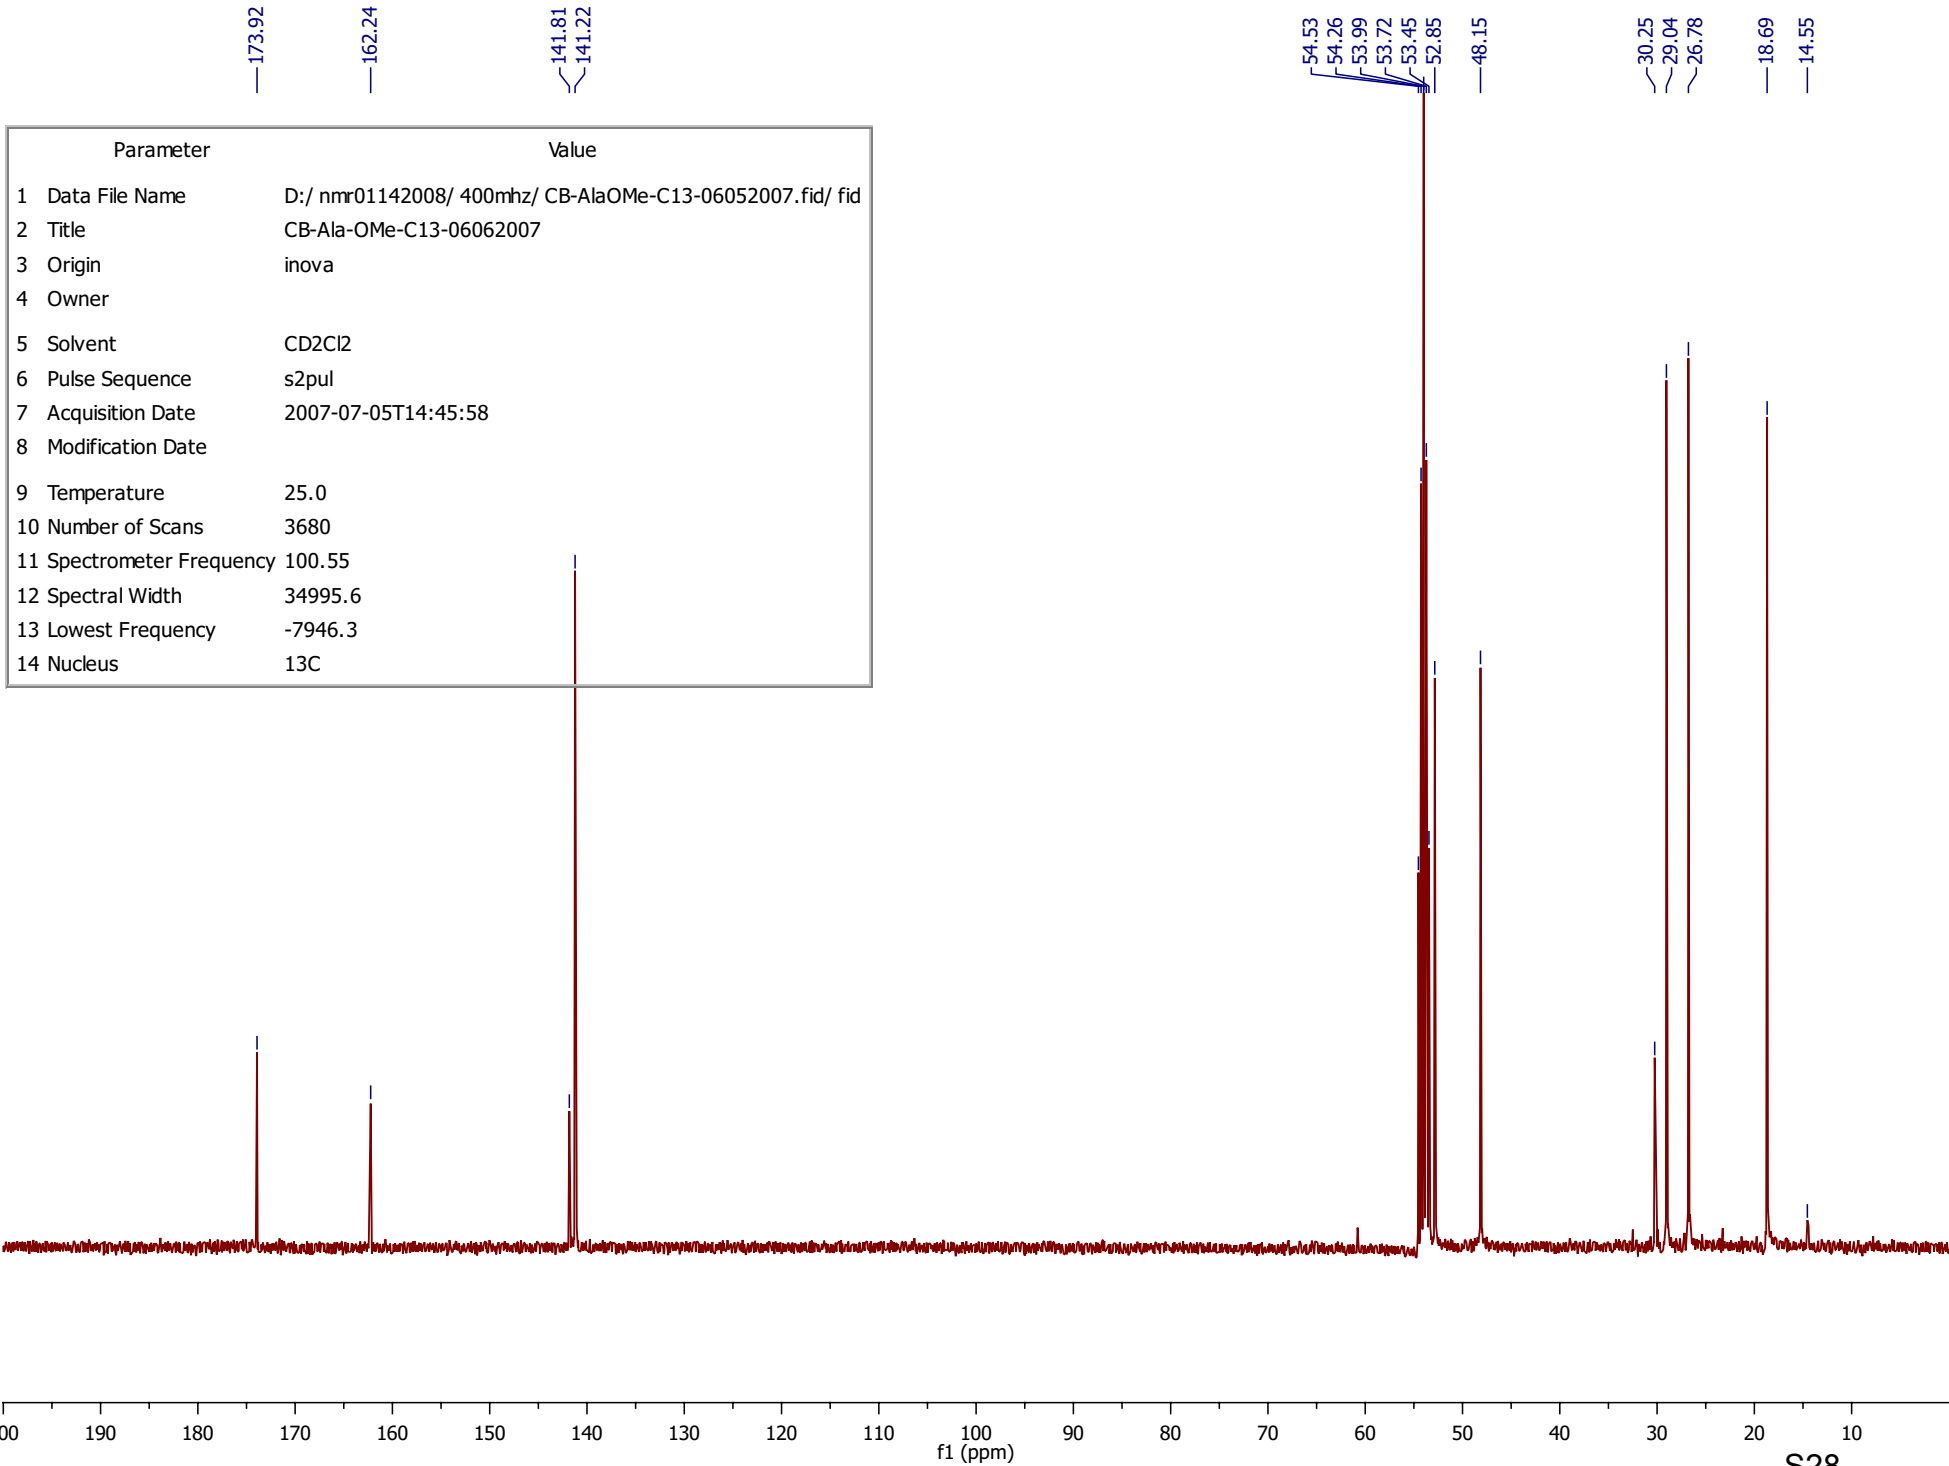

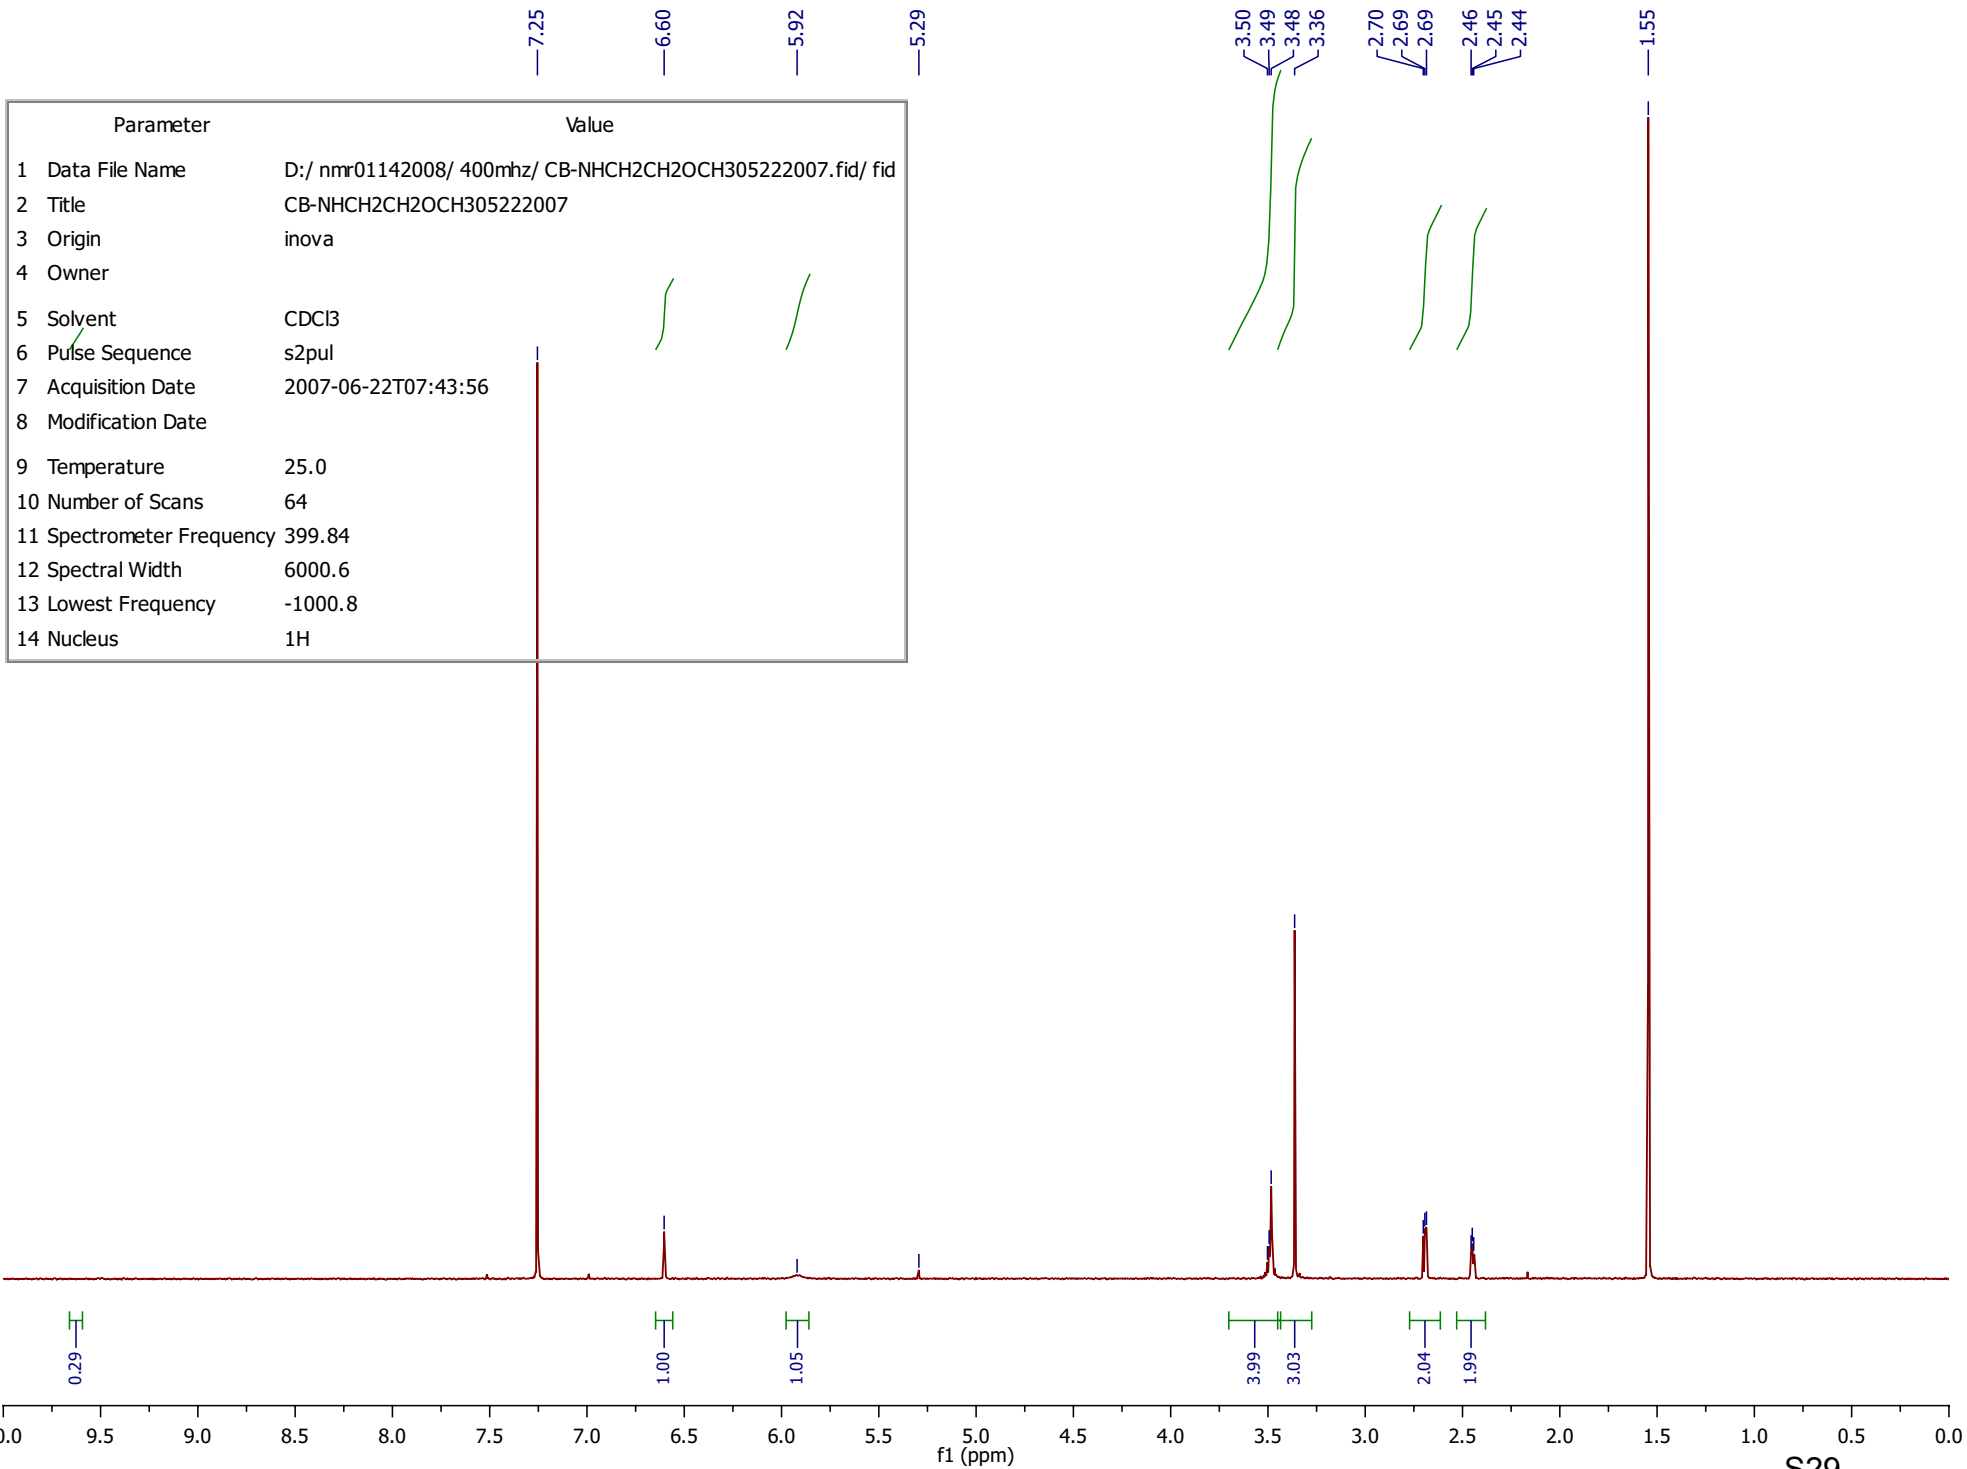

| Parameter                 | Value                                                     |
|---------------------------|-----------------------------------------------------------|
| 1 Data File Name          | D:/ nmr01142008/ 400mhz/ CB-NHCH2CH2OCH305222007.fid/ fid |
| 2 Title                   | CB-NHCH2CH2OCH305222007                                   |
| 3 Origin                  | inova                                                     |
| 4 Owner                   |                                                           |
| 5 Solvent                 | CDCl3                                                     |
| 6 Pulse Sequence          | s2pul                                                     |
| 7 Acquisition Date        | 2007-06-22T07:43:56                                       |
| 8 Modification Date       |                                                           |
| 9 Temperature             | 25.0                                                      |
| 10 Number of Scans        | 64                                                        |
| 11 Spectrometer Frequency | 399.84                                                    |
| 12 Spectral Width         | 6000.6                                                    |
| 13 Lowest Frequency       | -1000.8                                                   |
| 14 Nucleus                | 1H                                                        |

| Parameter                 | Value                                                                        |
|---------------------------|------------------------------------------------------------------------------|
| 1 Data File Name          | F:/nmr032508-041508/ CBNHC2H4OCH3-C13/ CBCONHC2H4OCH3-C13NMR04232008.fid/fid |
| 2 Title                   | CBCONHC2H4OCH3-C13NMR                                                        |
| 3 Origin                  | inova                                                                        |
| 4 Owner                   |                                                                              |
| 5 Solvent                 | CDCl3                                                                        |
| 6 Pulse Sequence          | s2pul                                                                        |
| 7 Acquisition Date        | 2008-05-23T05:56:40                                                          |
| 8 Modification Date       |                                                                              |
| 9 Temperature             | 25.0                                                                         |
| 10 Number of Scans        | 752                                                                          |
| 11 Spectrometer Frequency | 100.55                                                                       |
| 12 Spectral Width         | 25000.0                                                                      |
| 13 Lowest Frequency       | -2986.3                                                                      |
| 14 Nucleus                | 13C                                                                          |
| 15 Acquired Size          | 29984                                                                        |
| 16 Spectral Size          | 65536                                                                        |

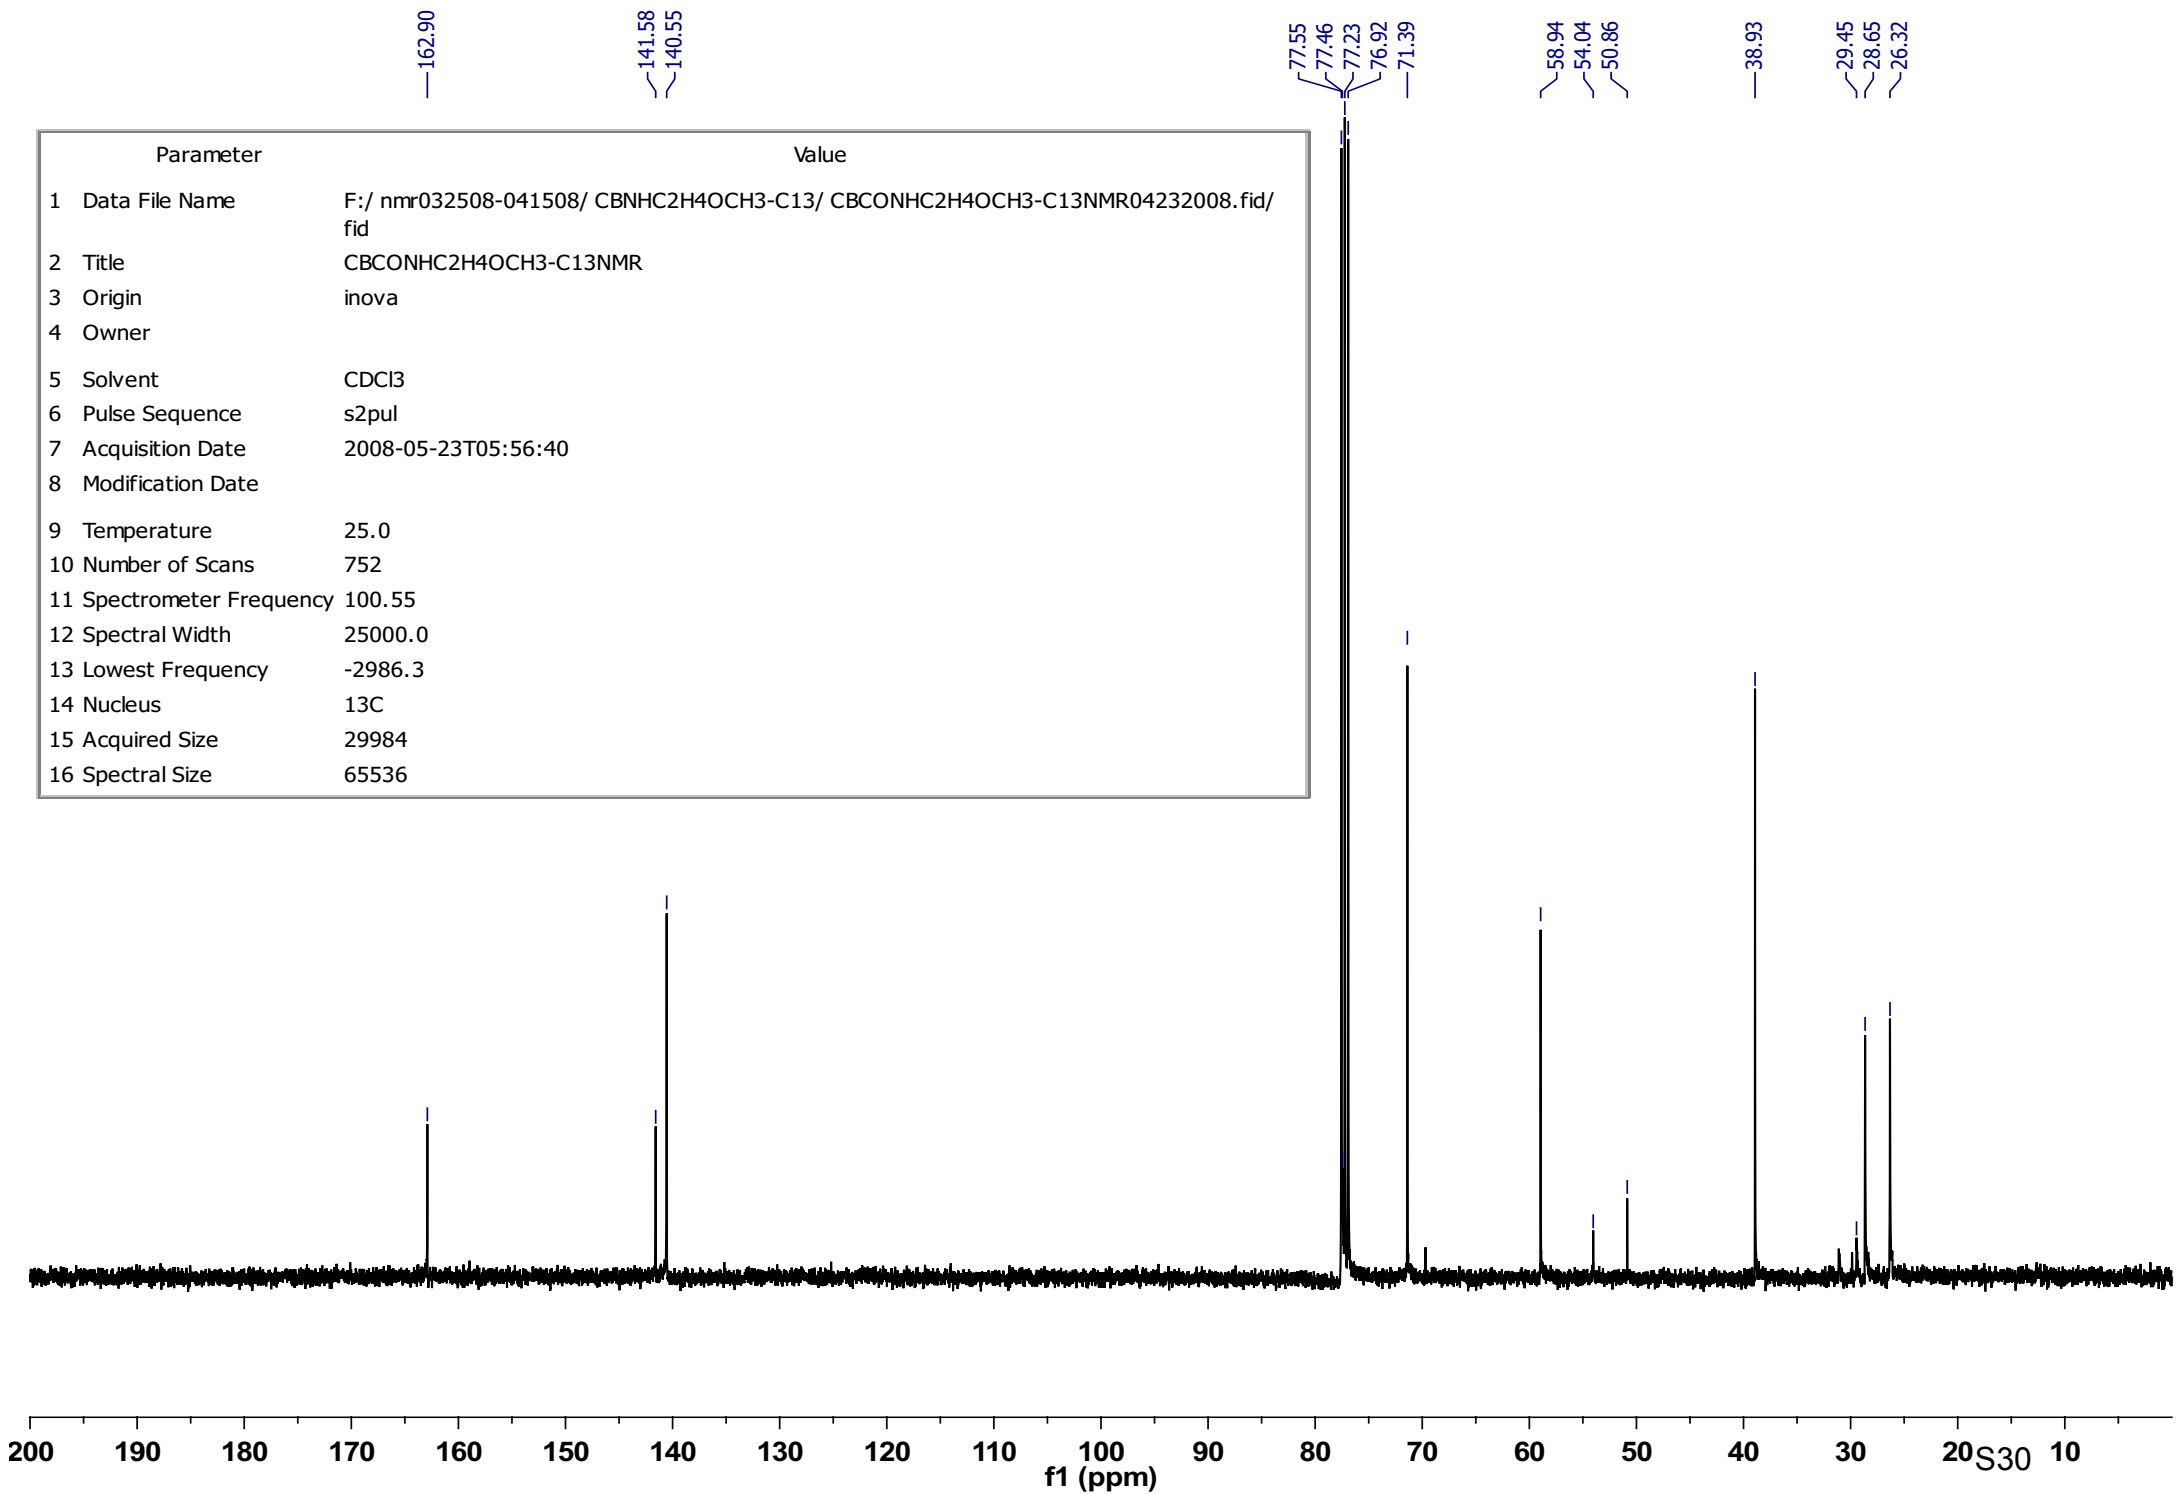

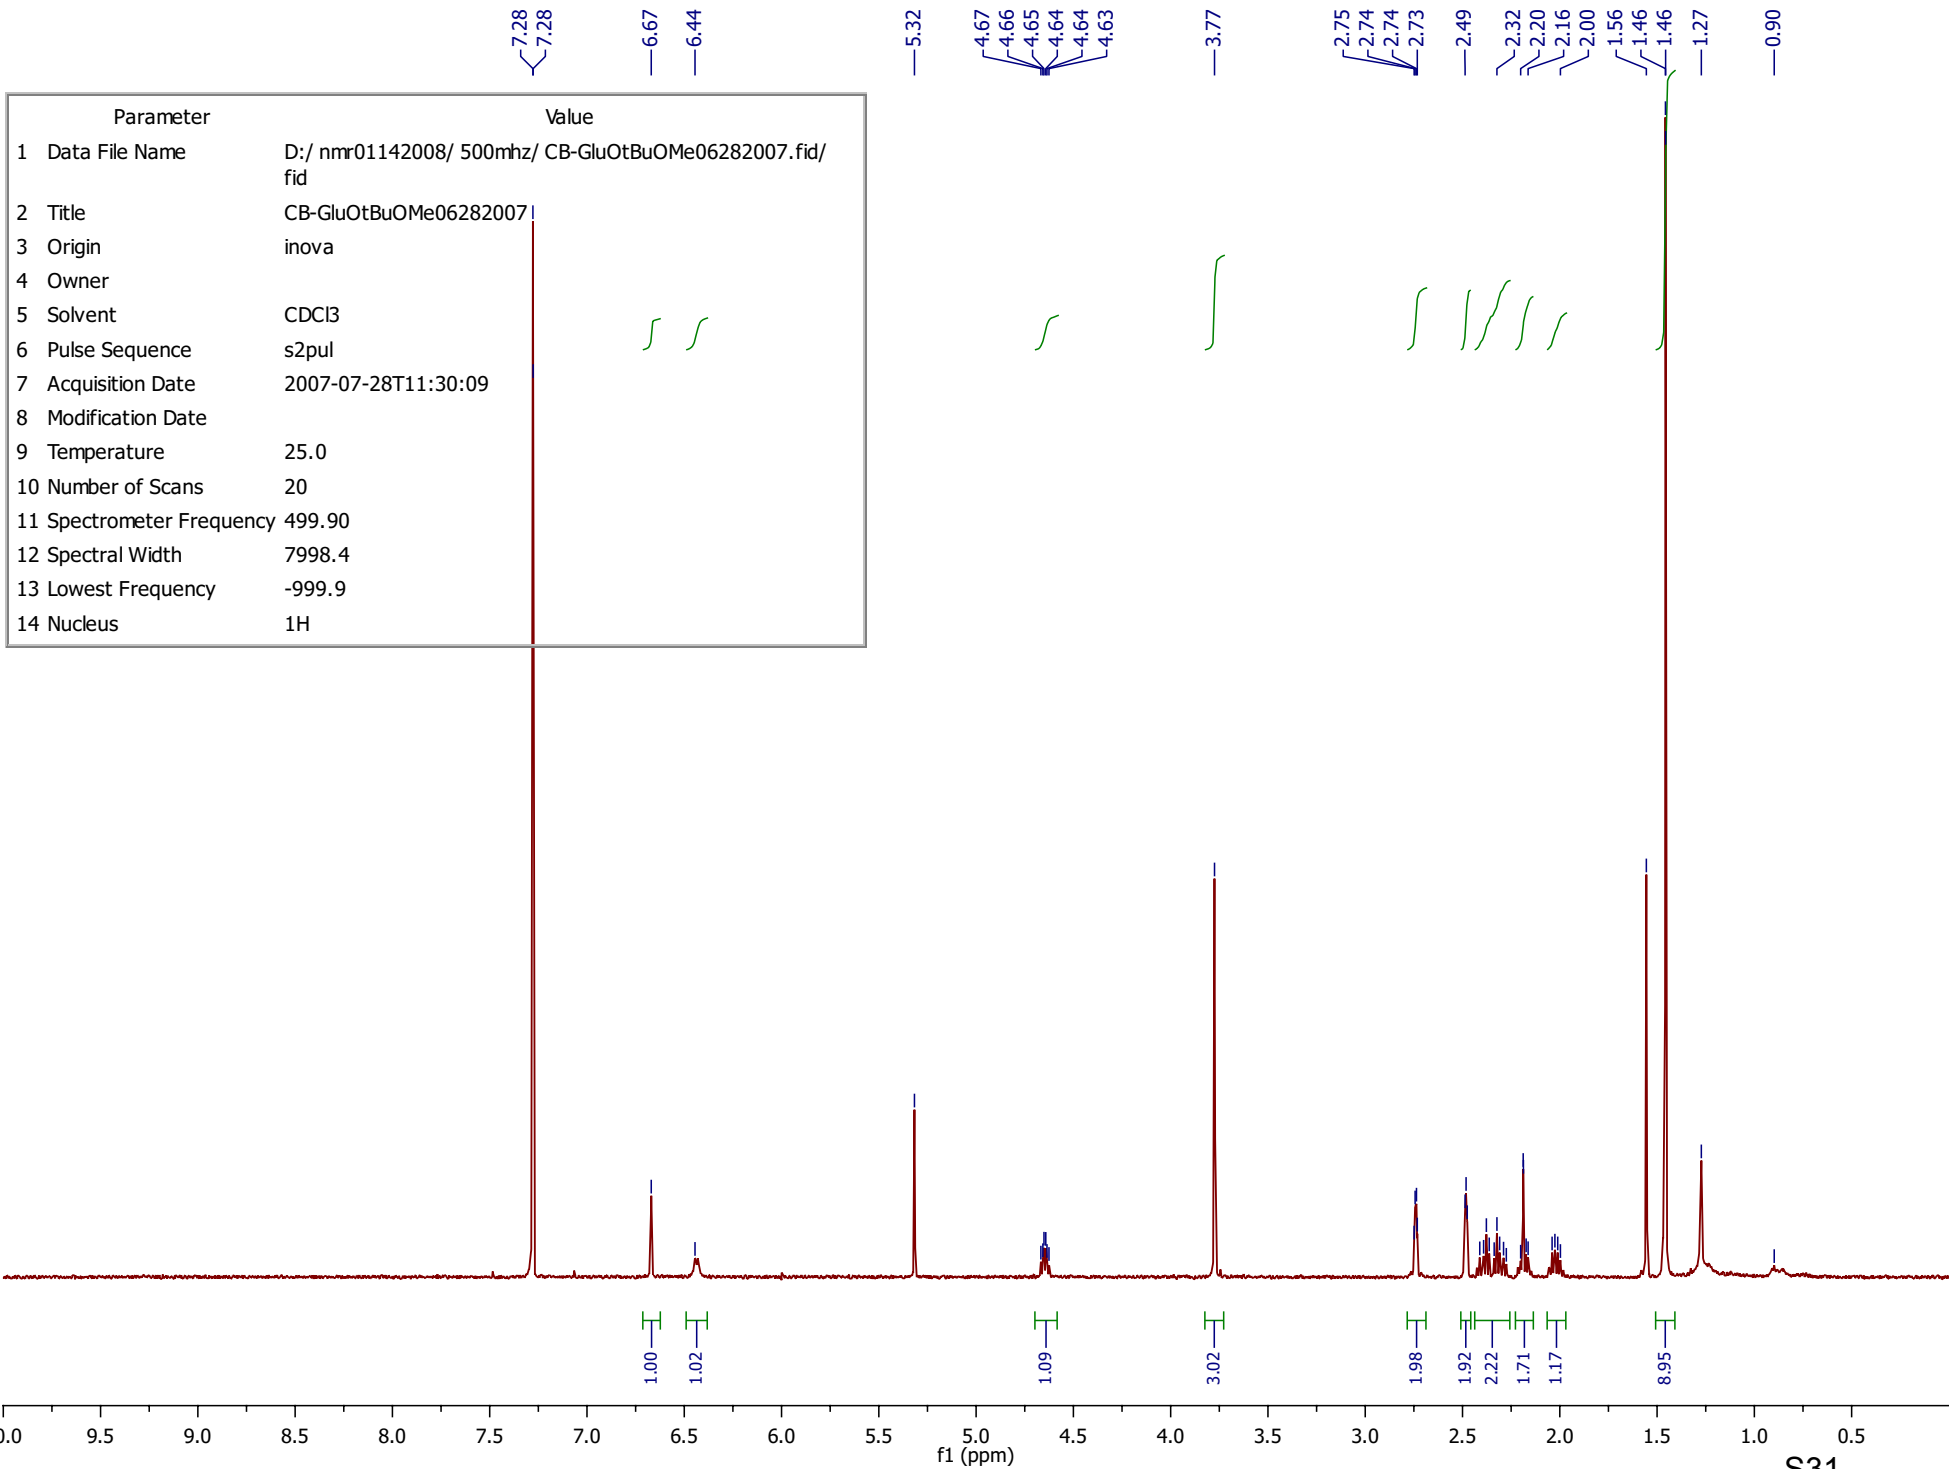

172.81  
172.56

163.64

142.30  
140.80

81.08

53.91  
53.63  
53.36  
53.09  
52.82  
52.18  
51.72  
48.40  
48.19  
47.97  
47.76

31.72  
28.52  
27.58  
26.53  
26.34

| Parameter                 | Value                                                          |
|---------------------------|----------------------------------------------------------------|
| 1 Data File Name          | D:/ nmr01142008/ 400mhz/ CB-GluOtBuOMe-C13NMR09092007.fid/ fid |
| 2 Title                   | CB-GluOtBuOMe-C13                                              |
| 3 Origin                  | inova                                                          |
| 4 Owner                   |                                                                |
| 5 Solvent                 | CD2Cl2                                                         |
| 6 Pulse Sequence          | s2pul                                                          |
| 7 Acquisition Date        | 2007-10-09T16:23:59                                            |
| 8 Modification Date       |                                                                |
| 9 Temperature             | 25.0                                                           |
| 10 Number of Scans        | 20872                                                          |
| 11 Spectrometer Frequency | 100.55                                                         |
| 12 Spectral Width         | 44994.4                                                        |
| 13 Lowest Frequency       | -12983.3                                                       |
| 14 Nucleus                | 13C                                                            |

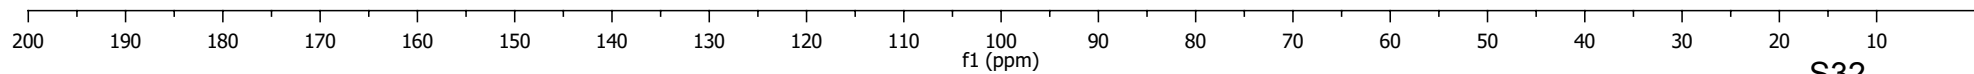



| Parameter                 | Value                                                    |
|---------------------------|----------------------------------------------------------|
| 1 Data File Name          | D:/ nmr01142008/ 400mhz/ CB-NHC3H6PhCH306202007.fid/ fid |
| 2 Title                   | CB-NHC3H6PhCH306202007                                   |
| 3 Origin                  | inova                                                    |
| 4 Owner                   |                                                          |
| 5 Solvent                 | CD2Cl2                                                   |
| 6 Pulse Sequence          | s2pul                                                    |
| 7 Acquisition Date        | 2007-07-20T12:38:57                                      |
| 8 Modification Date       |                                                          |
| 9 Temperature             | 25.0                                                     |
| 10 Number of Scans        | 320                                                      |
| 11 Spectrometer Frequency | 399.84                                                   |
| 12 Spectral Width         | 6000.6                                                   |
| 13 Lowest Frequency       | -1000.8                                                  |
| 14 Nucleus                | 1H                                                       |

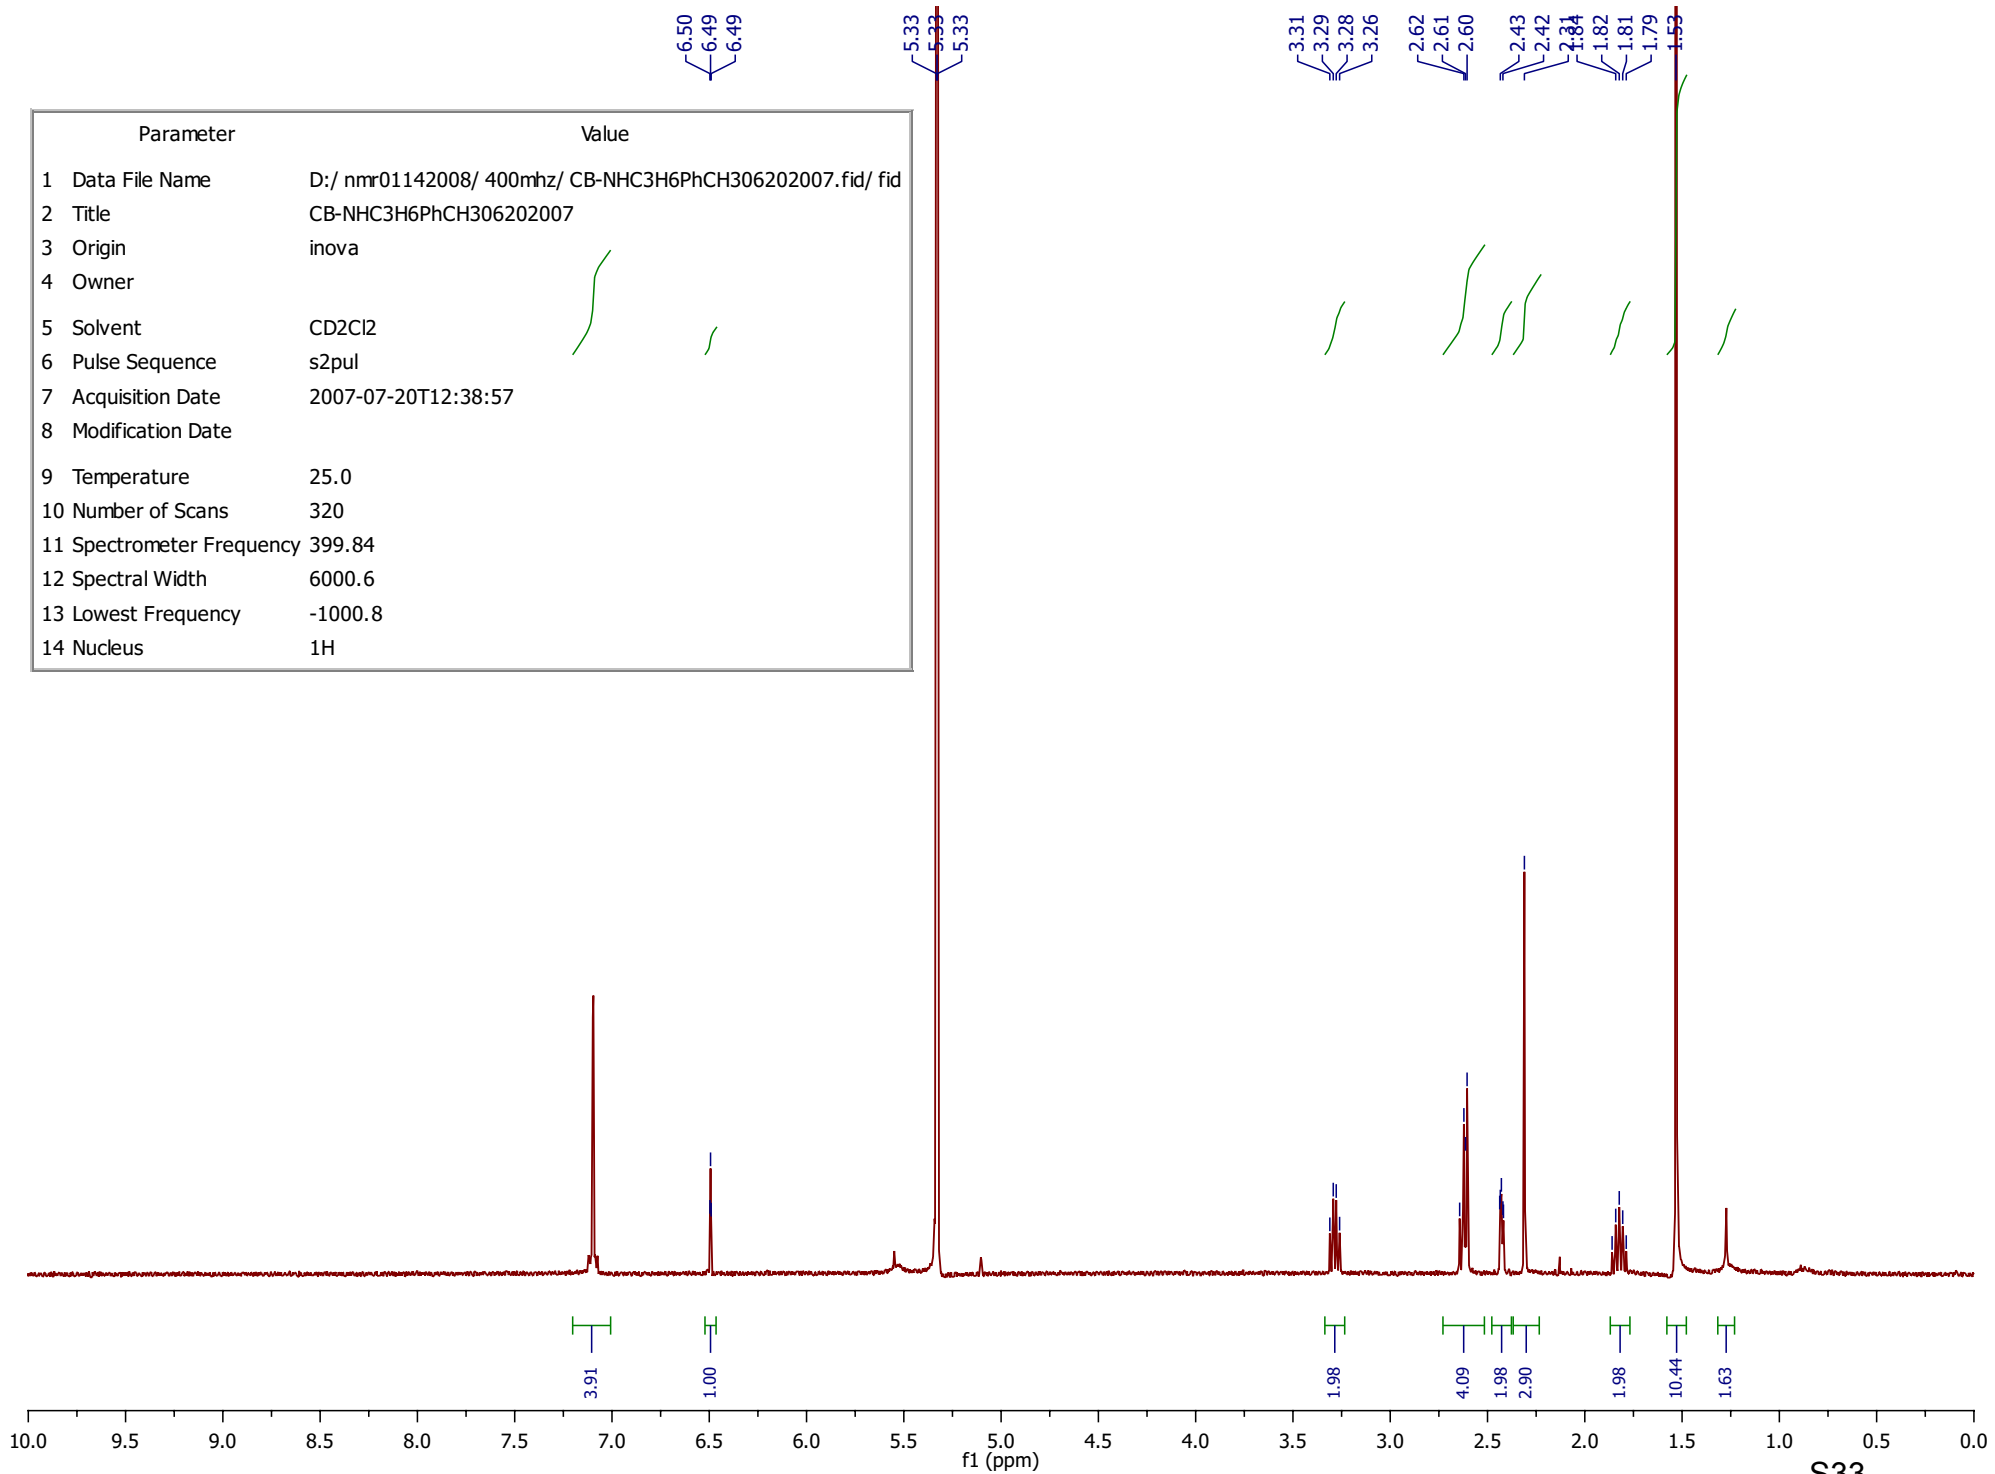

—162.45

—142.06

—139.55

—138.77

—135.66

—129.24

—128.39

—54.16

—53.89

—53.62

—53.35

—53.08

—38.86

—33.07

—31.52

—29.89

—28.59

—26.18

—20.86

| Parameter                 | Value                                                        |
|---------------------------|--------------------------------------------------------------|
| 1 Data File Name          | D:/ nmr01142008/ 400mhz/ CB-NHC3H6PhCH3-C1309102007.fid/ fid |
| 2 Title                   | CB-NHC3H6PhCH3-C13                                           |
| 3 Origin                  | inova                                                        |
| 4 Owner                   |                                                              |
| 5 Solvent                 | CD2Cl2                                                       |
| 6 Pulse Sequence          | s2pul                                                        |
| 7 Acquisition Date        | 2007-10-10T16:06:28                                          |
| 8 Modification Date       |                                                              |
| 9 Temperature             | 25.0                                                         |
| 10 Number of Scans        | 21648                                                        |
| 11 Spectrometer Frequency | 100.55                                                       |
| 12 Spectral Width         | 44994.4                                                      |
| 13 Lowest Frequency       | -12983.3                                                     |
| 14 Nucleus                | 13C                                                          |

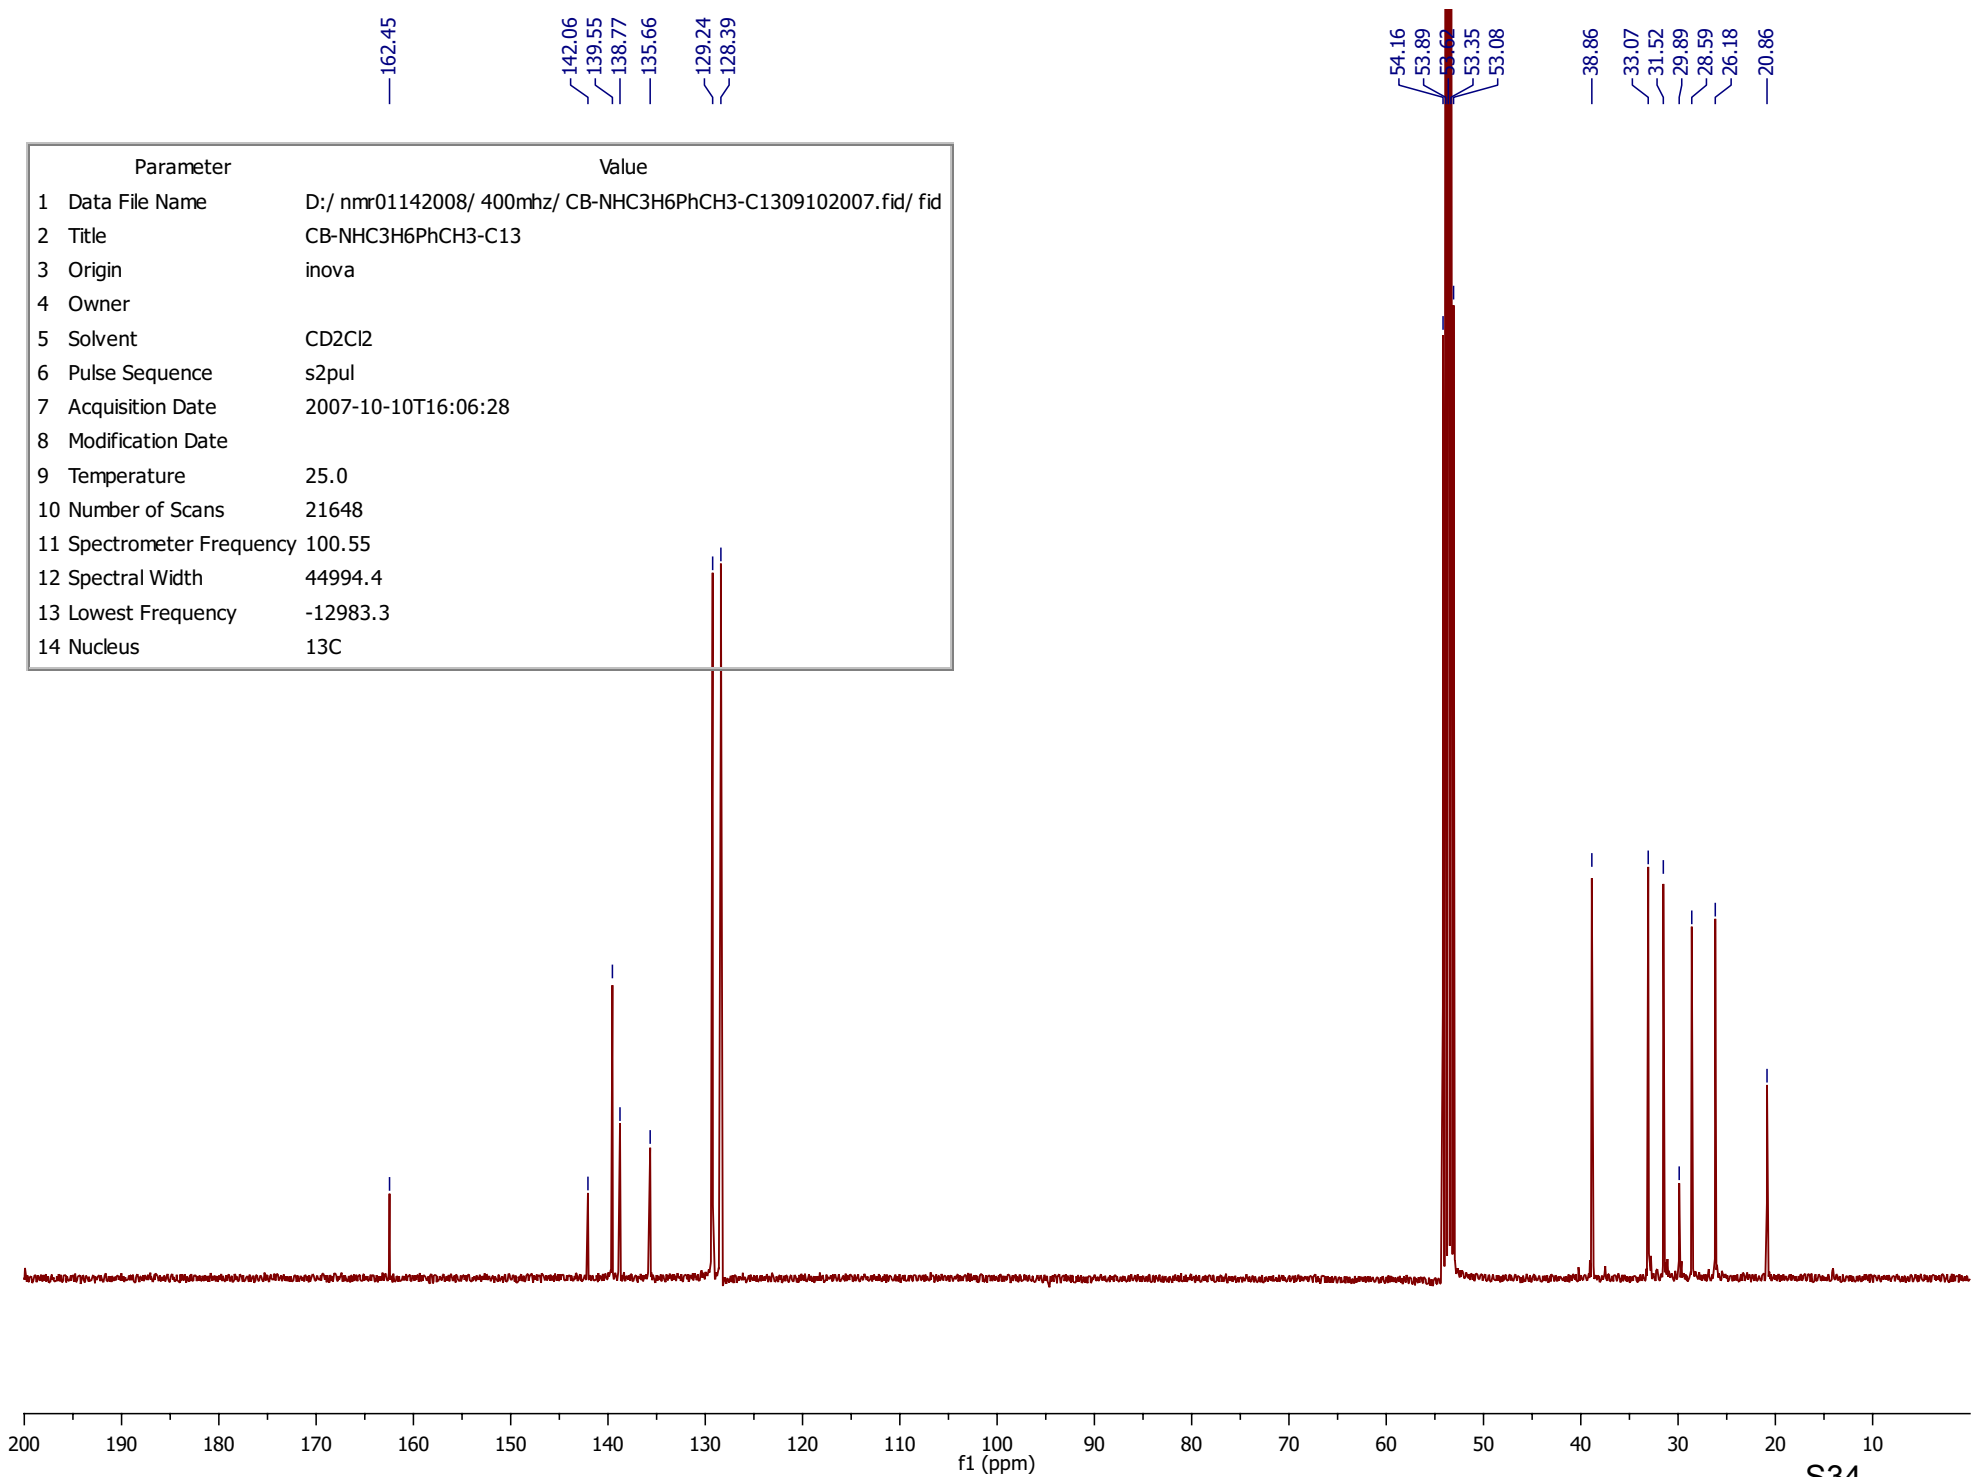

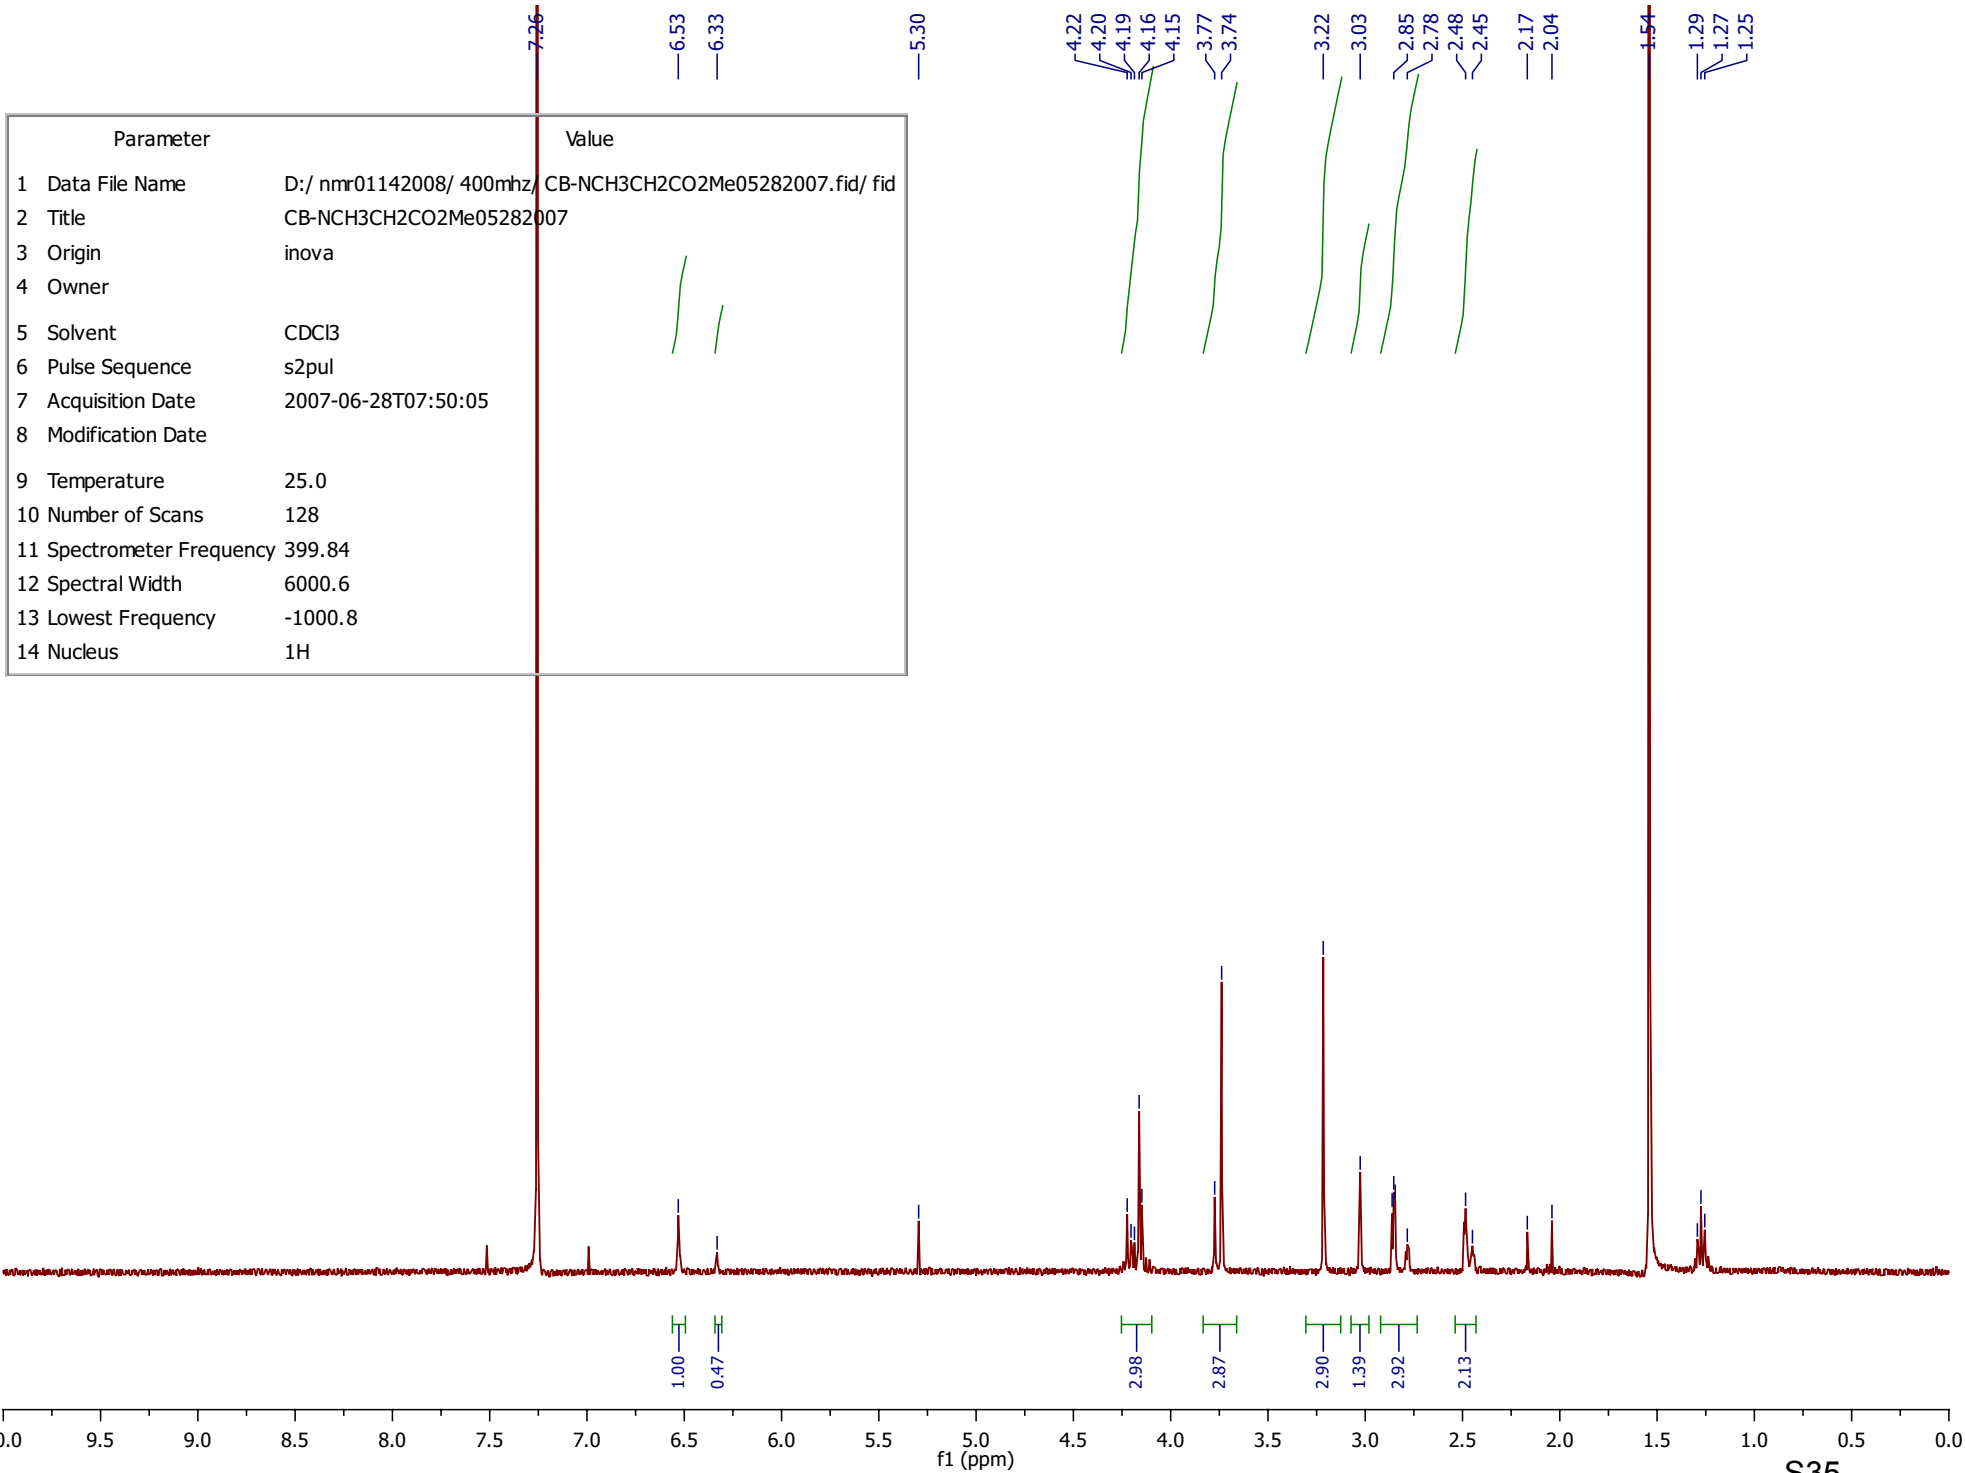

169.97  
169.85  
164.47  
164.06

142.90  
141.13  
140.80

77.55  
77.24  
76.92

52.59  
52.29  
51.96  
49.85  
44.11  
40.97

35.18  
31.56  
28.65  
27.40  
27.29  
26.45

| Parameter                 | Value                                                                                |
|---------------------------|--------------------------------------------------------------------------------------|
| 1 Data File Name          | F:/ nmr032508-041508/ 400-0325200804152008/ CB-NCH3CH2CO2CH3-C13NMR04122008.fid/ fid |
| 2 Title                   | CB-NCH3CH2CO2CH3-C13NMR                                                              |
| 3 Origin                  | inova                                                                                |
| 4 Owner                   |                                                                                      |
| 5 Solvent                 | CDCl3                                                                                |
| 6 Pulse Sequence          | s2pul                                                                                |
| 7 Acquisition Date        | 2008-05-12T08:37:55                                                                  |
| 8 Modification Date       |                                                                                      |
| 9 Temperature             | 25.0                                                                                 |
| 10 Number of Scans        | 1240                                                                                 |
| 11 Spectrometer Frequency | 100.55                                                                               |
| 12 Spectral Width         | 25000.0                                                                              |
| 13 Lowest Frequency       | -2986.3                                                                              |
| 14 Nucleus                | 13C                                                                                  |
| 15 Acquired Size          | 29984                                                                                |
| 16 Spectral Size          | 65536                                                                                |

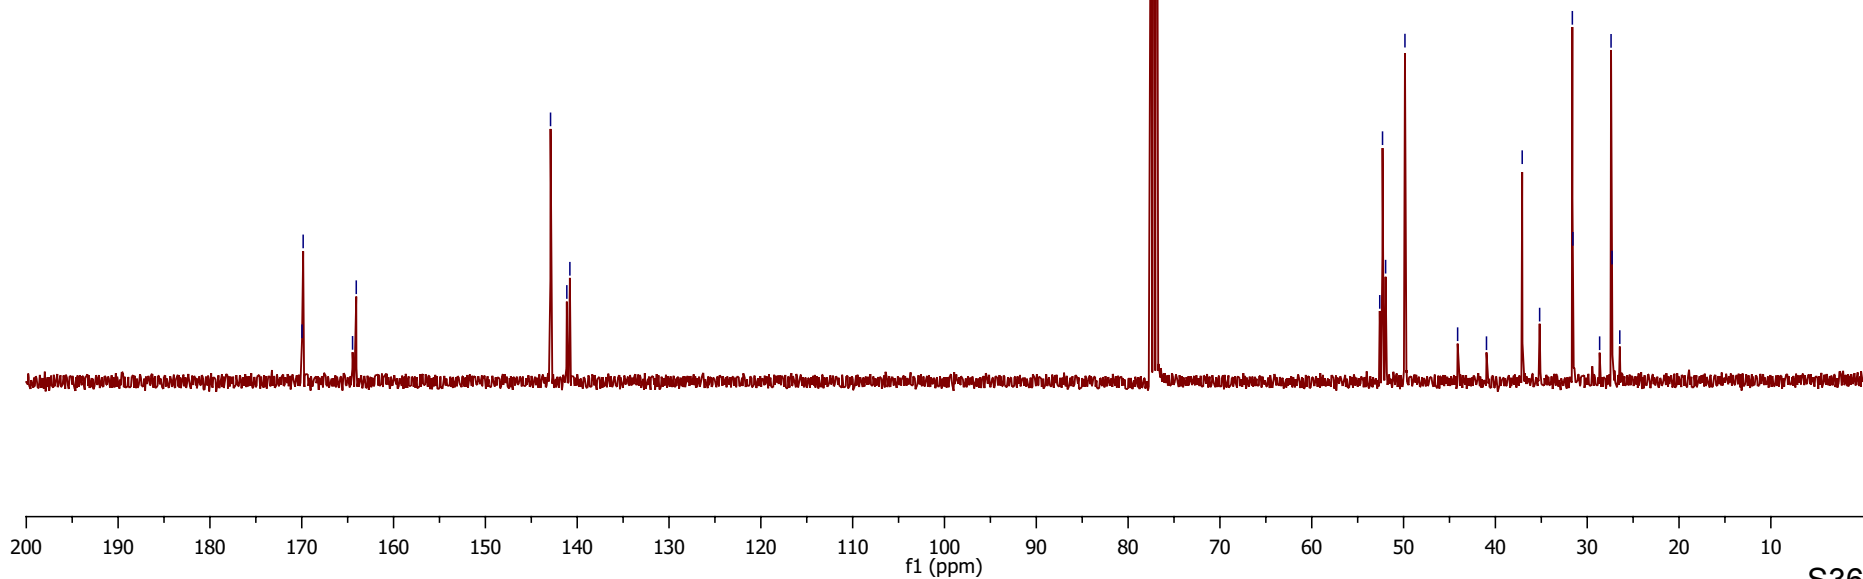

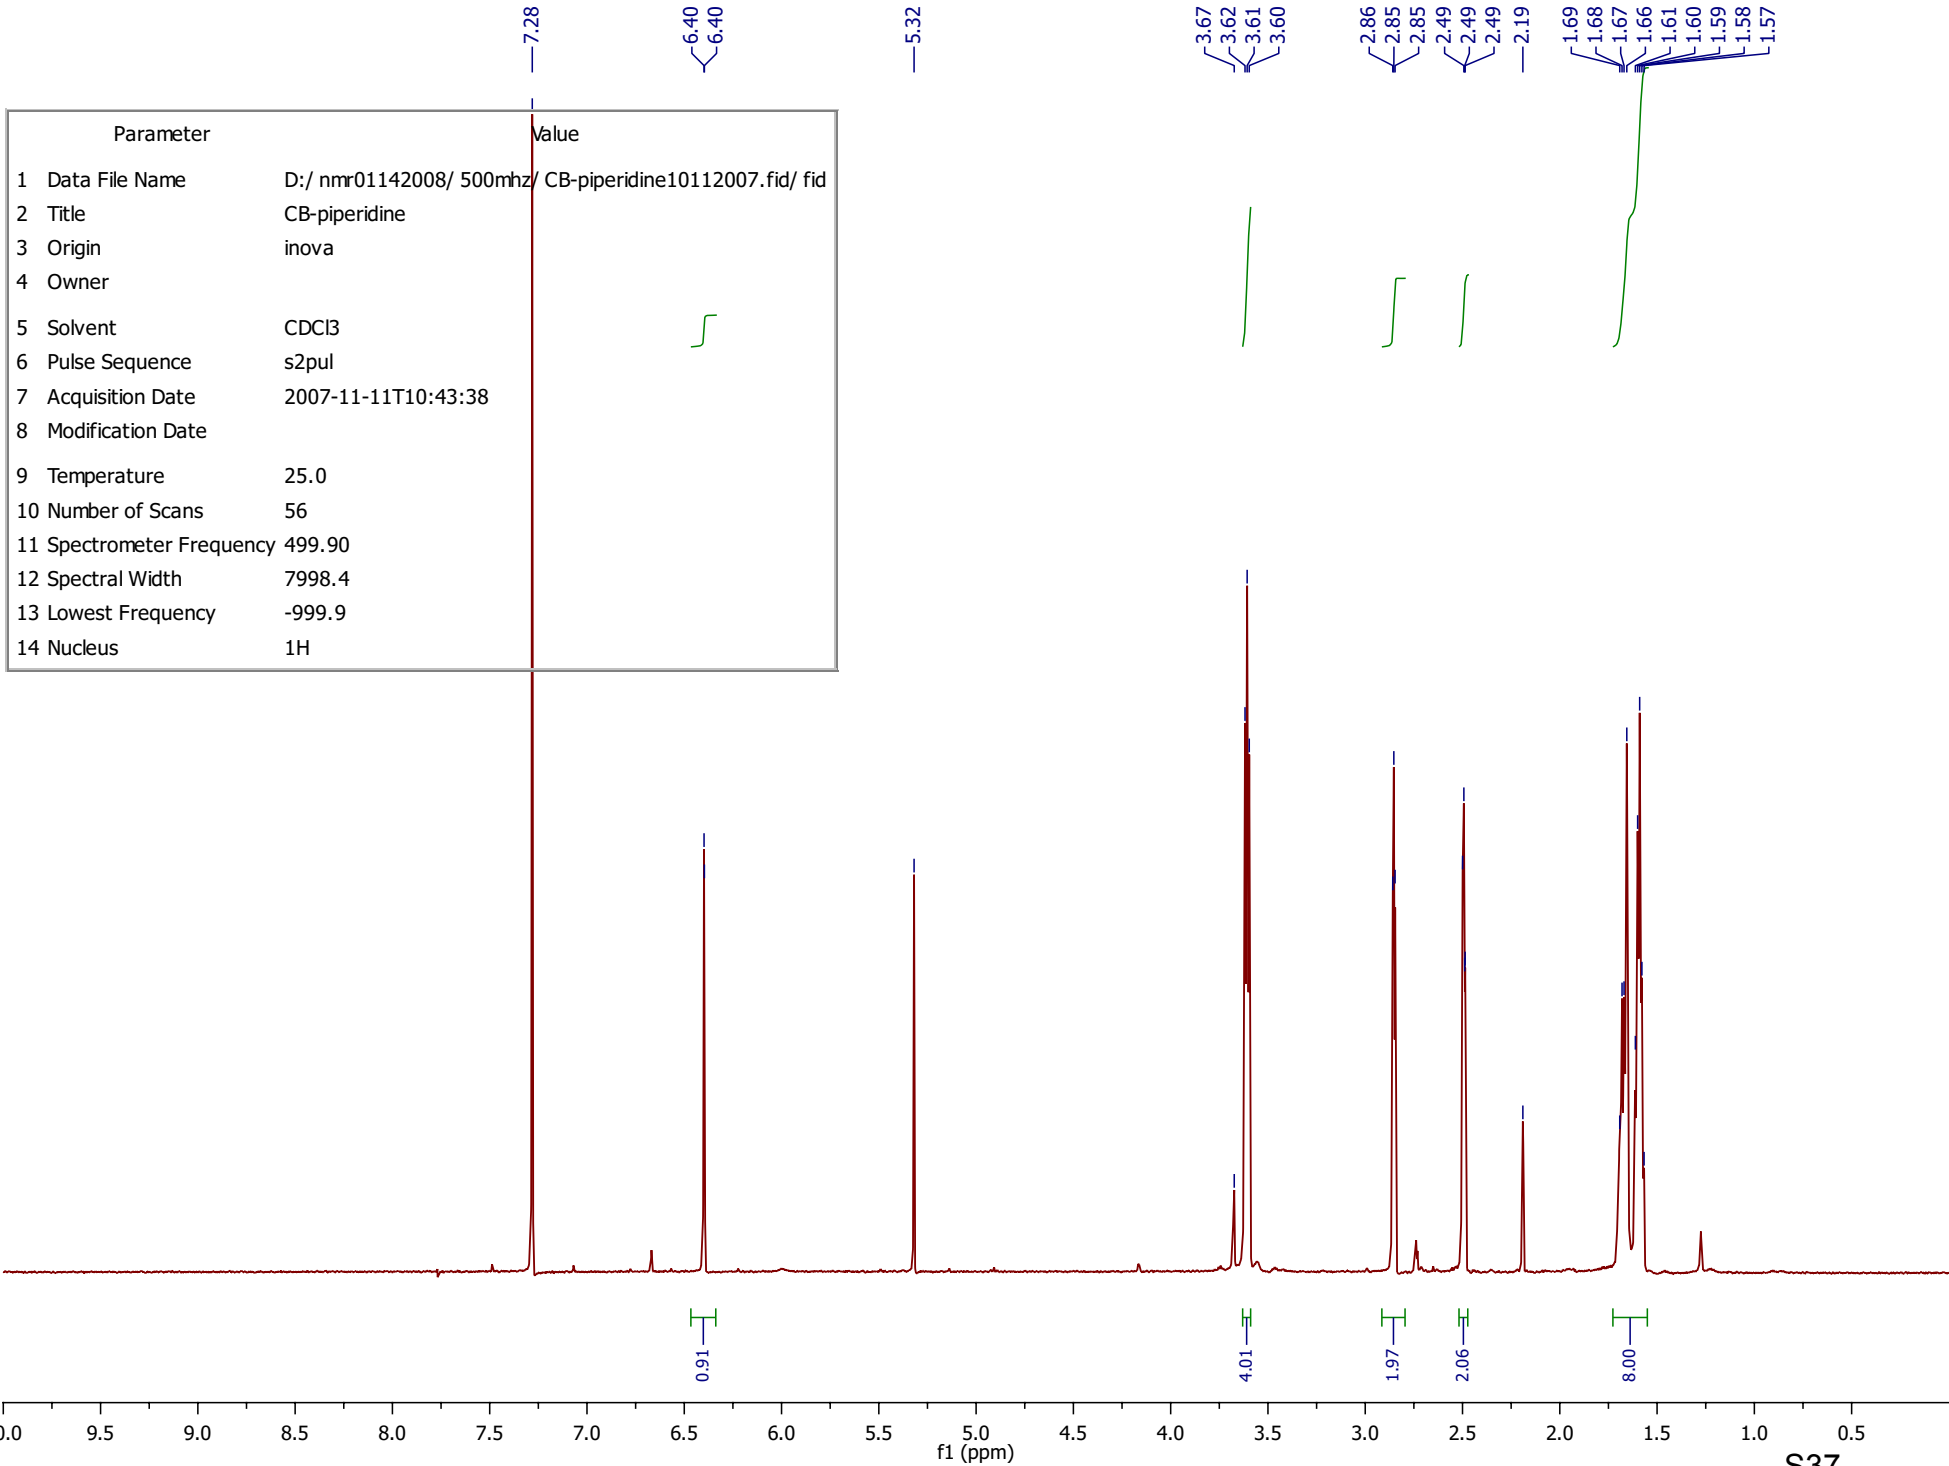

| Parameter                 | Value                                                   |
|---------------------------|---------------------------------------------------------|
| 1 Data File Name          | D:/ nmr01142008/ 500mhz/ CB-piperidine10112007.fid/ fid |
| 2 Title                   | CB-piperidine                                           |
| 3 Origin                  | inova                                                   |
| 4 Owner                   |                                                         |
| 5 Solvent                 | CDCl3                                                   |
| 6 Pulse Sequence          | s2pul                                                   |
| 7 Acquisition Date        | 2007-11-11T10:43:38                                     |
| 8 Modification Date       |                                                         |
| 9 Temperature             | 25.0                                                    |
| 10 Number of Scans        | 56                                                      |
| 11 Spectrometer Frequency | 499.90                                                  |
| 12 Spectral Width         | 7998.4                                                  |
| 13 Lowest Frequency       | -999.9                                                  |
| 14 Nucleus                | 1H                                                      |

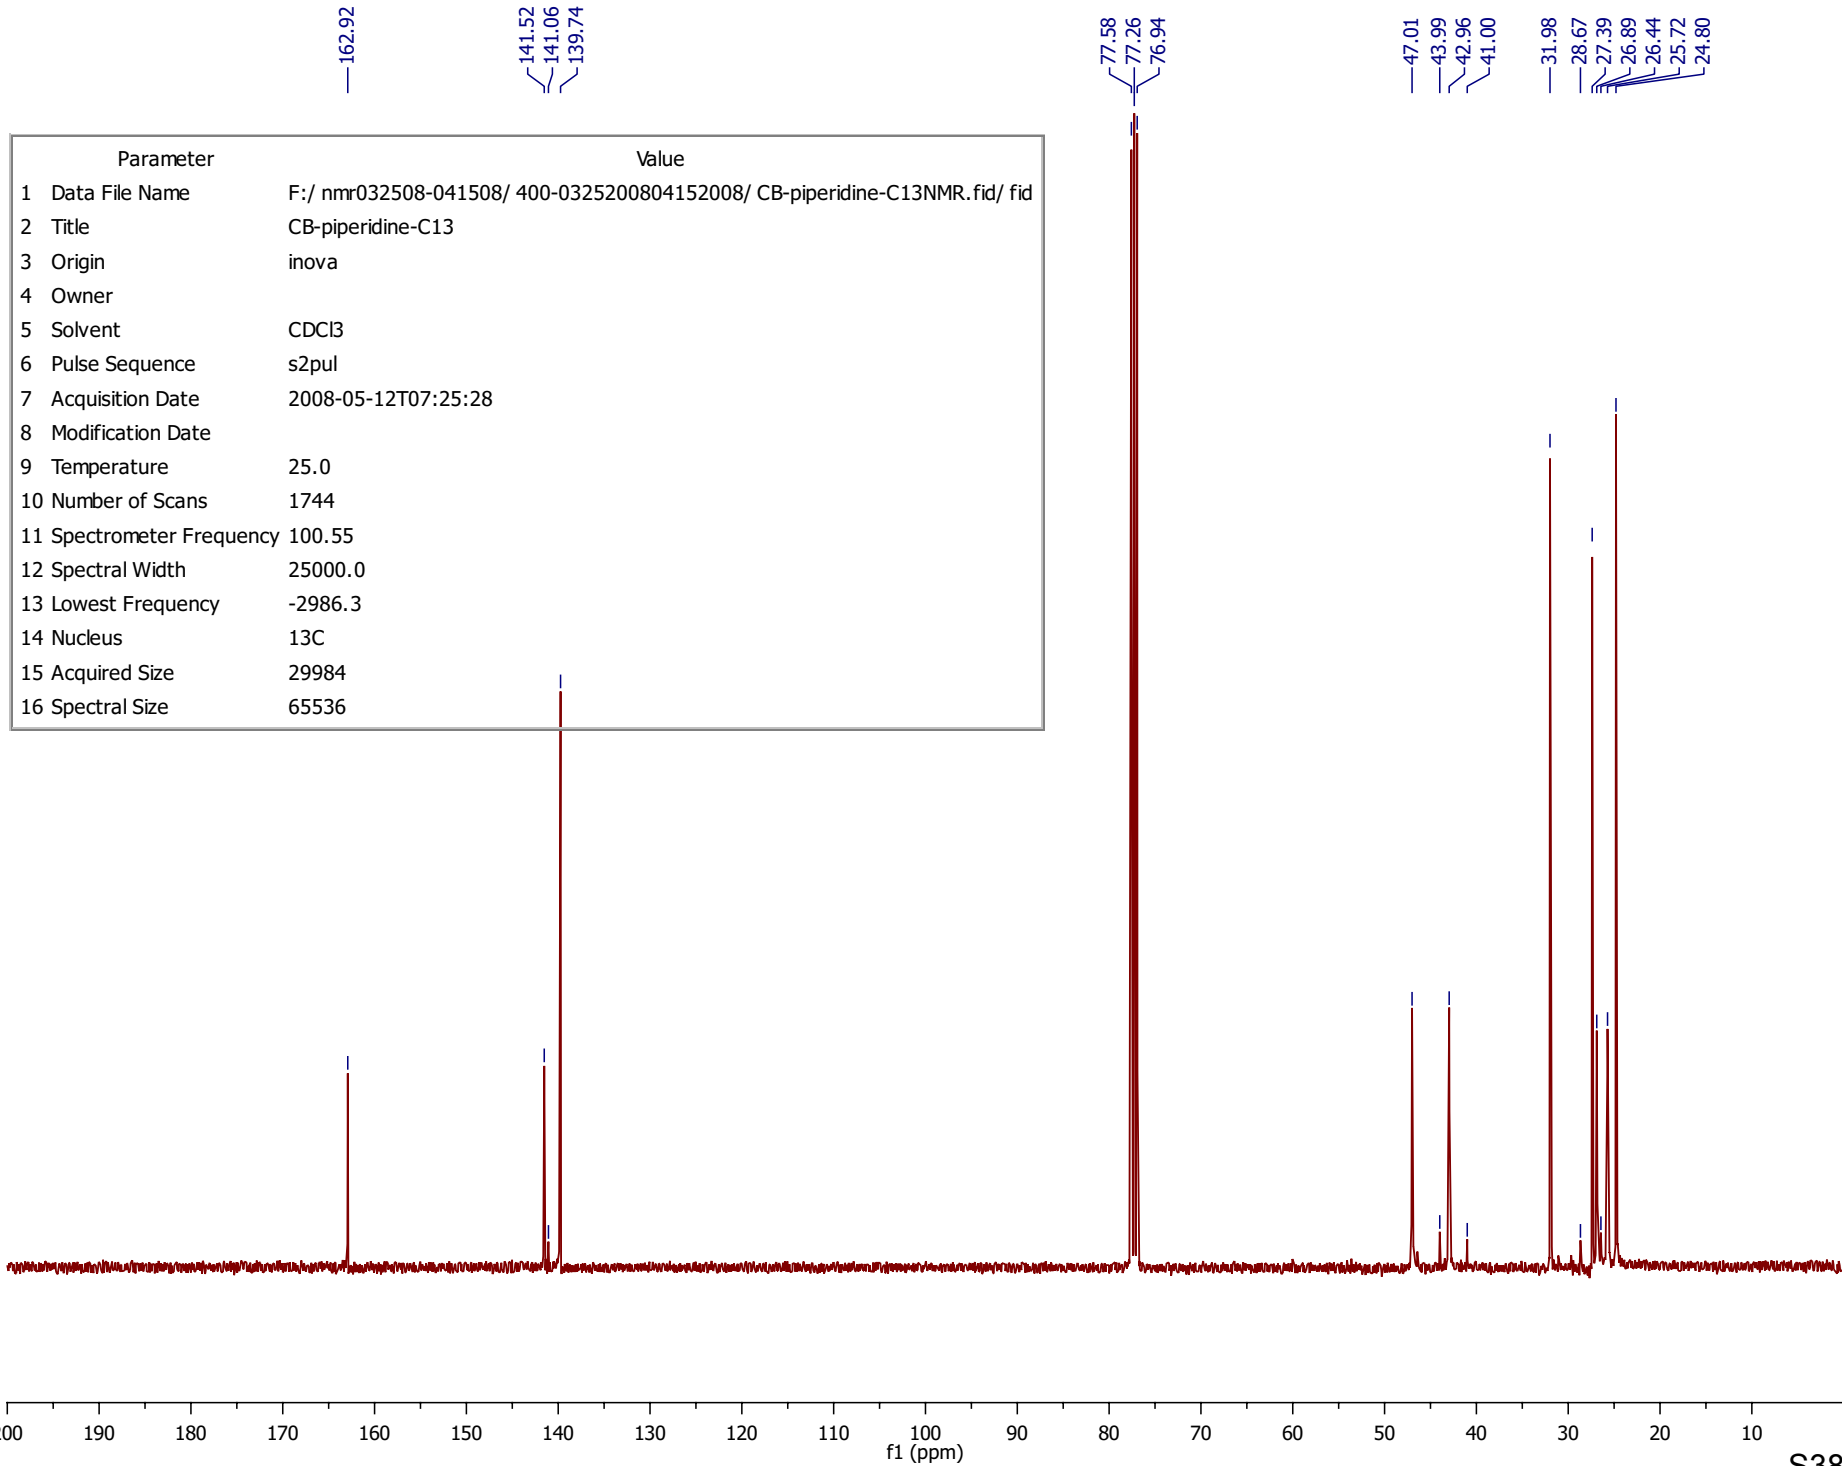

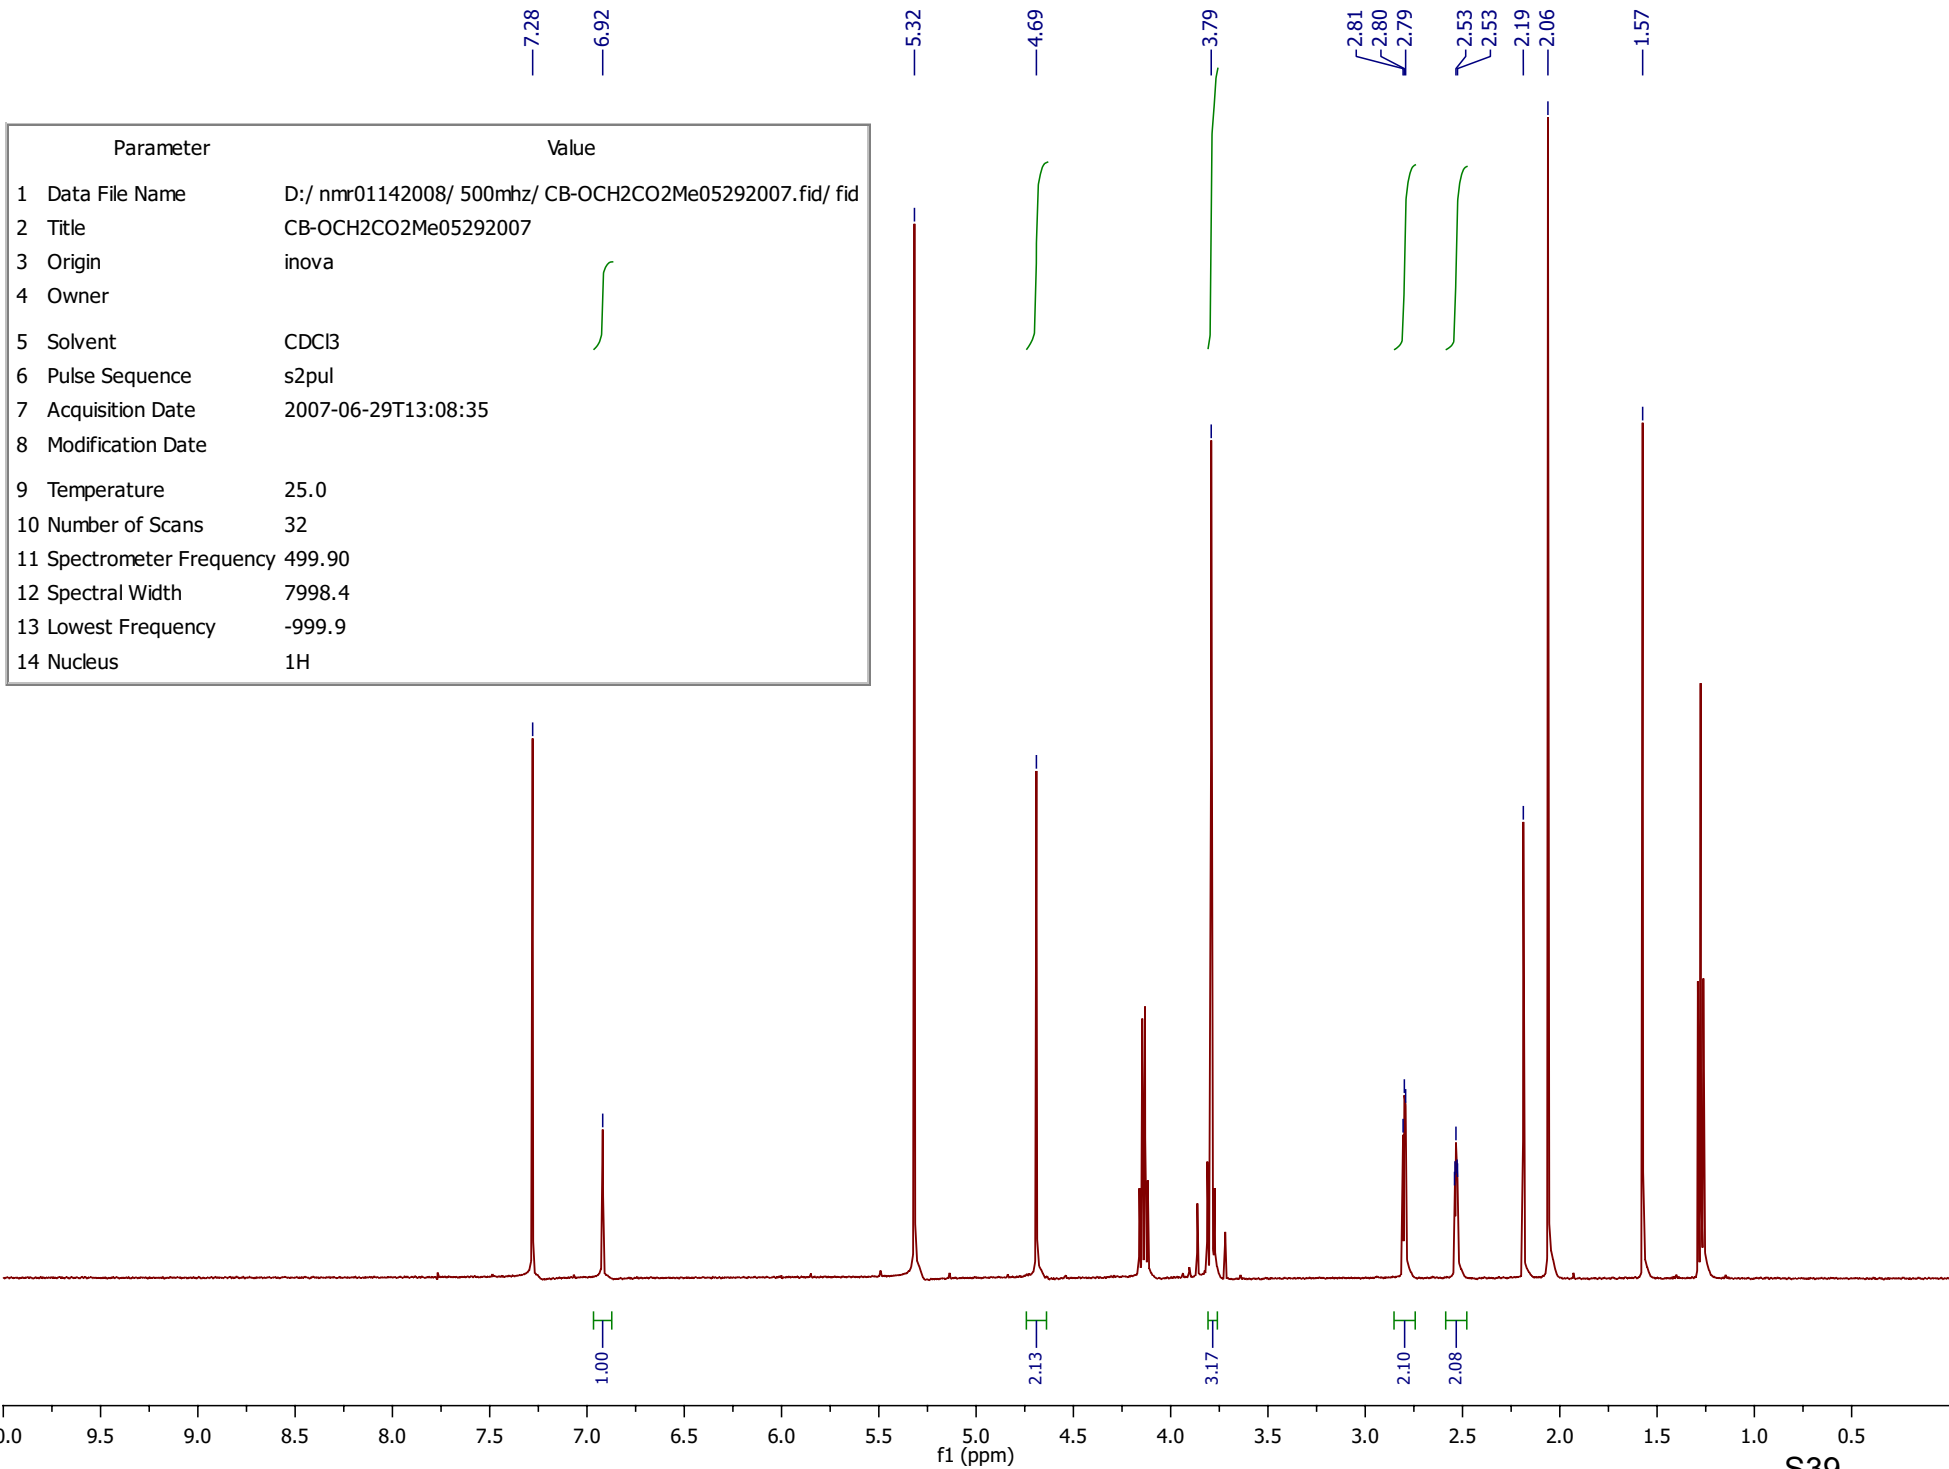

| Parameter                 | Value                                                  |
|---------------------------|--------------------------------------------------------|
| 1 Data File Name          | D:/ nmr01142008/ 500mhz/ CB-OCH2CO2Me05292007.fid/ fid |
| 2 Title                   | CB-OCH2CO2Me05292007                                   |
| 3 Origin                  | inova                                                  |
| 4 Owner                   |                                                        |
| 5 Solvent                 | CDCl3                                                  |
| 6 Pulse Sequence          | s2pul                                                  |
| 7 Acquisition Date        | 2007-06-29T13:08:35                                    |
| 8 Modification Date       |                                                        |
| 9 Temperature             | 25.0                                                   |
| 10 Number of Scans        | 32                                                     |
| 11 Spectrometer Frequency | 499.90                                                 |
| 12 Spectral Width         | 7998.4                                                 |
| 13 Lowest Frequency       | -999.9                                                 |
| 14 Nucleus                | 1H                                                     |

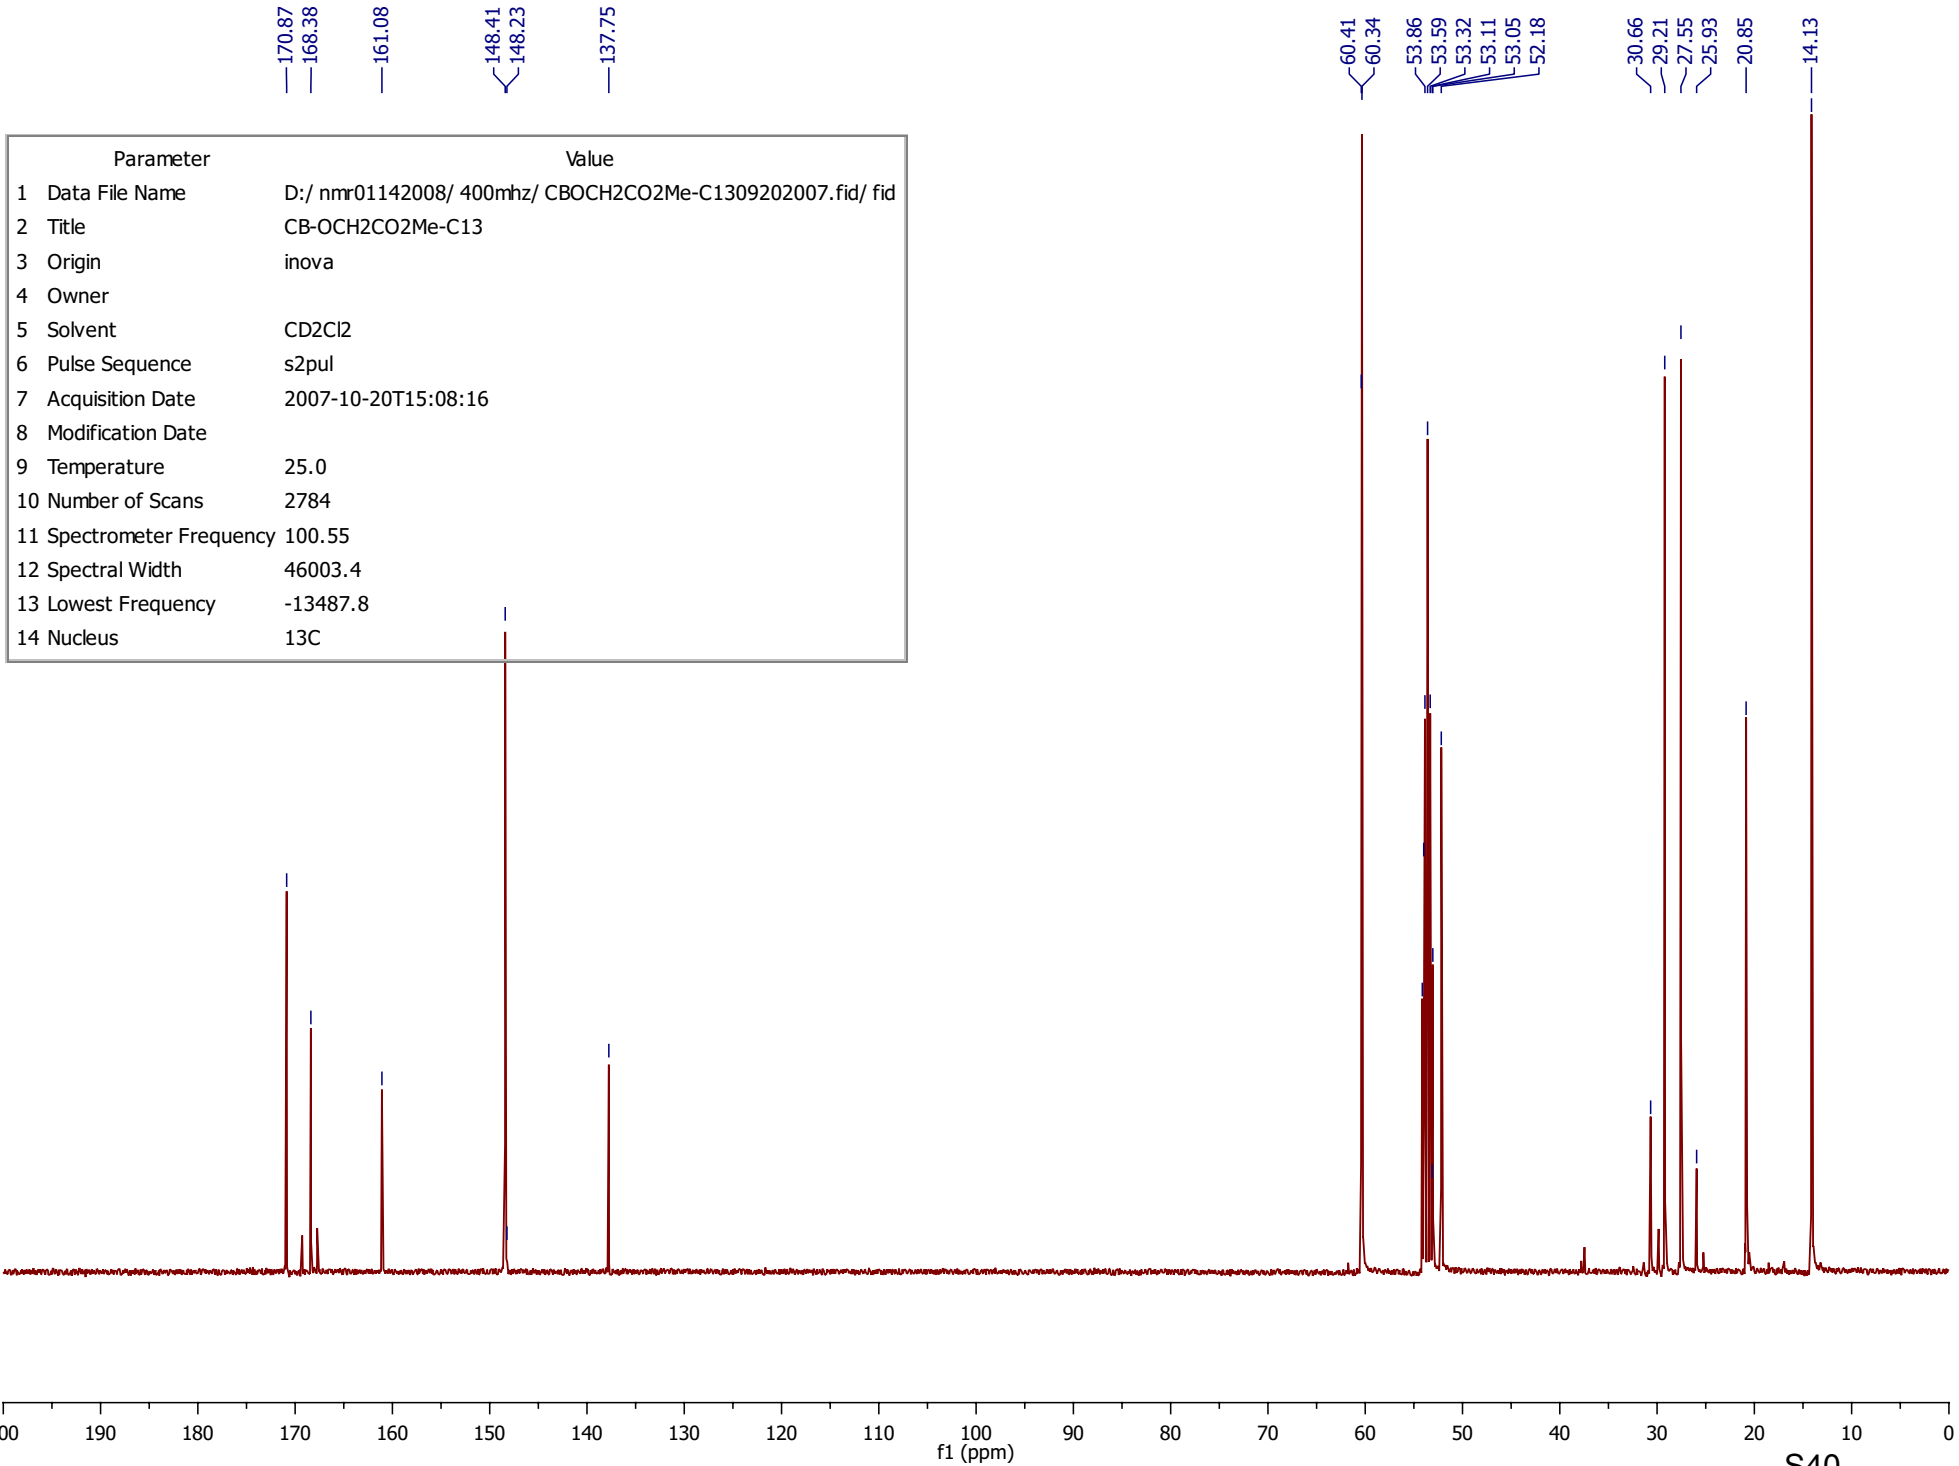



| Parameter                 | Value                                                              |
|---------------------------|--------------------------------------------------------------------|
| 1 Data File Name          | E:/ NMRdata/ 09182009-10132009/ 600/ CBCH2OCOCH3-09302009.fid/ fid |
| 2 Title                   | CBCH2OCOCH3-09302009                                               |
| 3 Origin                  | Varian                                                             |
| 4 Spectrometer            | inova                                                              |
| 5 Solvent                 | CDCl3                                                              |
| 6 Temperature             | 25.0                                                               |
| 7 Pulse Sequence          | s2pul                                                              |
| 8 Number of Scans         | 16                                                                 |
| 9 Receiver Gain           | 16                                                                 |
| 10 Relaxation Delay       | 1.0000                                                             |
| 11 Pulse Width            | 0.0000                                                             |
| 12 Acquisition Time       | 1.8920                                                             |
| 13 Acquisition Date       | 2009-09-30T20:35:05                                                |
| 14 Modification Date      | 2009-09-30T19:37:30                                                |
| 15 Spectrometer Frequency | 599.72                                                             |
| 16 Nucleus                | 1H                                                                 |

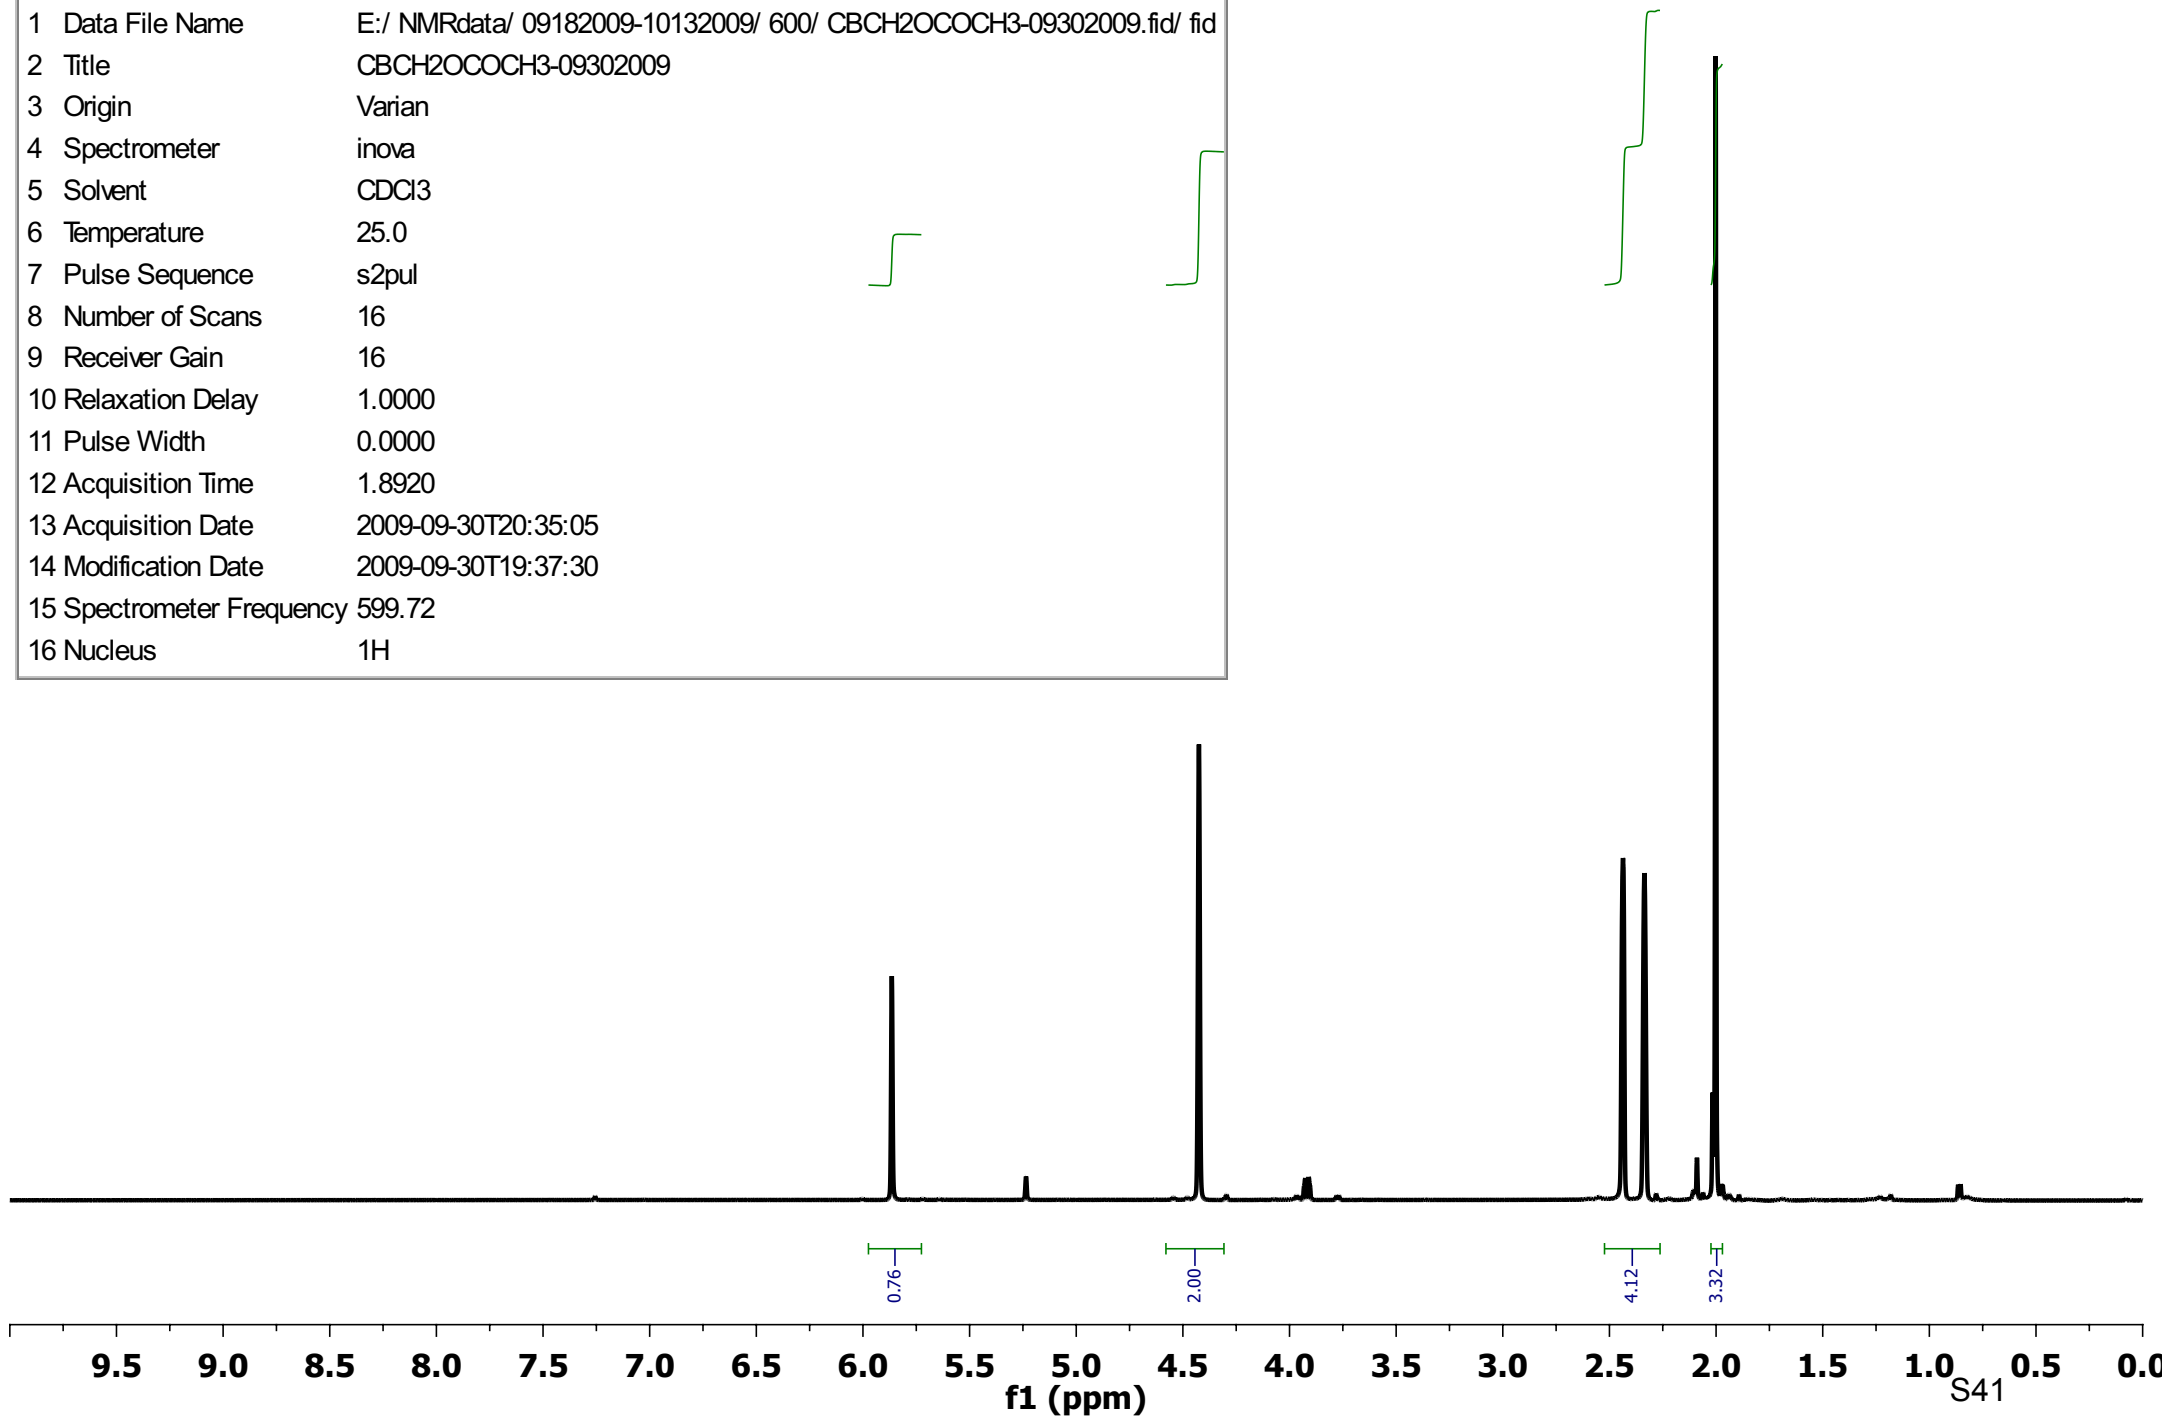

| Parameter                 | Value                                                                    |
|---------------------------|--------------------------------------------------------------------------|
| 1 Data File Name          | E:/ NMRdata/ 09182009-10132009/ 400/ CBCH2OCOCH3-C13NMR09302009.fid/ fid |
| 2 Title                   | CBCH2OCOCH3-C13NMR09302009                                               |
| 3 Origin                  | Varian                                                                   |
| 4 Spectrometer            | inova                                                                    |
| 5 Solvent                 | CDCl3                                                                    |
| 6 Temperature             | 25.0                                                                     |
| 7 Pulse Sequence          | s2pul                                                                    |
| 8 Number of Scans         | 56                                                                       |
| 9 Receiver Gain           | 60                                                                       |
| 10 Relaxation Delay       | 1.0000                                                                   |
| 11 Pulse Width            | 0.0000                                                                   |
| 12 Acquisition Time       | 1.1994                                                                   |
| 13 Acquisition Date       | 2009-09-30T21:41:29                                                      |
| 14 Modification Date      | 2009-09-30T20:44:00                                                      |
| 15 Spectrometer Frequency | 100.55                                                                   |
| 16 Nucleus                | 13C                                                                      |

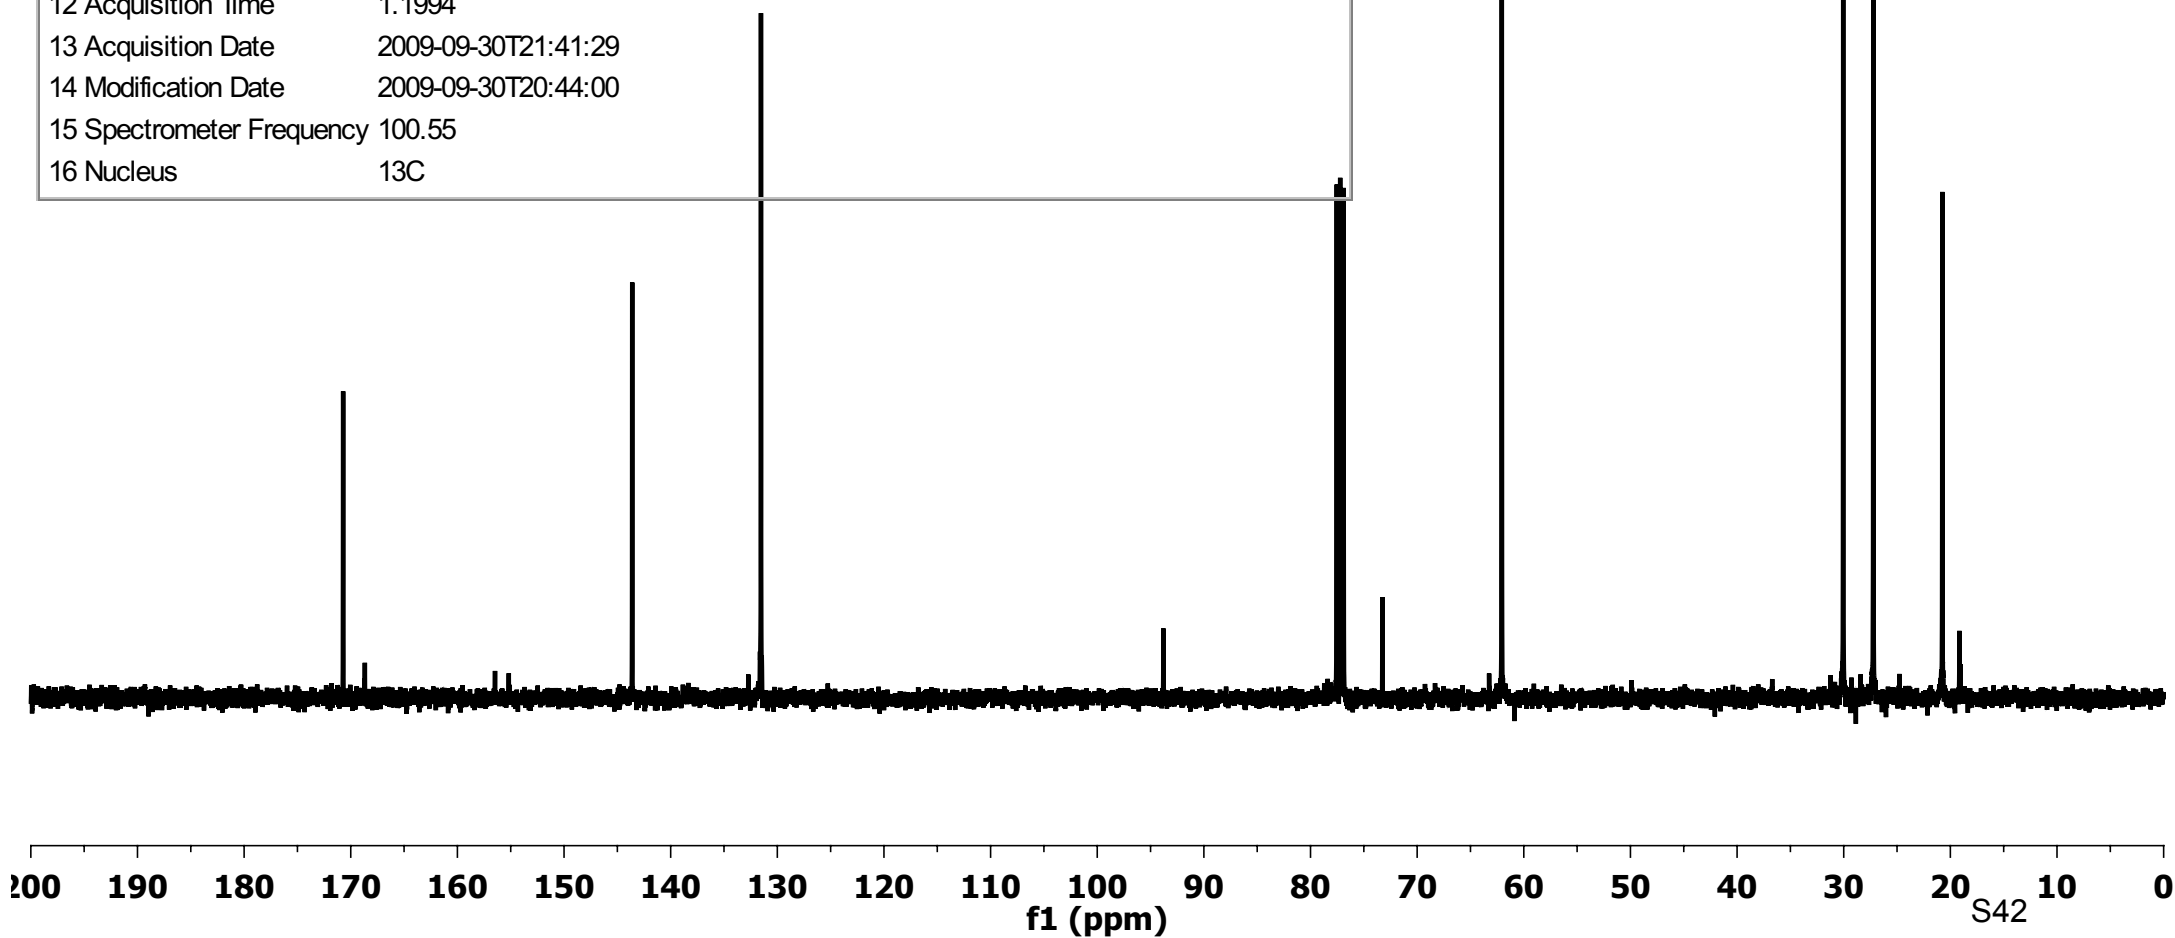

092706-CyBuCH2OH-PivalEster-SEP

Pulse Sequence: s2pul  
Solvent: CDCl3  
Temp: 25.0 C / 298.1 K  
User: 1-12-87  
INDVA-400 "inv400"

Relax. delay 1.000 sec  
Pulse 30.0 degrees  
Acq. time 3.273 sec  
Width 6000.6 Hz  
200 repetitions  
OBSERVE H1, 399.8379347 MHz  
DATA PROCESSING  
FT size 131072  
Total time 14 min, 16 sec

### 1H-NMR

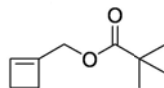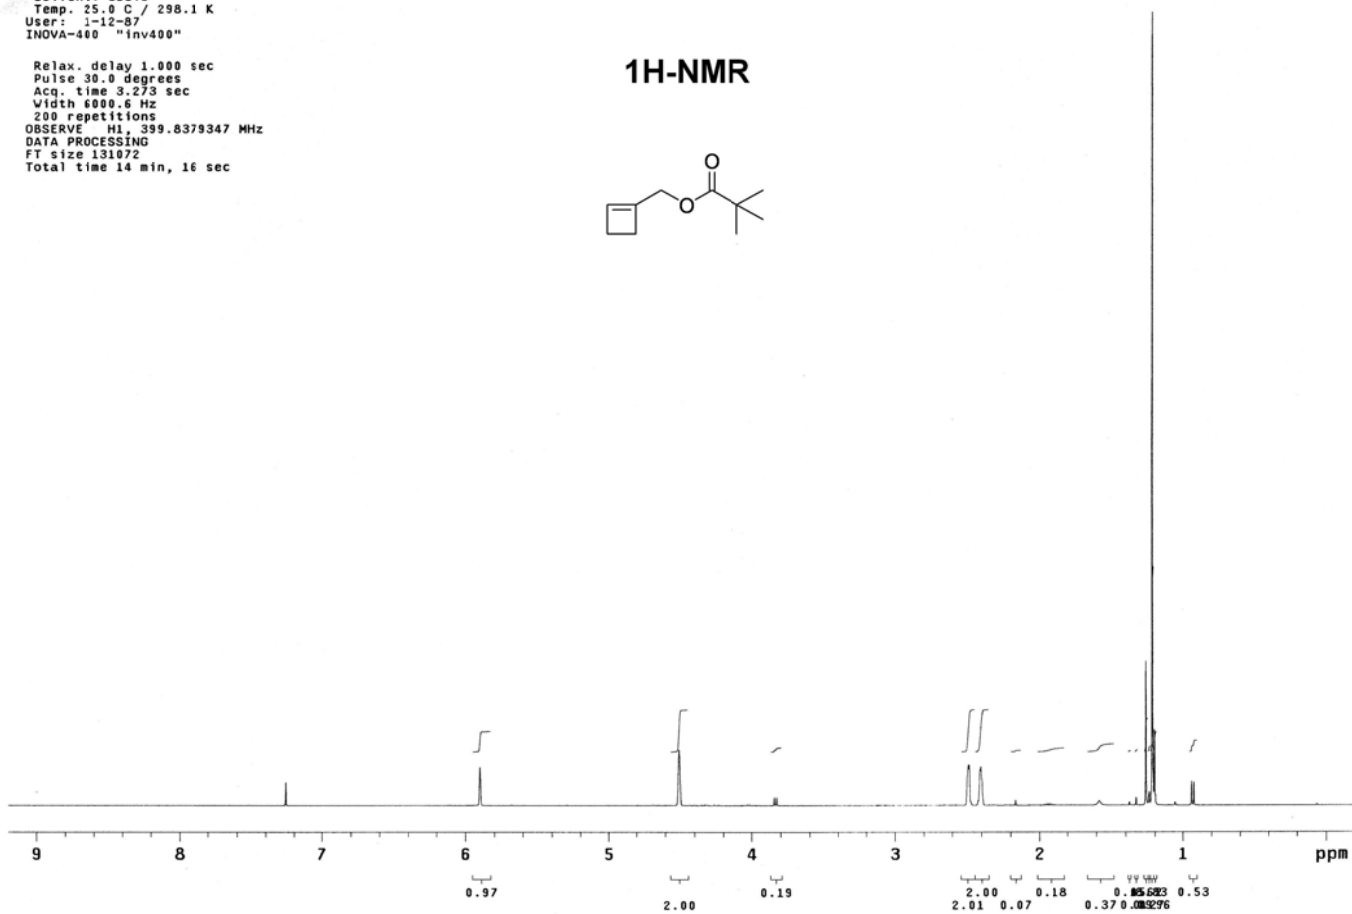

092706-CyBuCH2OH-PivalEster-C13

Pulse Sequence: s2pu1

Solvent: CDCl3  
Temp.: 25.0 C / 298.1 K  
INOVA-400 "Inv400"

Relax. delay 1.000 sec  
Pulse 82.1 degrees  
Acq. time 1.199 sec  
Width 25000.0 Hz  
18500 repetitions  
OBSERVE C13, 100.5393046 MHz  
DECOUPLE H1, 399.8399342 MHz  
Power 47 dB  
continuously on  
WALTZ-16 modulated  
DATA PROCESSING  
Line broadening 1.0 Hz  
FT size 65536  
Total time 11 hr, 20 min, 51 sec

13C-NMR

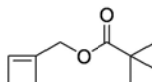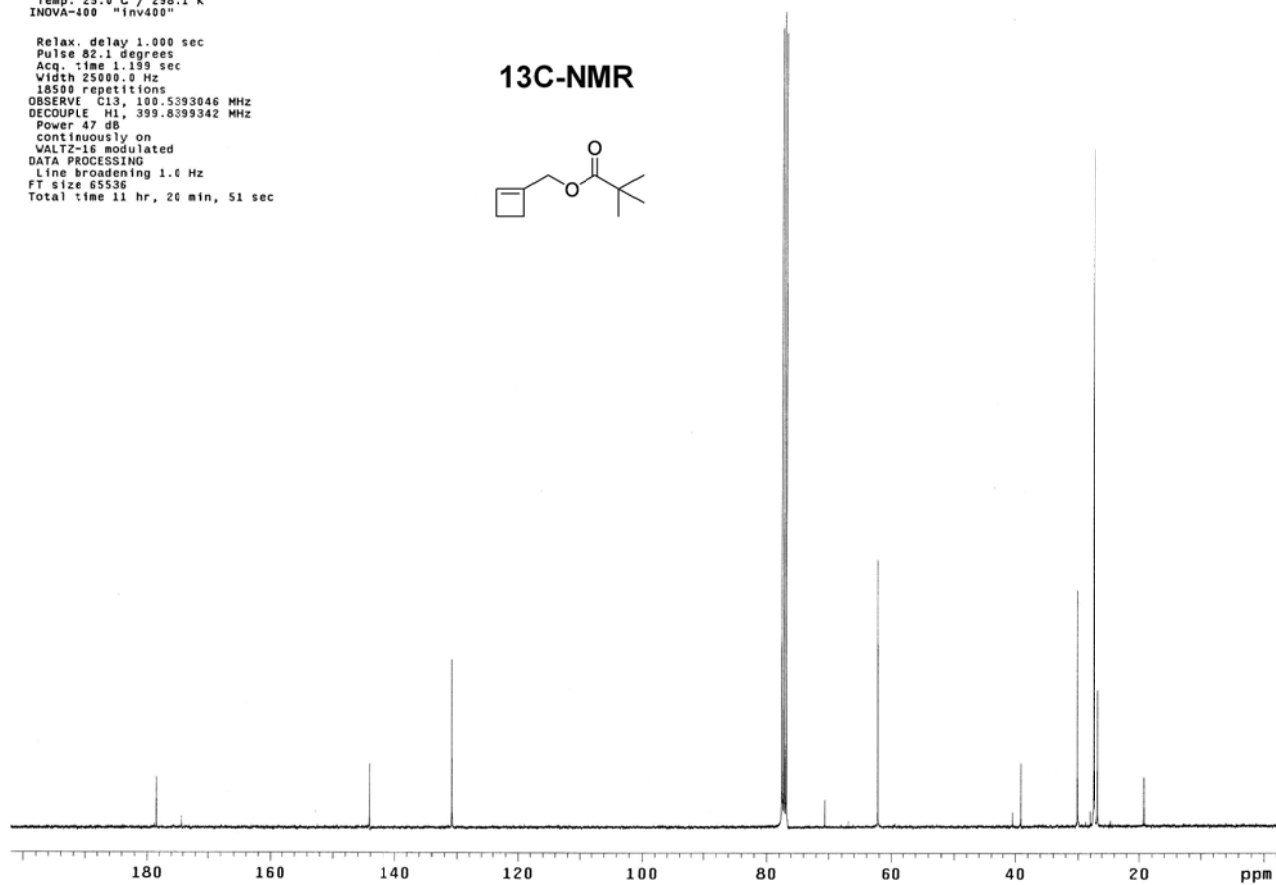

060806-CyBuMeOH-Sep-B  
Pulse Sequence: s2pul  
Solvent: CDCl3  
Temp: 25.0 C / 298.1 K  
User: 1-12-87  
File: 060806-CyBuMeOH-Sep-B  
INOVA-400 "inv400"

Relax. delay 1.000 sec  
Pulse 30.0 degrees  
Acq. time 3.273 sec  
Width 6000.6 Hz  
200 repetitions  
OBSERVE H1, 399.8379288 MHz  
DATA PROCESSING  
FT size 131972  
Total time 14 min, 16 sec

# 1H-NMR

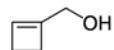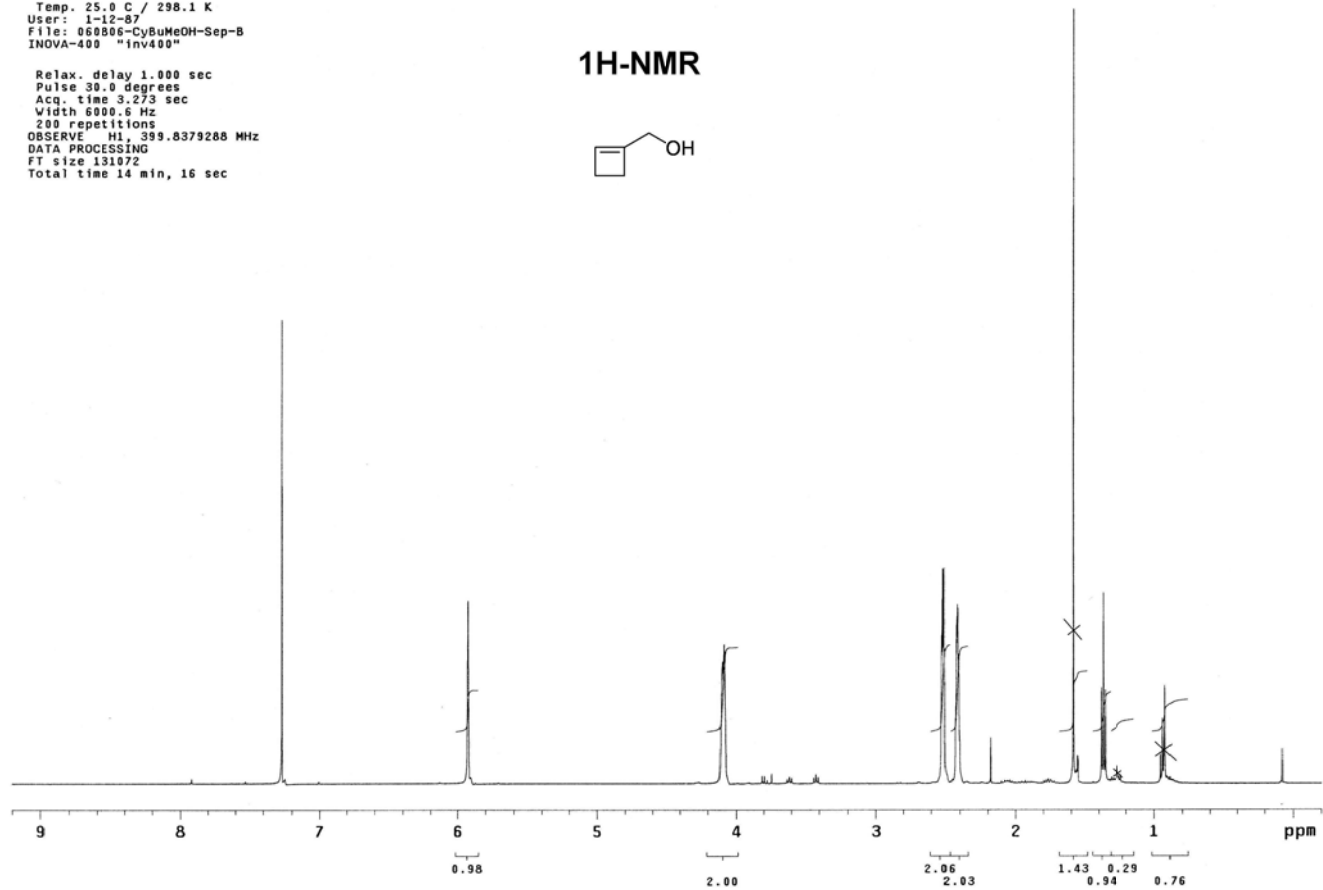

092606-CyButeneCH2OH-C13

Pulse Sequence: s2pu1

Solvent: CDCl3  
Temp. 25.0 C / 298.1 K  
INNOVA-400 "inv400"

Relax. delay 1.000 sec  
Pulse 82.1 degrees  
Acq. time 1.199 sec  
Width 25000.0 Hz  
17600 repetitions  
OBSERVE C13, 100.5393046 MHz  
DECOUPLE H1, 399.8399342 MHz  
Power 47 dB  
continuously on  
WALTZ-16 modulated  
DATA PROCESSING  
Line broadening 1.0 Hz  
FT size 65536  
Total time 10 hr, 47 min, 44 sec

13C-NMR

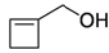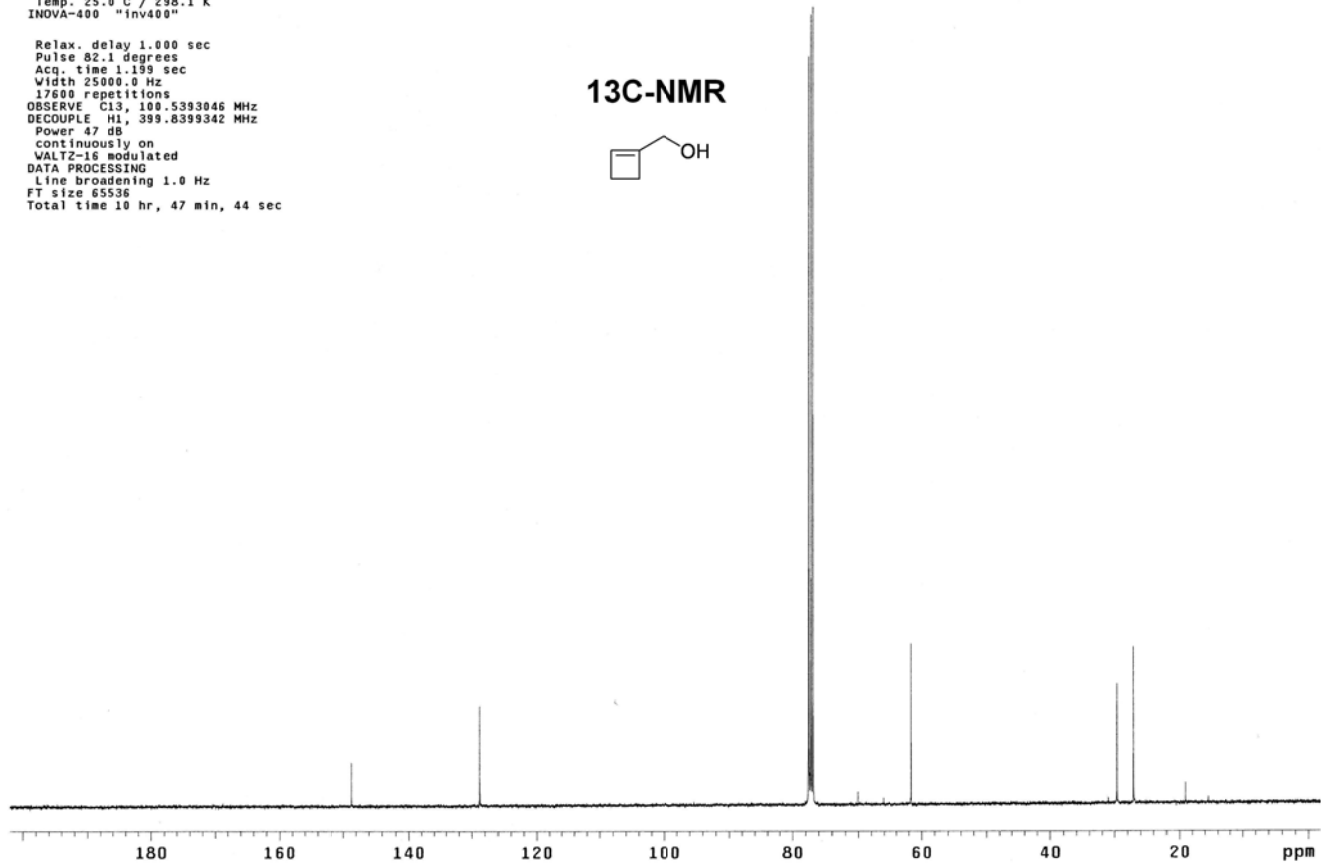

| Parameter                 | Value                                                  |
|---------------------------|--------------------------------------------------------|
| 1 Data File Name          | G:/ 10142009-12122009/ CBCH2OAc-10mer12122009.fid/ fid |
| 2 Title                   | CBCH2OAc-10mer12122009                                 |
| 3 Comment                 | CBCH2OAc-10mer12122009                                 |
| 4 Origin                  | Varian                                                 |
| 5 Owner                   |                                                        |
| 6 Site                    |                                                        |
| 7 Spectrometer            | inova                                                  |
| 8 Author                  |                                                        |
| 9 Solvent                 | CD2Cl2                                                 |
| 10 Temperature            | 25.0                                                   |
| 11 Pulse Sequence         | s2pul                                                  |
| 12 Number of Scans        | 48                                                     |
| 13 Receiver Gain          | 44                                                     |
| 14 Relaxation Delay       | 1.0000                                                 |
| 15 Pulse Width            | 0.0000                                                 |
| 16 Acquisition Time       | 1.8920                                                 |
| 17 Acquisition Date       | 2009-12-12T11:57:18                                    |
| 18 Modification Date      | 2009-12-12T12:01:28                                    |
| 19 Spectrometer Frequency | 599.72                                                 |
| 20 Spectral Width         | 8000.0                                                 |
| 21 Lowest Frequency       | -1001.2                                                |
| 22 Nucleus                | 1H                                                     |
| 23 Acquired Size          | 15136                                                  |
| 24 Spectral Size          | 32768                                                  |

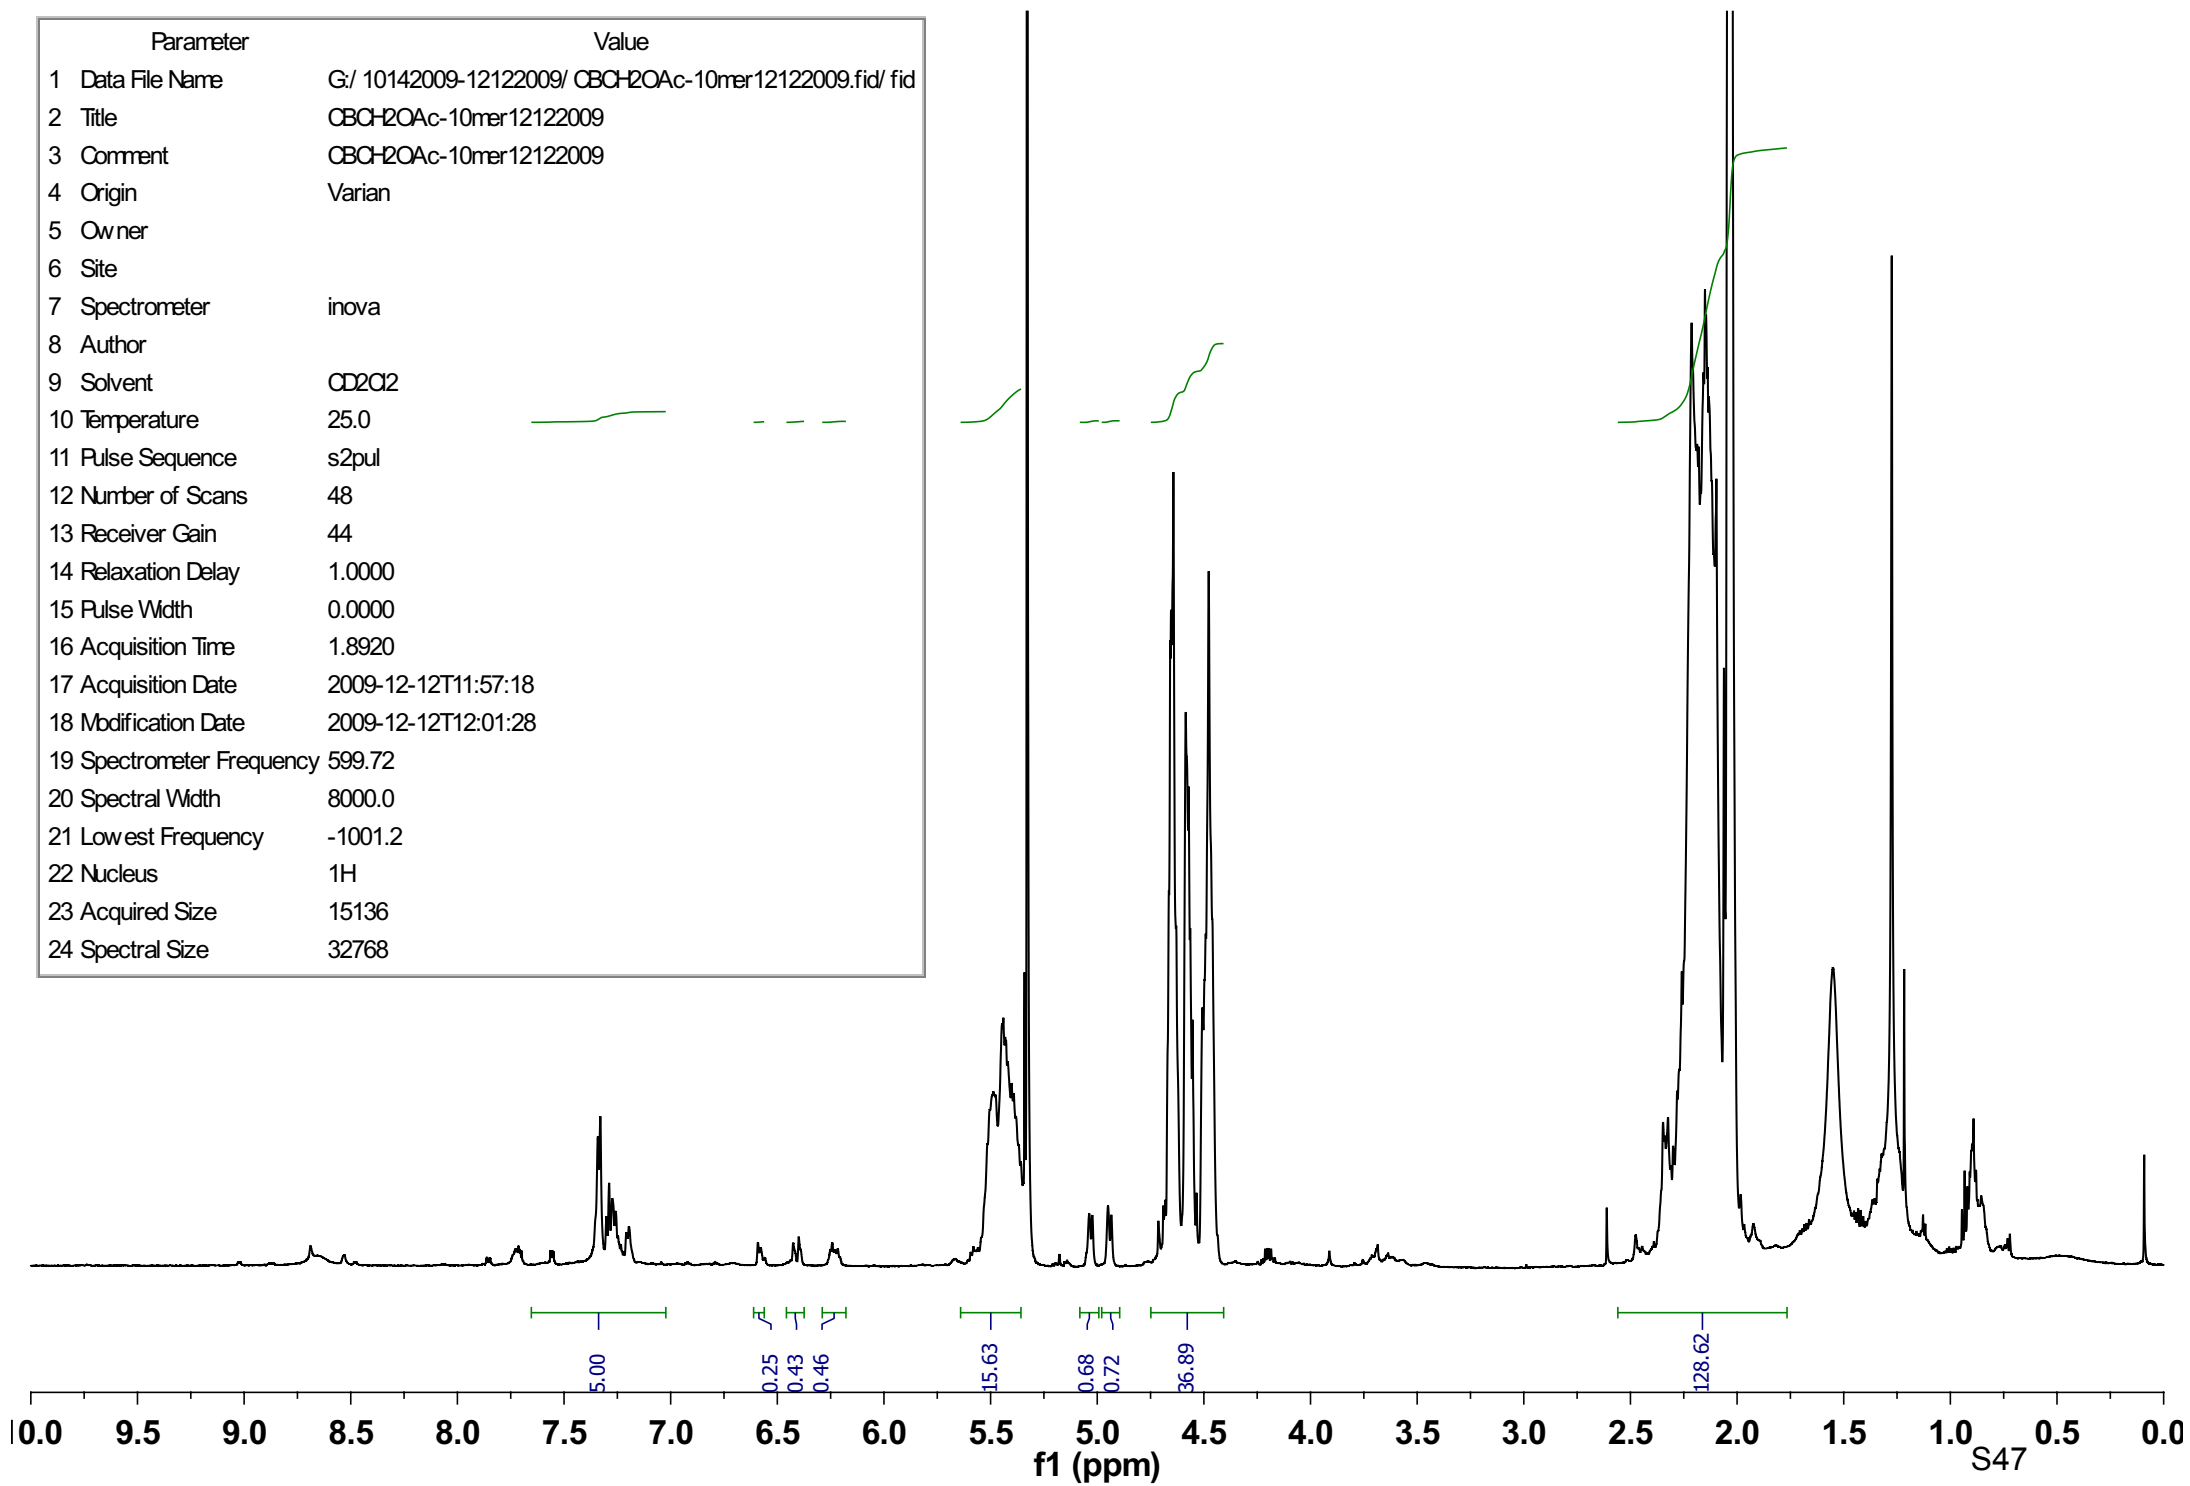

103106-ROMP-CyBuMe-PivalEster-PURI-COMB

Data Collected on:  
inv500-inova500  
Archive directory:  
/export/home/jclee/vnmrsys/data  
Sample directory:

File: PROTON

Pulse Sequence: s2pu1  
Solvent: CD2Cl2  
Temp. 25.0 C / 298.1 K

Relax. delay 1.000 sec  
Pulse 45.0 degrees  
Acq. time 1.892 sec  
Width 7998.4 Hz  
200 repetitions  
OBSERVE H1, 499.8954577 MHz  
DATA PROCESSING  
FT size 32768  
Total time 9 min

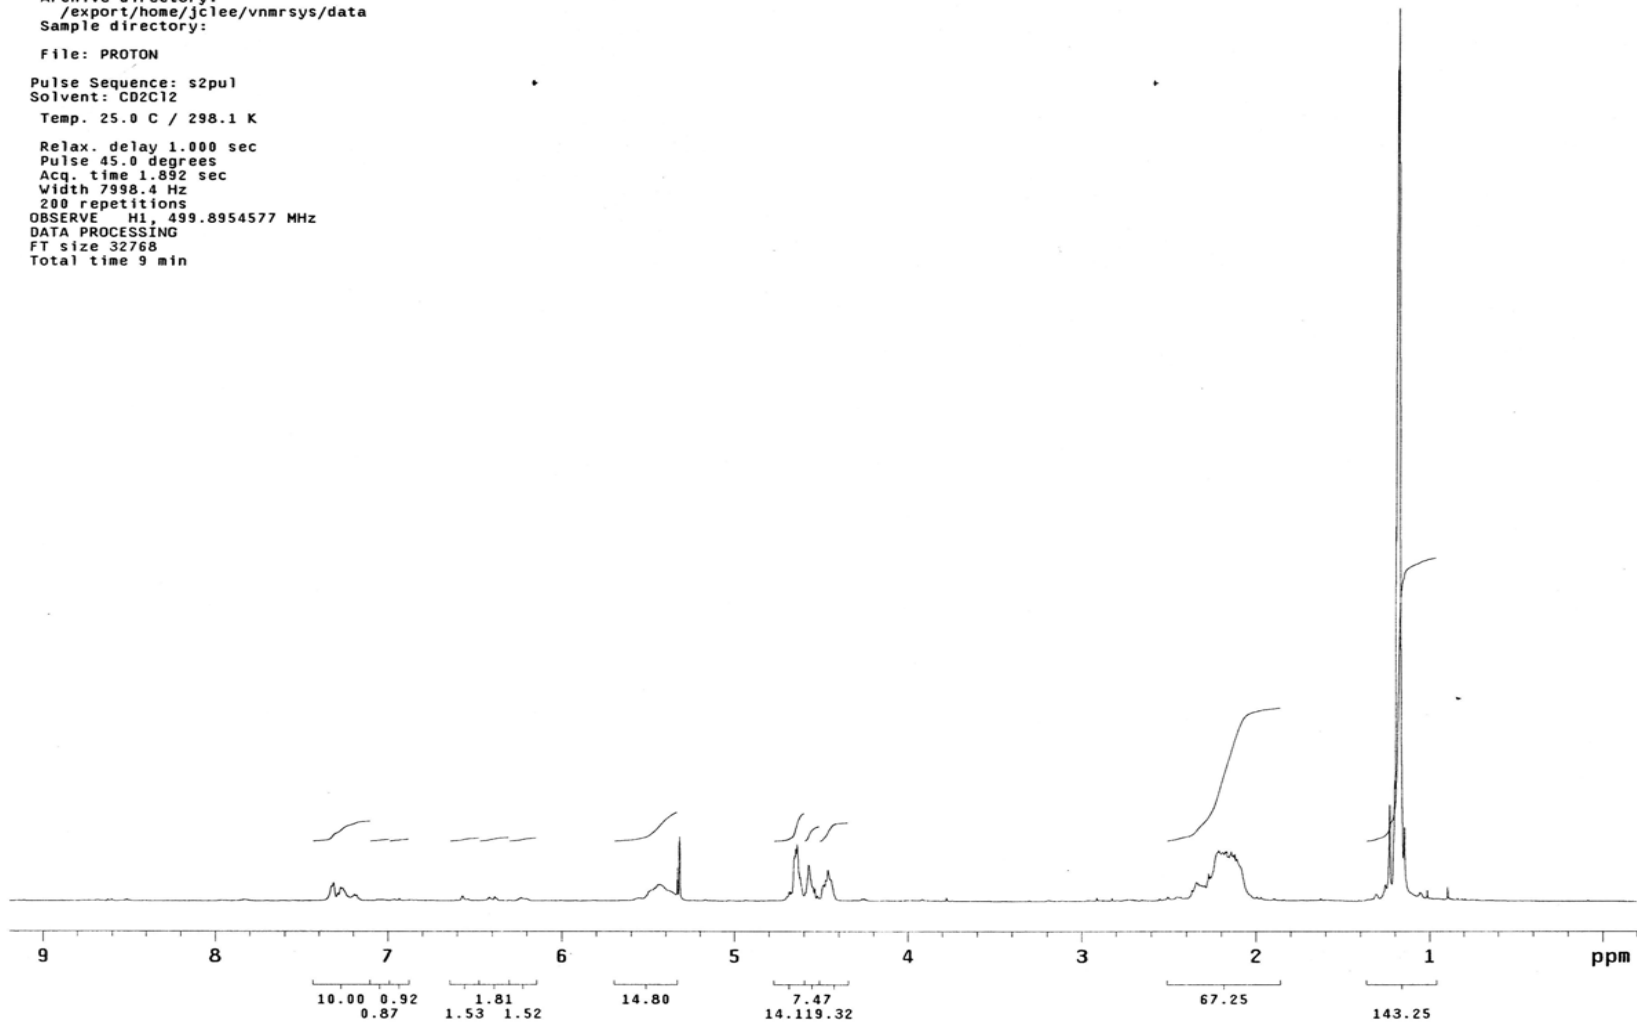



103106-ROMP-CyBuMePivalEster-PURI-Comb-C13  
 Pulse Sequence: s2pu1  
 Solvent: CD2Cl2  
 Temp. 25.0 C / 298.1 K  
 INOVA-400 "inv400"

Relax. delay 1.000 sec  
 Pulse 82.1 degrees  
 Acq. time 1.199 sec  
 Width 25800.0 Hz  
 20500 repetitions  
 OBSERVE C13, 100.5394664 MHz  
 DECOUPLE H1, 399.8407019 MHz  
 Power 47 dB  
 continuously on  
 WALTZ-16 modulated  
 DATA PROCESSING  
 Line broadening 1.0 Hz  
 FT size 65536  
 Total time 12 hr, 34 min, 28 sec

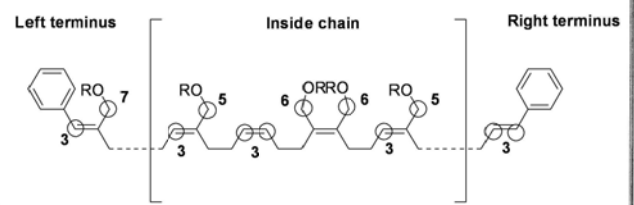

- 1: Carbonyl carbon
- 2: Quaternary carbons
- 4: Phenyl carbons
- 8: Quaternary carbon in trimethyl carbonyl group
- 9: Backbone methylene carbons
- 10: Trimethyl carbons

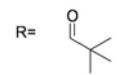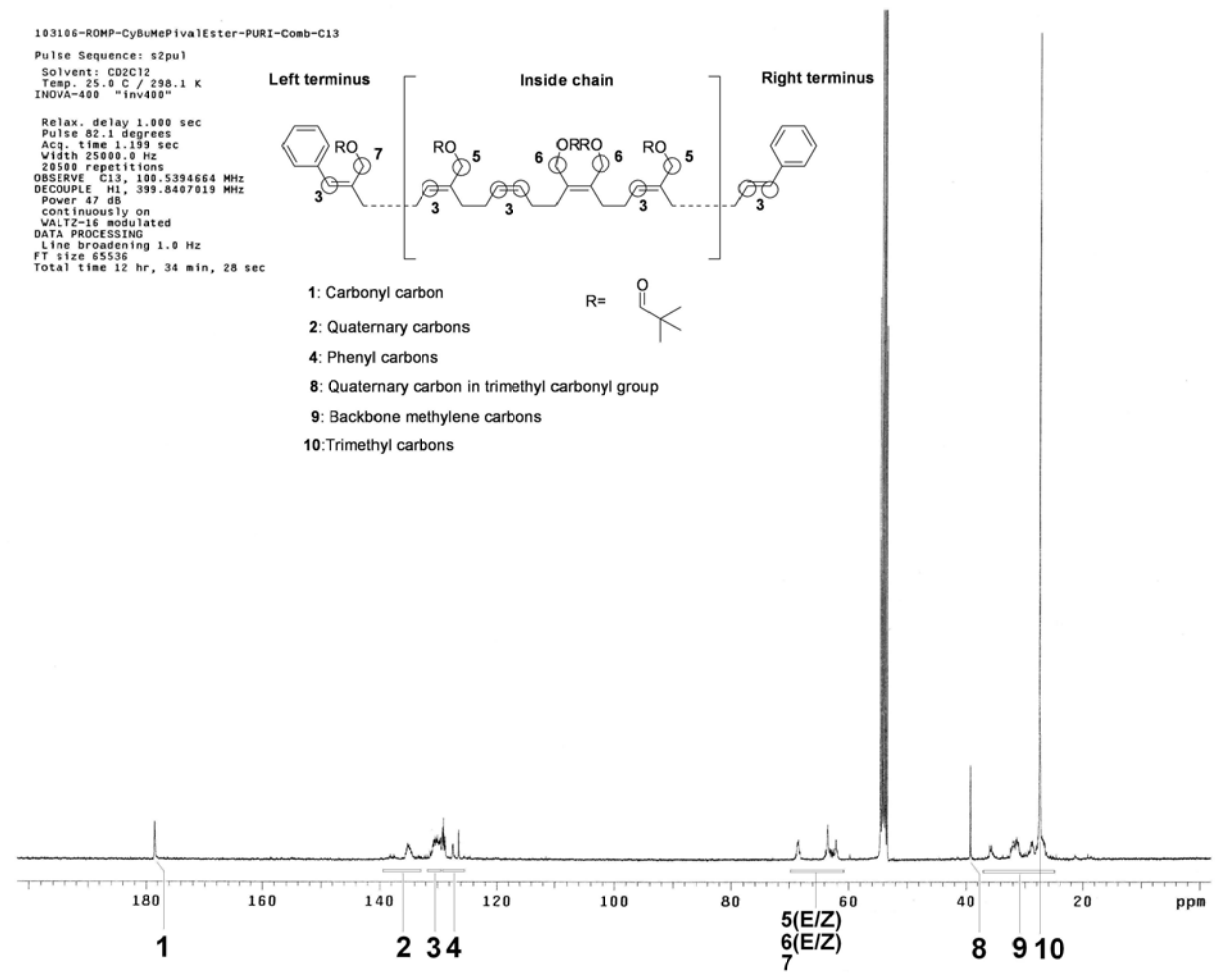

103106--ROMP-CyBuMe-PivalEster-Puri-Comb-APT

Pulse Sequence: apt

Solvent: cdcl3  
Temp. 25.0 C / 298.1 K  
INOVA-400 "inv400"

Relax. delay 1.000 sec  
1st pulse 180.0 degrees  
2nd pulse 82.1 degrees  
Acq. time 1.199 sec  
Width 25000.0 Hz  
20000 repetitions  
OBSERVE C13, 100.5394671 MHz  
DECOUPLE H1, 399.8399342 MHz  
Power 47 dB  
on during acquisition  
WALTZ-16 modulated  
DATA PROCESSING  
Line broadening 1.0 Hz  
FT size 65536  
Total time 12 hr, 21 min, 59 sec

### <sup>13</sup>C-APT Spectrum of the 10-mer Rxn product

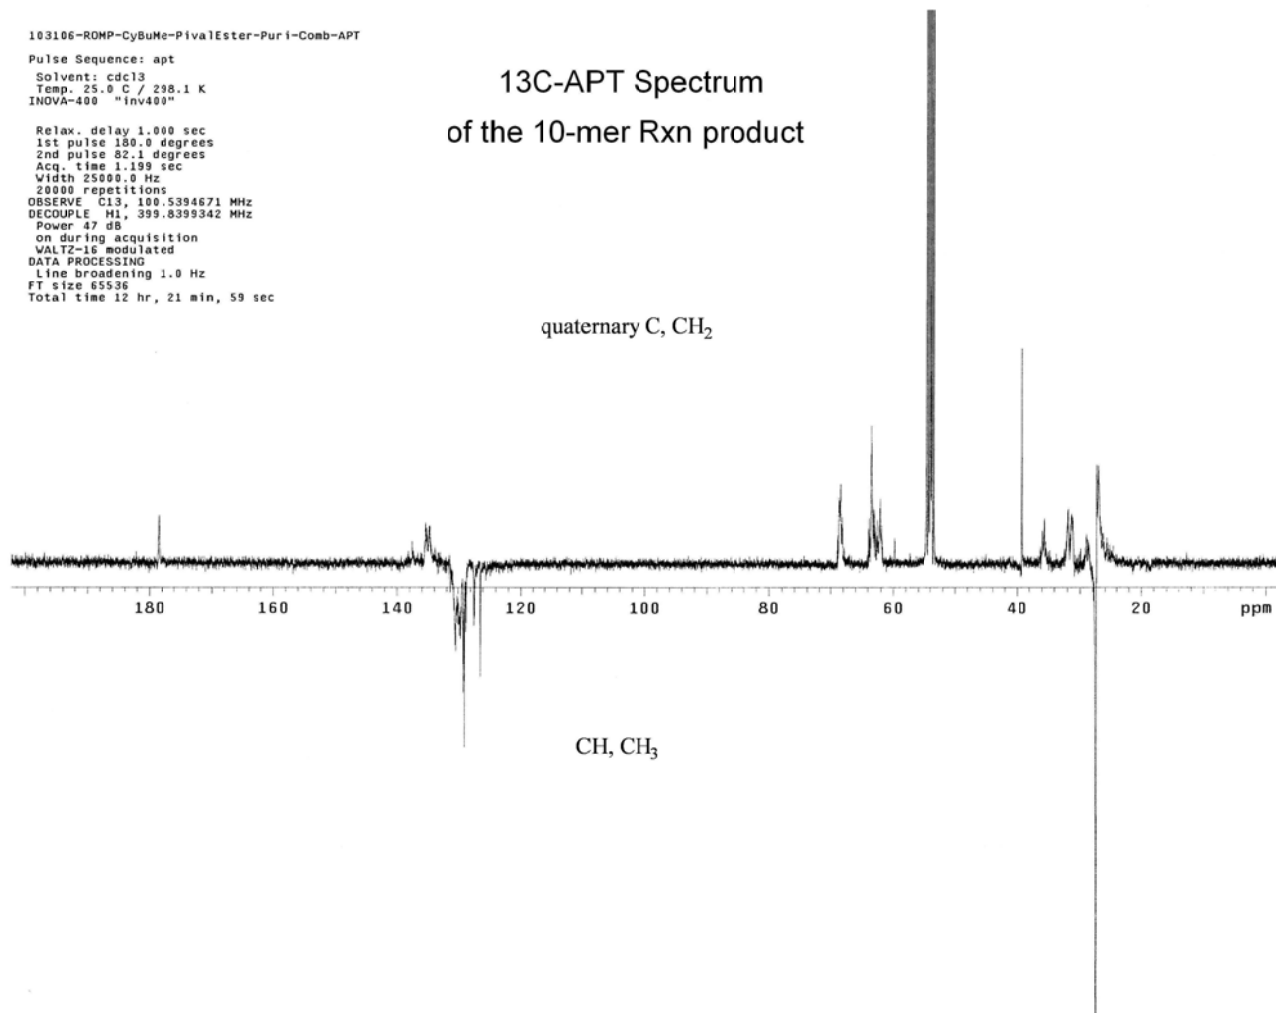

Data Collected on:  
 Inv500-inova500  
 Archive directory:  
 /export/home/jclee/vnmrsys/data  
 Sample directory:  
 jlee\_2006-10-31-165112  
 File: COSY\_01

Pulse Sequence: COSY  
 Solvent: CD2Cl2  
 Temp. 25.0 C / 298.1 K

Relax. delay 1.000 sec  
 Acq. time 0.150 sec  
 Width 5998.8 Hz  
 2D Width 5998.8 Hz  
 8 repetitions  
 128 increments  
 OBSERVE H1, 499.8954420 MHz  
 DATA PROCESSING  
 Sq. sine bell 0.075 sec  
 F1 DATA PROCESSING  
 Sq. sine bell 0.021 sec  
 FT size 2048 x 2048  
 Total time 20 min

gCOSY Spectrum  
 of the 10-mer Rxn product

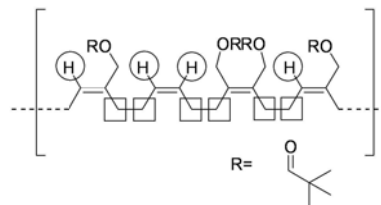

- a: ○ : Vinyl protons in the backbone  
 b: □ : Methylene protons in the backbone

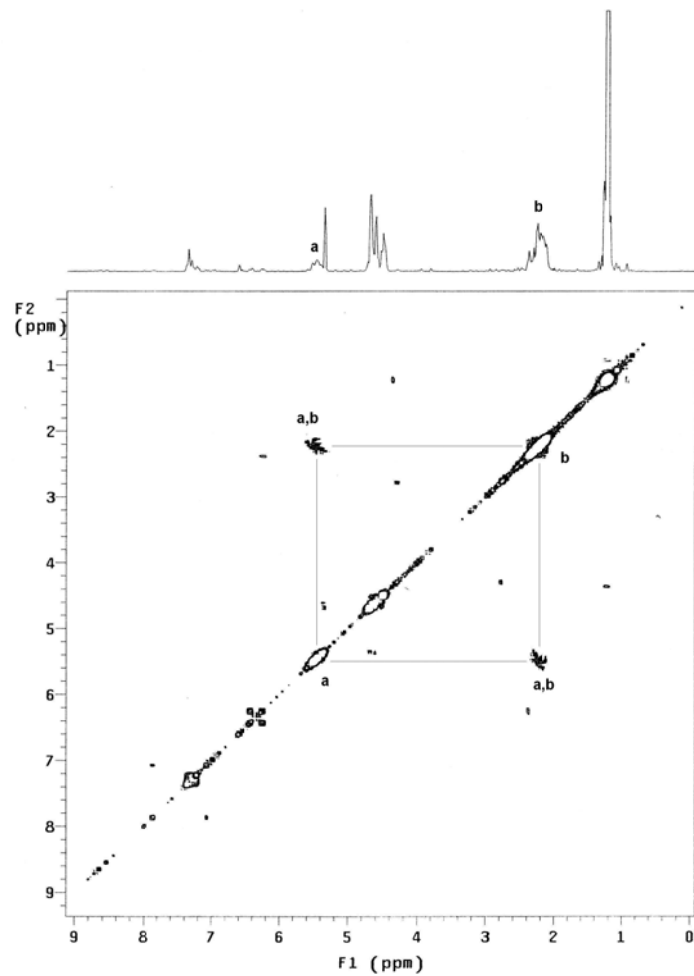

Archive directory: /export/home/jclee/vnmrsys/data  
Sample directory: jclee\_92Nov2006

Pulse Sequence: gHMOC

Solvent: CD2Cl2

Temp: 25.0 C / 298.1 K

User: 1-12-07

File: 103106-RQHP-CyBuMe-PivalEster-Purif-Com-gHMOC  
INNOVA-400 "inv400"

Relax. delay 1.000 sec  
Acq. time 0.213 sec  
Width 4798.2 Hz  
2D Width 20105.6 Hz  
138 repetitions  
2 x 128 increments  
OBSERVE H1, 399.8387024 MHz  
DECOUPLE C13, 100.5485462 MHz  
Power 31 dB  
on during acquisition  
off during delay  
W40\_asw5133 modulated  
DATA PROCESSING  
Gauss apodization 0.099 sec  
F1 DATA PROCESSING  
Gauss apodization 0.012 sec  
FT size 2048 x 2048  
Total time 12 hr, 27 min, 7 sec

gHMOC Spectrum  
of the 10-mer Rxn product

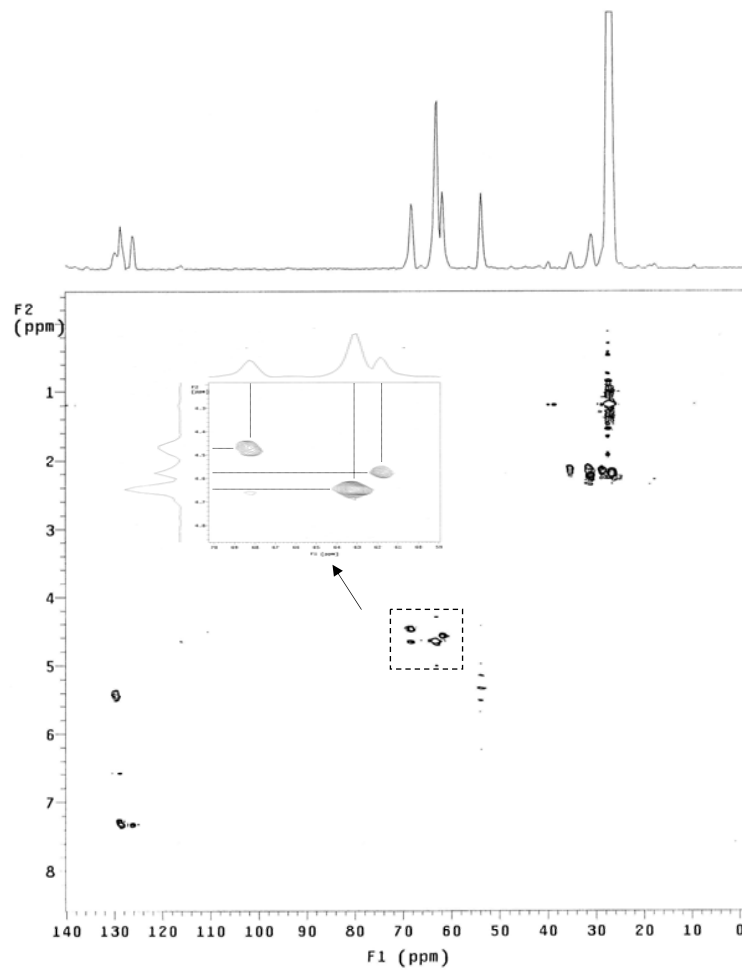

| Parameter                 | Value                                                    |
|---------------------------|----------------------------------------------------------|
| 1 Data File Name          | G:/ 10142009-12122009/ CBAIaOMe-10mer12122009-2.fid/ fid |
| 2 Title                   | CBAIaOMe-10mer12122009-2                                 |
| 3 Comment                 | CBAIaOMe-10mer                                           |
| 4 Origin                  | Varian                                                   |
| 5 Owner                   |                                                          |
| 6 Site                    |                                                          |
| 7 Spectrometer            | inova                                                    |
| 8 Author                  |                                                          |
| 9 Solvent                 | CD2Cl2                                                   |
| 10 Temperature            | 25.0                                                     |
| 11 Pulse Sequence         | s2pul                                                    |
| 12 Number of Scans        | 64                                                       |
| 13 Receiver Gain          | 40                                                       |
| 14 Relaxation Delay       | 1.0000                                                   |
| 15 Pulse Width            | 0.0000                                                   |
| 16 Acquisition Time       | 1.8920                                                   |
| 17 Acquisition Date       | 2009-12-12T12:46:50                                      |
| 18 Modification Date      | 2009-12-12T12:50:34                                      |
| 19 Spectrometer Frequency | 599.72                                                   |
| 20 Spectral Width         | 8000.0                                                   |
| 21 Lowest Frequency       | -1001.2                                                  |
| 22 Nucleus                | 1H                                                       |
| 23 Acquired Size          | 15136                                                    |
| 24 Spectral Size          | 32768                                                    |

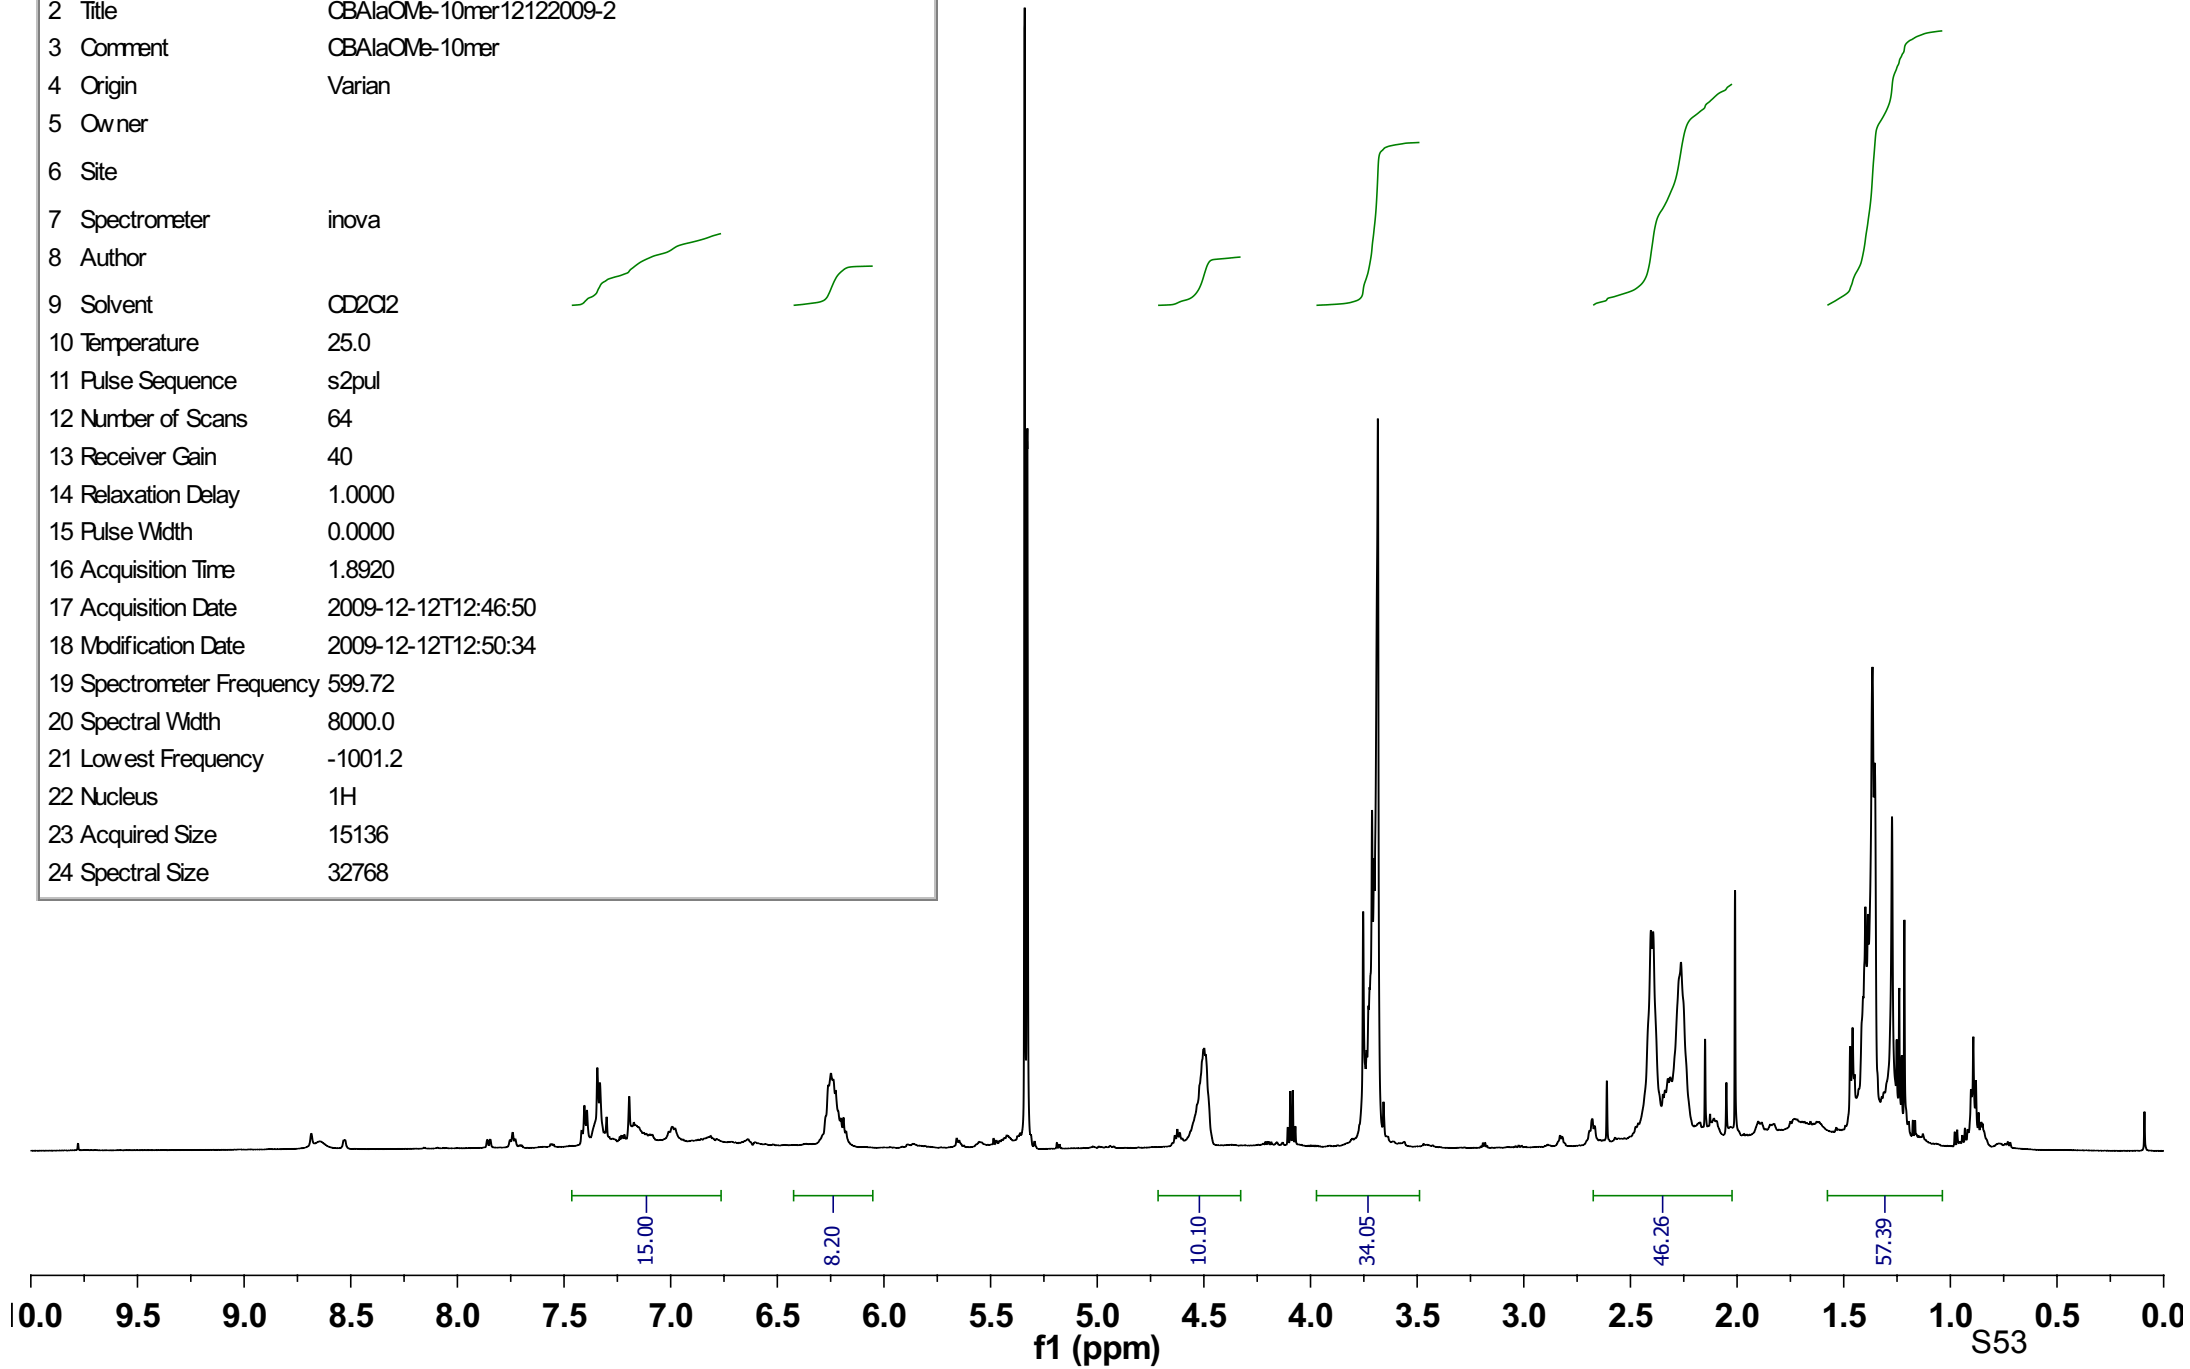

| Parameter                 | Value                                                         |
|---------------------------|---------------------------------------------------------------|
| 1 Data File Name          | G:/ 10142009-12122009/ CBCONHC2H4OMe-10mer-121122009.fid/ fid |
| 2 Title                   | CBCONHC2H4OMe-10mer-121122009                                 |
| 3 Comment                 | CBCONHC2H4OMe-10mer                                           |
| 4 Origin                  | Varian                                                        |
| 5 Owner                   |                                                               |
| 6 Site                    |                                                               |
| 7 Spectrometer            | inova                                                         |
| 8 Author                  |                                                               |
| 9 Solvent                 | CD2Cl2                                                        |
| 10 Temperature            | 25.0                                                          |
| 11 Pulse Sequence         | s2pul                                                         |
| 12 Number of Scans        | 120                                                           |
| 13 Receiver Gain          | 44                                                            |
| 14 Relaxation Delay       | 1.0000                                                        |
| 15 Pulse Width            | 0.0000                                                        |
| 16 Acquisition Time       | 1.8920                                                        |
| 17 Acquisition Date       | 2009-12-12T17:13:24                                           |
| 18 Modification Date      | 2009-12-12T17:19:50                                           |
| 19 Spectrometer Frequency | 599.72                                                        |
| 20 Spectral Width         | 8000.0                                                        |
| 21 Lowest Frequency       | -1001.2                                                       |
| 22 Nucleus                | 1H                                                            |
| 23 Acquired Size          | 15136                                                         |
| 24 Spectral Size          | 32768                                                         |

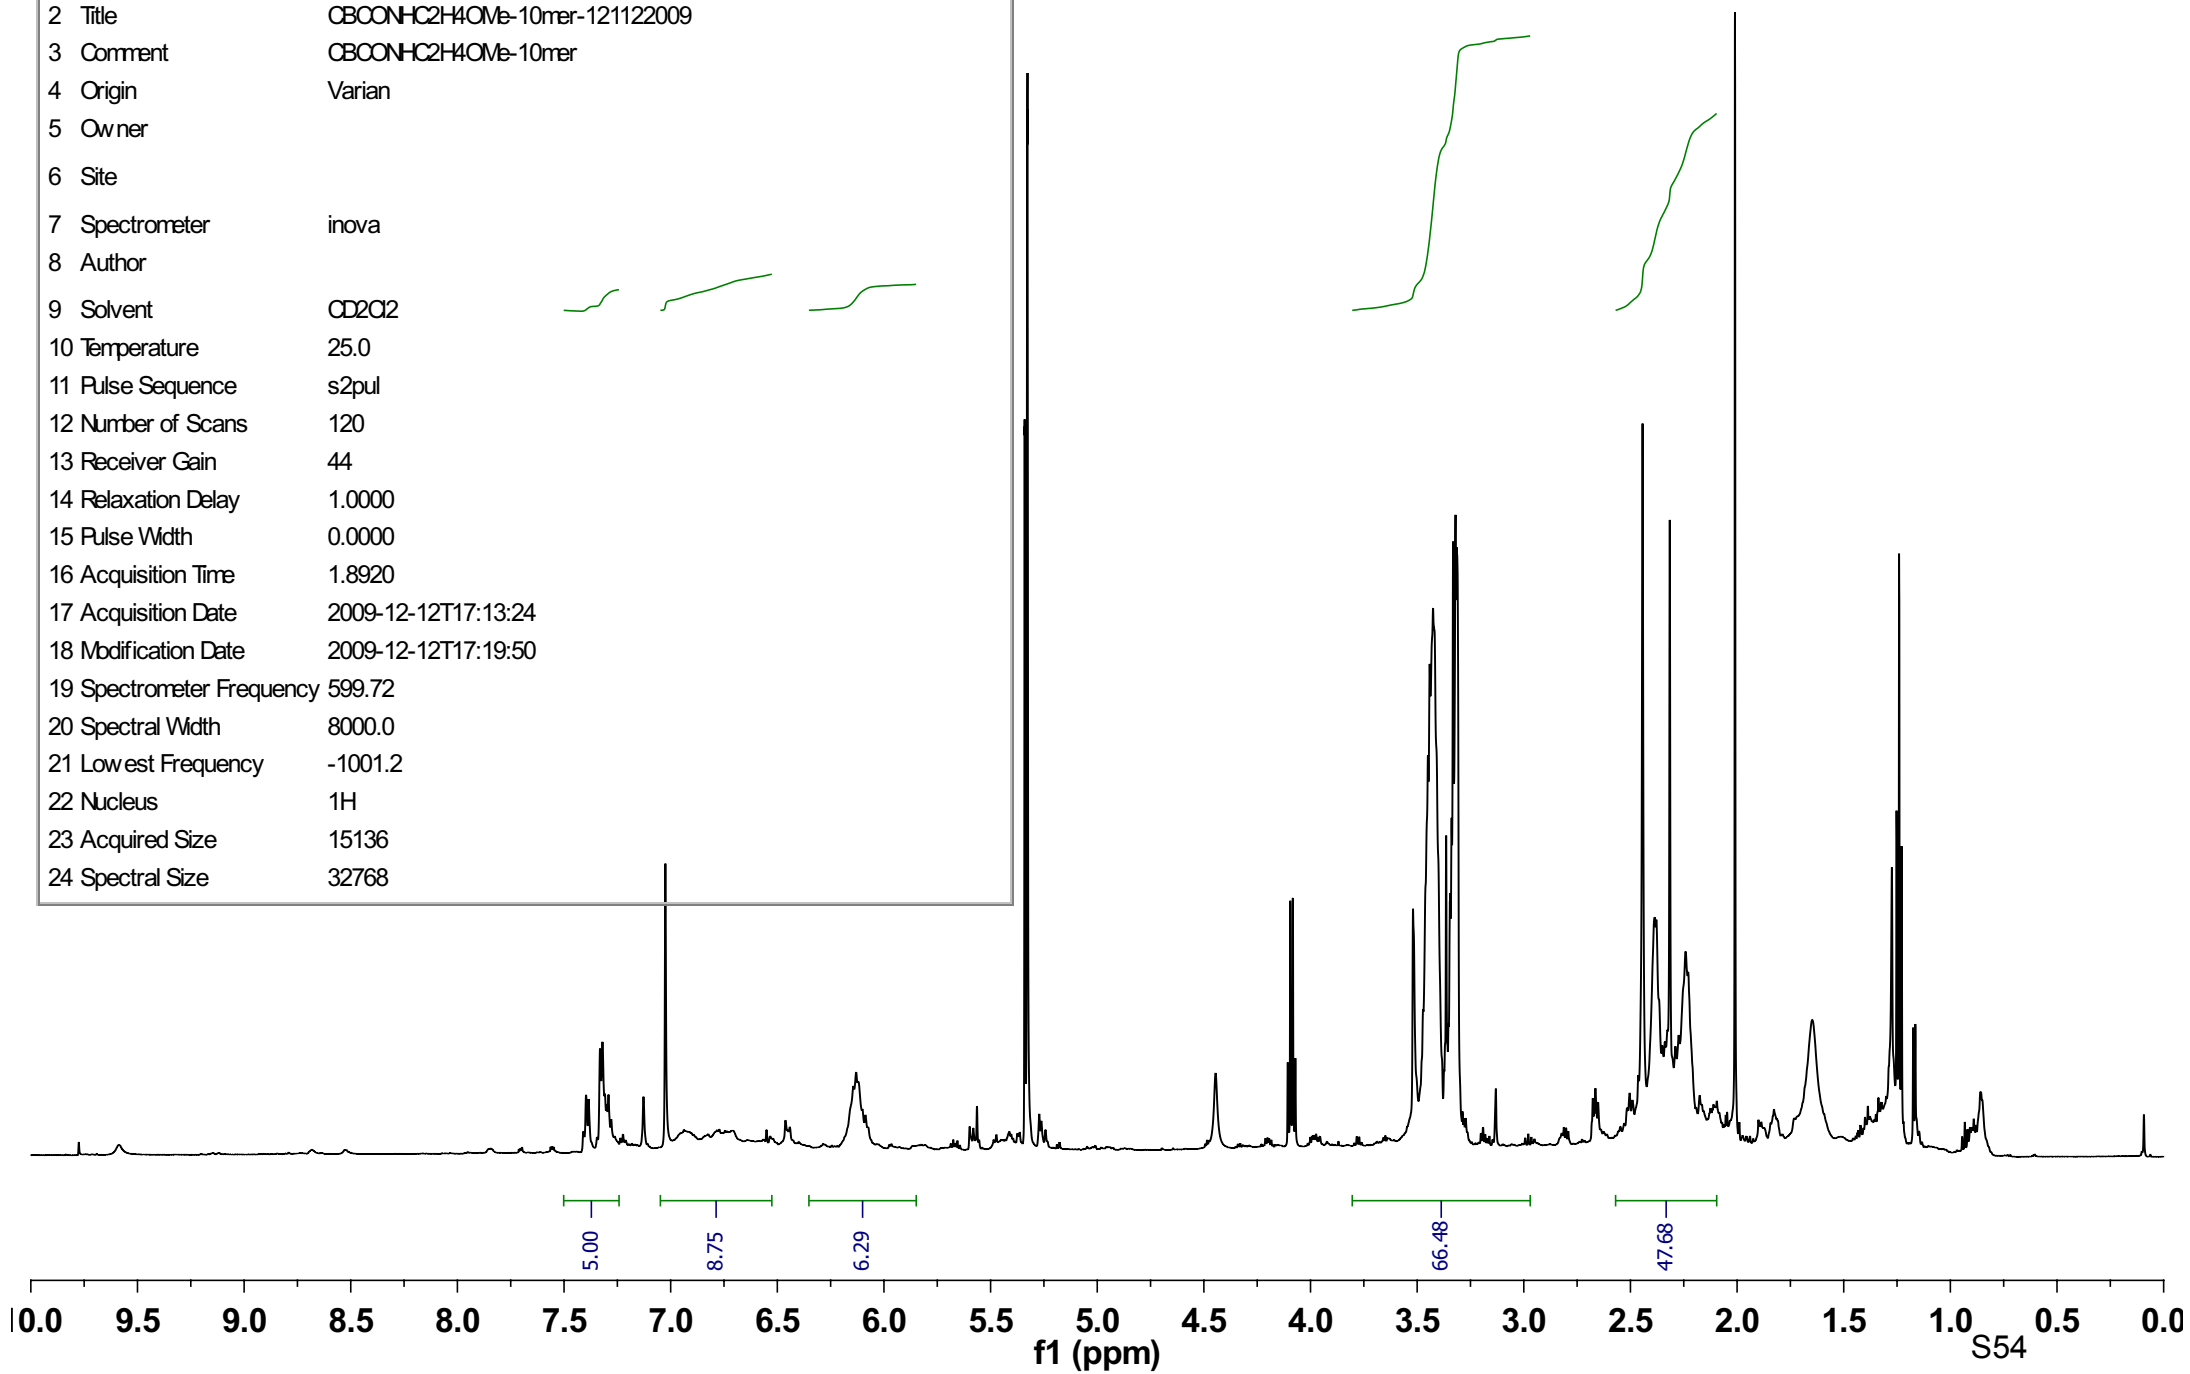

| Parameter                 | Value                                                        |
|---------------------------|--------------------------------------------------------------|
| 1 Data File Name          | G:/ 10142009-12122009/ CB-GluOtBuOMe-10mer-12122009.fid/ fid |
| 2 Title                   | CB-GluOtBuOMe-10mer-12122009                                 |
| 3 Comment                 | CBGluOtBuOMe-10mer                                           |
| 4 Origin                  | Varian                                                       |
| 5 Owner                   |                                                              |
| 6 Site                    |                                                              |
| 7 Spectrometer            | inova                                                        |
| 8 Author                  |                                                              |
| 9 Solvent                 | CD <sub>2</sub> Cl <sub>2</sub>                              |
| 10 Temperature            | 25.0                                                         |
| 11 Pulse Sequence         | s2pul                                                        |
| 12 Number of Scans        | 80                                                           |
| 13 Receiver Gain          | 38                                                           |
| 14 Relaxation Delay       | 1.0000                                                       |
| 15 Pulse Width            | 0.0000                                                       |
| 16 Acquisition Time       | 1.8920                                                       |
| 17 Acquisition Date       | 2009-12-12T13:34:06                                          |
| 18 Modification Date      | 2009-12-12T13:38:42                                          |
| 19 Spectrometer Frequency | 599.72                                                       |
| 20 Spectral Width         | 8000.0                                                       |
| 21 Lowest Frequency       | -1001.2                                                      |
| 22 Nucleus                | <sup>1</sup> H                                               |
| 23 Acquired Size          | 15136                                                        |
| 24 Spectral Size          | 32768                                                        |

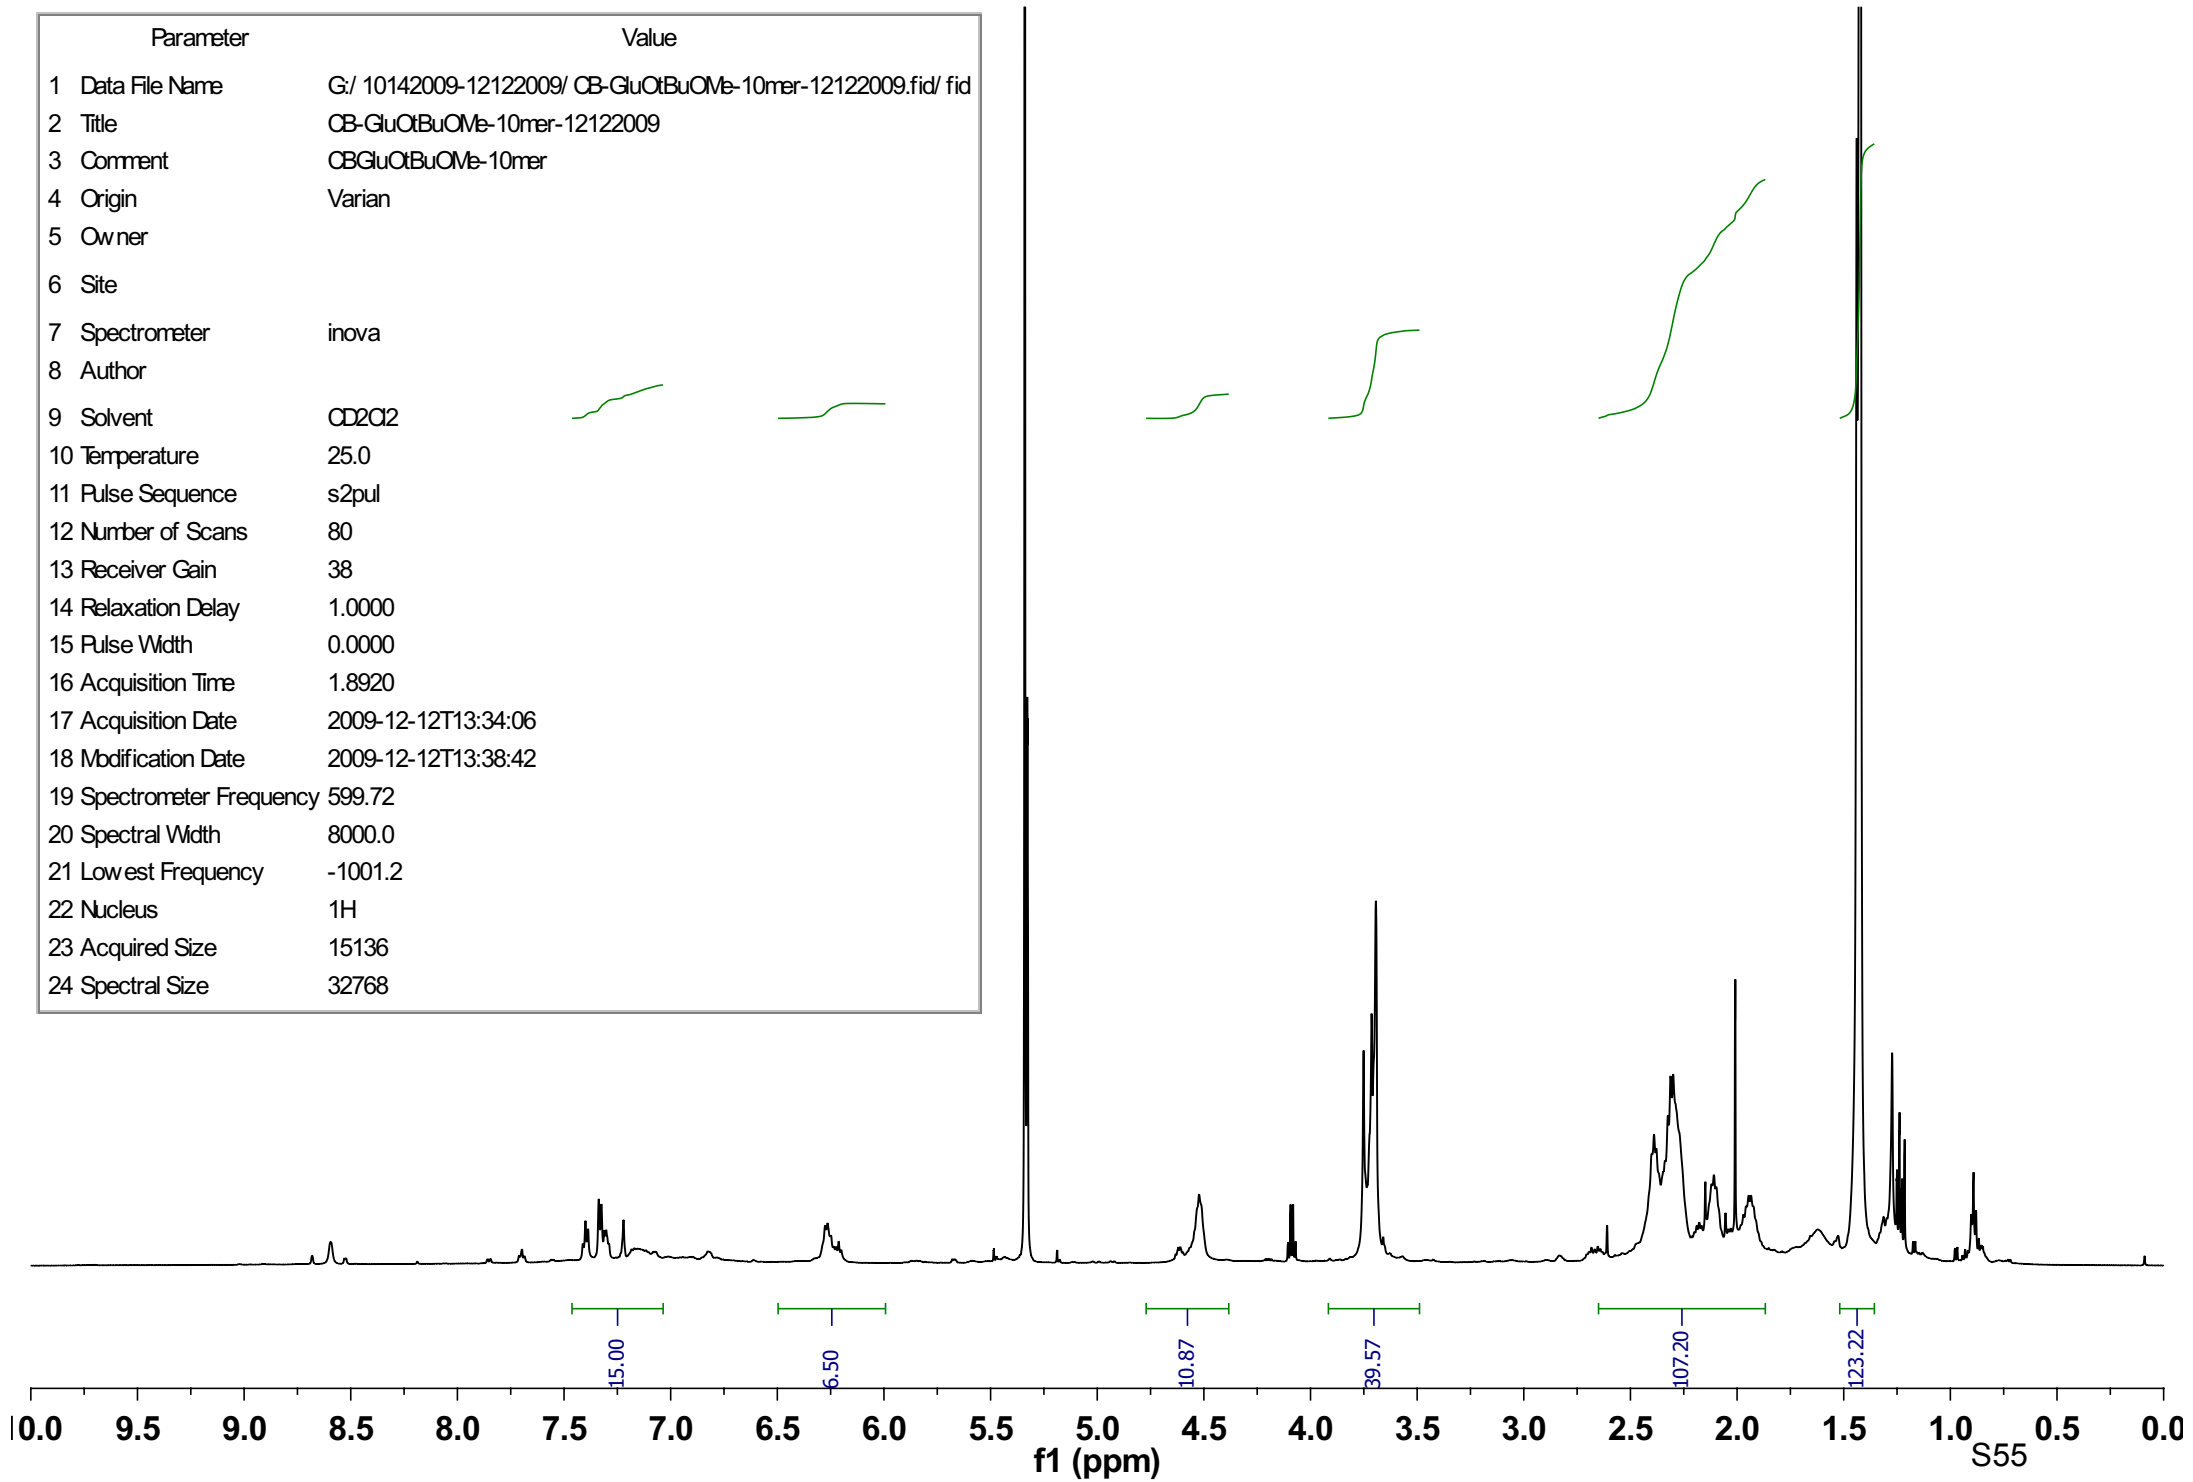

| Parameter                 | Value                                                           |
|---------------------------|-----------------------------------------------------------------|
| 1 Data File Name          | G:/ 10142009-12122009/ CB-CONHC3H6PhMe-10mer12122009-2.fid/ fid |
| 2 Title                   | CB-CONHC3H6PhMe-10mer12122009-2                                 |
| 3 Comment                 | CB-CONHC3H6PhMe-10mer                                           |
| 4 Origin                  | Varian                                                          |
| 5 Owner                   |                                                                 |
| 6 Site                    |                                                                 |
| 7 Spectrometer            | inova                                                           |
| 8 Author                  |                                                                 |
| 9 Solvent                 | CD2Cl2                                                          |
| 10 Temperature            | 25.0                                                            |
| 11 Pulse Sequence         | s2pul                                                           |
| 12 Number of Scans        | 72                                                              |
| 13 Receiver Gain          | 44                                                              |
| 14 Relaxation Delay       | 1.0000                                                          |
| 15 Pulse Width            | 0.0000                                                          |
| 16 Acquisition Time       | 1.8920                                                          |
| 17 Acquisition Date       | 2009-12-12T13:44:10                                             |
| 18 Modification Date      | 2009-12-12T13:48:10                                             |
| 19 Spectrometer Frequency | 599.72                                                          |
| 20 Spectral Width         | 8000.0                                                          |
| 21 Lowest Frequency       | -1001.2                                                         |
| 22 Nucleus                | 1H                                                              |
| 23 Acquired Size          | 15136                                                           |
| 24 Spectral Size          | 32768                                                           |

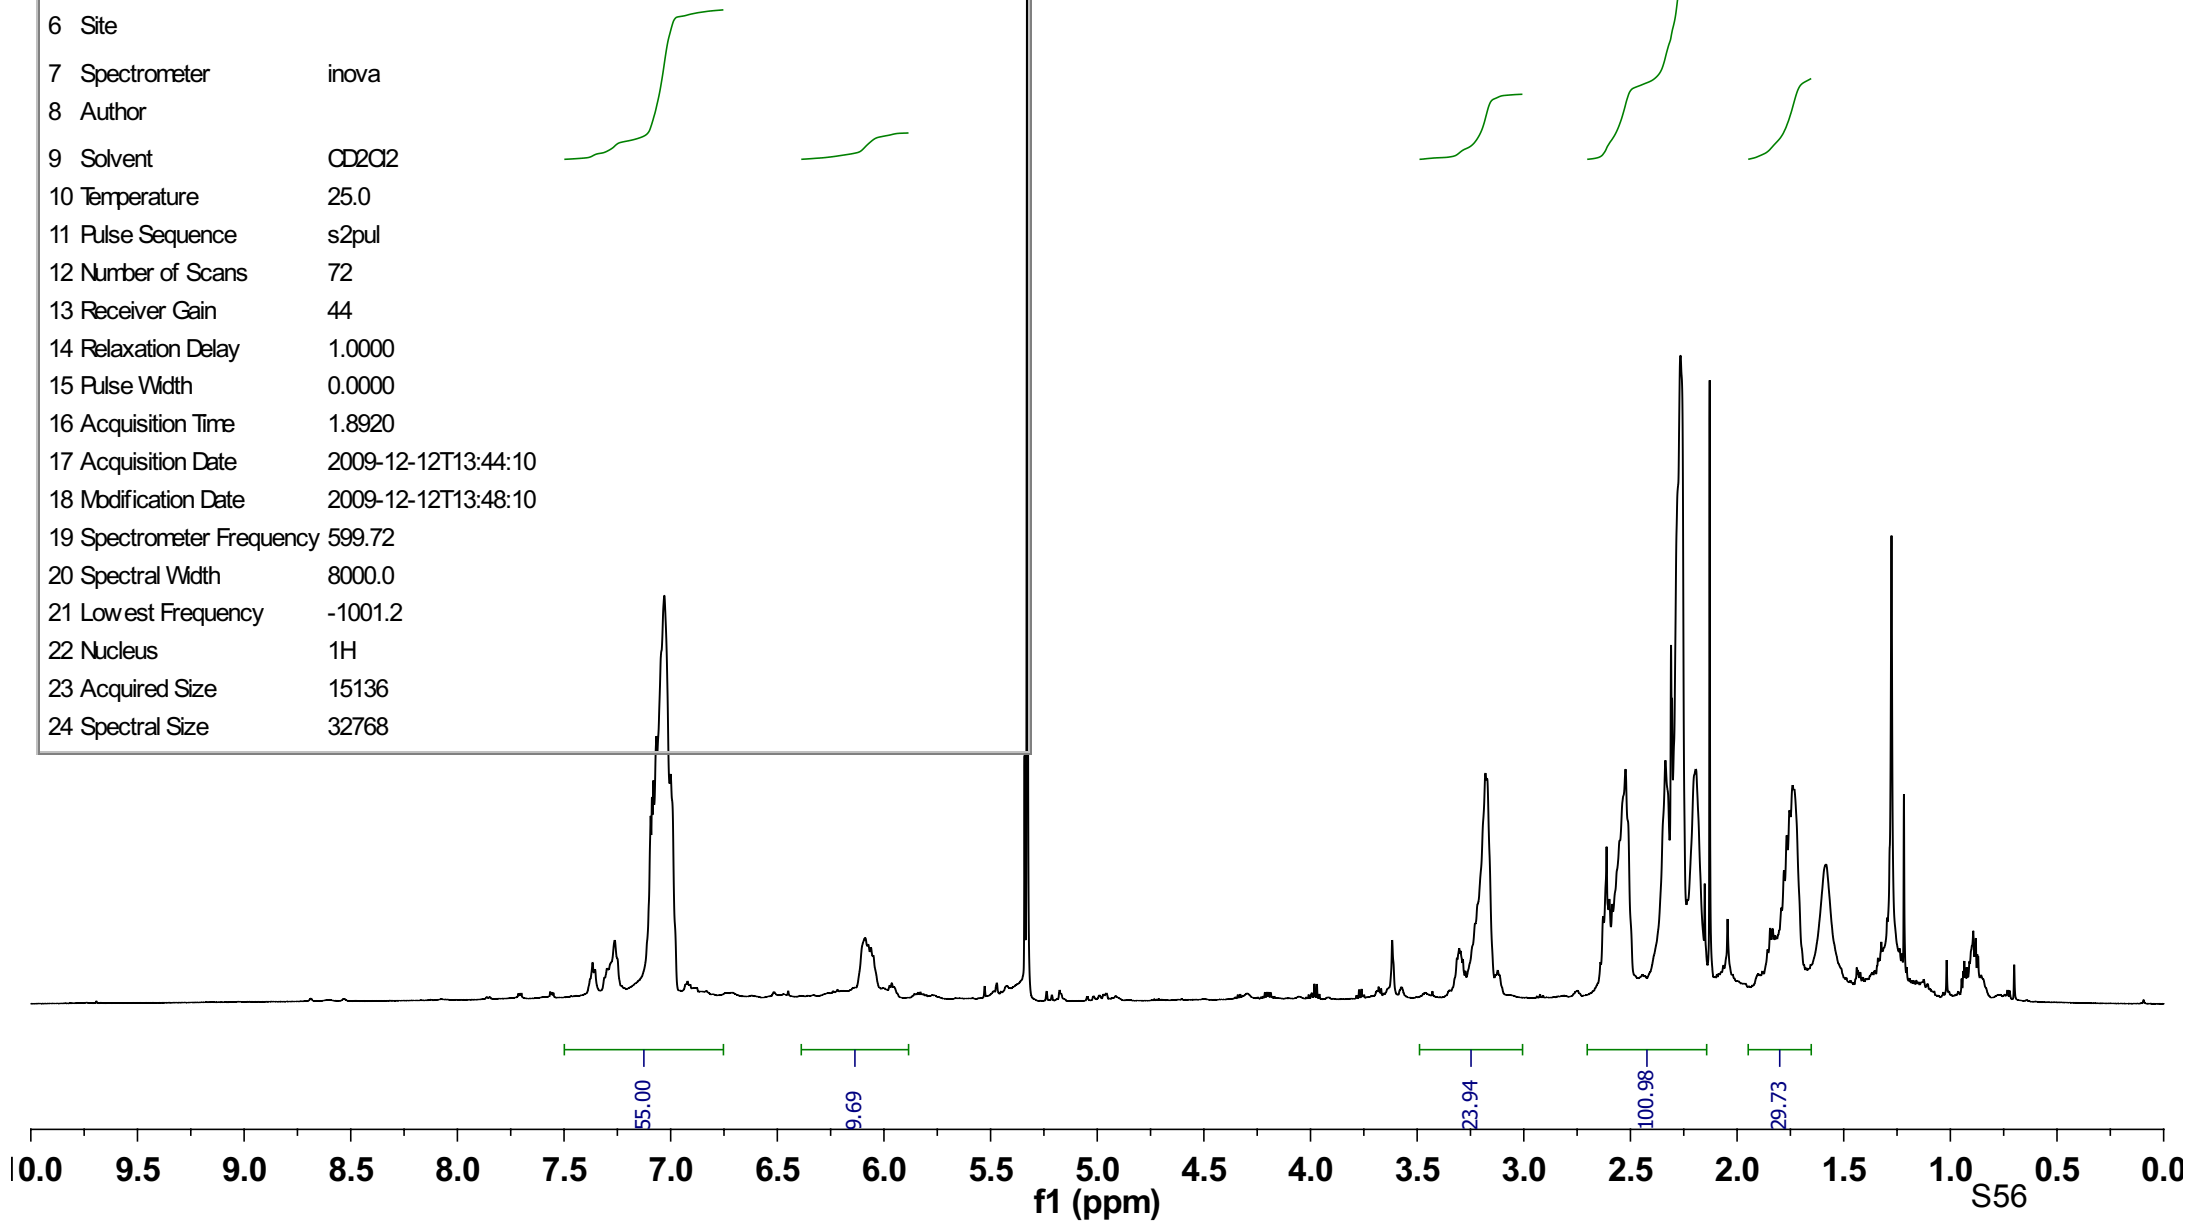

S56
